# Supplementary material for: Heterosis for Resistance to Insect Herbivores in a 3-Line Hybrid Rice System
Source: MDPI journal article supplement (doi:10.3390/insects15030164), 2024-02-28
Supplement: s1 [file s1]

Supplementary Information

Table S1: Results from bioassays with BPH on 15 hybrid rice varieties and their female (A and B lines) and male (restorer/R lines) parents. Summarized information from this table is presented in Table S2 and Figure 1.

| Accession          | Development Stages <sup>1</sup> |               |             |               |               |              | Brachypterous<br>(Proportion) <sup>1</sup> | Females (Proportion)<br><sup>1</sup> | Total Number of<br>Individuals <sup>1</sup> | Total Dry Weight <sup>1,2</sup> |
|--------------------|---------------------------------|---------------|-------------|---------------|---------------|--------------|--------------------------------------------|--------------------------------------|---------------------------------------------|---------------------------------|
|                    | 1st instars                     | 2nd instars   | 3rd instars | 4th instars   | 5th instars   | adults       |                                            |                                      |                                             |                                 |
| IR 82396 H         | 0.28 (0.06)b                    | 0.22 (0.07)   | 0.21 (0.02) | 0.20 (0.080)  | 0.06 (0.03)   | 0.04 (0.03)  | 0.67 (0.33)                                | 0.44 (0.29)                          | 449.00 (161.78)ab                           | 28.35 (6.21)                    |
| IR 80156 A         | 0.41 (0.05)b                    | 0.17 (0.03)   | 0.17 (0.02) | 0.12 (0.03)   | 0.09 (0.01)   | 0.03 (0.01)  | 0.90 (0.10)                                | 0.08 (0.04)                          | 333.25 (41.54)ab                            | 72.28 (31.19)                   |
| IR 80156 B         | 0.06 (0.03)a                    | 0.10 (0.05)   | 0.28 (0.10) | 0.27 (0.05)   | 0.13 (0.06)   | 0.16 (0.15)  | 1.00 (0.00)                                | 0.33 (0.33)                          | 60.50 (35.89)a                              | 7.32 (2.90)                     |
| IR 46 R            | 0.24 (0.03)ab                   | 0.23 (0.02)   | 0.26 (0.01) | 0.19 (0.04)   | 0.07 (0.02)   | 0.01 (0.01)  | 0.90 (0.10)                                | 0.19 (0.12)                          | 812.75 (192.85)b                            | 57.81 (5.63)                    |
| F-Accession        | 10.800***                       | 1.639ns       | 0.911ns     | 1.344ns       | 0.719ns       | 0.852ns      | 0.647ns (3,9)                              | 0.523ns (9)                          | 5.860*                                      | 3.239ns                         |
| IR 82391 H         | 0.36 (0.07)b                    | 0.23 (0.04)   | 0.16 (0.03) | 0.12 (0.03)   | 0.10 (0.02)   | 0.03 (0.01)  | 0.69 (0.20)                                | 0.16 (0.06)                          | 254.00 (47.22)                              | 30.66 (6.28)                    |
| IR 79156 A         | 0.22 (0.03)ab                   | 0.25 (0.06)   | 0.28 (0.02) | 0.16 (0.04)   | 0.08 (0.03)   | 0.02 (0.01)  | 0.98 (0.02)                                | 0.22 (0.15)                          | 696.50 (167.12)                             | 58.50 (16.11)                   |
| IR 79156 B         | 0.19 (0.08)ab                   | 0.18 (0.05)   | 0.16 (0.02) | 0.14 (0.02)   | 0.17 (0.05)   | 0.15 (0.14)  | 0.85 (0.15)                                | 0.13 (0.10)                          | 353.25 (189.30)                             | 35.68 (5.28)                    |
| IR 60819-34-2      | 0.09 (0.04)a                    | 0.15 (0.06)   | 0.32 (0.15) | 0.15 (0.04)   | 0.14 (0.04)   | 0.15 (0.13)  | 1.00 (0.00)                                | 0.24 (0.09)                          | 698.00 (267.68)                             | 58.58 (4.27)                    |
| F-Accession        | 3.472*                          | 0.687ns       | 0.987ns     | 0.267ns       | 1.198ns       | 0.606ns      | 1.159ns                                    | 0.265ns                              | 1.549ns                                     | 2.534ns                         |
| IR 84714 H         | 0.34 (0.08)b                    | 0.23 (0.01)bc | 0.17 (0.02) | 0.14 (0.04)a  | 0.10 (0.04)a  | 0.02 (0.01)  | 1.00 (0.00)                                | 0.19 (0.11)                          | 330.25 (77.29)ab                            | 33.47 (6.89)                    |
| IR 80559 A         | 0.06 (0.00)a                    | 0.08 (0.02)a  | 0.22 (0.03) | 0.28 (0.00)b  | 0.32 (0.06)b  | 0.04 (0.01)  | 1.00 (0.00)                                | 0.08 (0.03)                          | 306.00 (72.20)a                             | 45.00 (5.13)                    |
| IR 80559 B         | 0.23 (0.06)ab                   | 0.25 (0.02)c  | 0.31 (0.02) | 0.14 (0.04)a  | 0.08 (0.01)a  | 0.00 (0.00)  |                                            |                                      | 755.50 (36.19)b                             | 43.21 (5.46)                    |
| IR60819-34-2 R     | 0.16 (0.05)ab                   | 0.17 (0.02)b  | 0.22 (0.07) | 0.20 (0.03)ab | 0.21 (0.05)ab | 0.04 (0.02)  | 0.86 (0.07)                                | 0.57 (0.21)                          | 344.50 (184.87)ab                           | 43.47 (11.94)                   |
| F-Accession        | 4.511*                          | 21.935***     | 1.729ns     | 4.476*        | 6.201**       | 2.809ns      | 4.891* (2,7)                               | 4.346ns (2,7)                        | 3.957*                                      | 0.451ns                         |
| IR 85471 H         | 0.11 (0.05)                     | 0.23 (0.05)   | 0.25 (0.06) | 0.26 (0.03)   | 0.12 (0.02)   | 0.03 (0.01)  | 0.85 (0.10)                                | 0.17 (0.10)ab                        | 458.00 (170.76)                             | 52.52 (8.08)                    |
| IR 80564 A         | 0.23 (0.06)                     | 0.17 (0.01)   | 0.24 (0.00) | 0.20 (0.04)   | 0.15 (0.04)   | 0.00 (0.00)  | 0.00 (0.00)                                | 0.00 (0.00)a                         | 317.50 (41.48)                              | 24.23 (5.81)                    |
| IR 80564 B         | 0.15 (0.06)                     | 0.24 (0.04)   | 0.22 (0.04) | 0.23 (0.05)   | 0.14 (0.03)   | 0.01 (0.00)  | 0.75 (0.25)                                | 0.00 (0.00)a                         | 265.75 (54.44)                              | 24.73 (7.99)                    |
| IR60819-34-2 R     | 0.16 (0.05)                     | 0.17 (0.02)   | 0.22 (0.07) | 0.20 (0.03)   | 0.21 (0.05)   | 0.04 (0.02)  | 0.86 (0.07)                                | 0.57 (0.21)b                         | 344.50 (184.87)                             | 43.47 (11.94)                   |
| F-Accession        | 0.841ns                         | 1.437ns       | 0.114ns     | 0.640ns       | 1.474ns       | 1.442ns      | 3.628ns (3,8)                              | 5.363* (3,8)                         | 0.388ns                                     | 2.593ns                         |
| IR 81954 H         | 0.17 (0.05)                     | 0.21 (0.03)   | 0.38 (0.08) | 0.15 (0.03)   | 0.08 (0.03)   | 0.00 (0.00)a |                                            |                                      | 671.75 (66.56)b                             | 43.49 (0.99)                    |
| IR 70369 A         | 0.27 (0.12)                     | 0.12 (1.01)   | 0.28 (0.07) | 0.21 (0.04)   | 0.12 (0.03)   | 0.02 (1.00)a | 1.00 (0.00)                                | 0.00 (0.00)                          | 298.50 (36.75)a                             | 36.51 (6.44)                    |
| IR 70369 B         | 0.19 (0.05)                     | 0.22 (0.04)   | 0.28 (0.01) | 0.15 (0.04)   | 0.15 (0.04)   | 0.01 (0.00)a | 0.94 (0.06)                                | 0.33 (0.17)                          | 528.00 (141.92)ab                           | 44.15 (11.13)                   |
| IR72889-46-3-2-1 R | 0.22 (0.03)                     | 0.21 (0.02)   | 0.18 (0.03) | 0.17 (0.02)   | 0.17 (0.06)   | 0.04 (0.01)b | 1.00 (0.00)                                | 0.19 (0.11)                          | 231.00 (73.68)a                             | 24.20 (5.99)                    |
| F-Accession        | 0.354ns                         | 2.703ns       | 2.020ns     | 0.601ns       | 0.934ns       | 13.449***    |                                            |                                      | 5.313*                                      | 1.697ns                         |

|                       |             |               |             |             |             |             |                |                |                   |                 |
|-----------------------|-------------|---------------|-------------|-------------|-------------|-------------|----------------|----------------|-------------------|-----------------|
| IR 80637 H            | 0.20 (0.04) | 0.25 (0.05)   | 0.30 (0.07) | 0.16 (0.05) | 0.08 (0.04) | 0.01 (0.00) | 0.91 (0.05)    | 0.25 (0.25)    | 466.75 (161.55)   | 47.97 (7.17)    |
| IR 73328 A            | 0.21 (0.04) | 0.26 (0.01)   | 0.28 (0.04) | 0.17 (0.02) | 0.07 (0.01) | 0.02 (0.01) | 0.86 (0.10)    | 0.28 (0.09)    | 410.00 (37.31)    | 43.57 (3.53)    |
| IR 73328 B            | 0.38 (0.15) | 0.12 (1.04)   | 0.19 (0.05) | 0.17 (0.07) | 0.12 (0.03) | 0.02 (1.01) | 1.00 (0.00)    | 0.18 (0.07)    | 385.00 (62.96)    | 38.86 (1.96)    |
| IR73013-95-1-3-2 R    | 0.21 (0.09) | 0.18 (0.06)   | 0.25 (0.02) | 0.20 (0.07) | 0.15 (0.10) | 0.02 (0.01) | 0.76 (0.12)    | 0.14 (0.07)    | 282.25 (94.35)    | 29.68 (5.30)    |
| F-Accession           | 0.839na     | 2.077ns       | 0.900ns     | 0.110ns     | 0.507ns     | 0.066ns     | 1.915ns (3,10) | 0.154ns (3,10) | 0.590ns           | 2.559ns         |
| IR 82385 H            | 0.09 (0.04) | 0.12 (0.02)ab | 0.31 (0.07) | 0.22 (0.03) | 0.17 (0.06) | 0.08 (0.02) | 1.00 (0.00)b   | 0.14 (0.08)    | 188.00 (76.46)    | 23.79 (7.07)    |
| IR 79125 A            | 0.29 (0.18) | 0.06 (1.03)a  | 0.11 (0.05) | 0.12 (0.03) | 0.37 (0.17) | 0.05 (1.03) | 1.00 (0.00)b   | 0.24 (0.13)    | 288.00 (99.58)    | 25.88 (5.72)    |
| IR 79125 B            | 0.17 (0.05) | 0.19 (0.04)b  | 0.17 (0.02) | 0.20 (0.04) | 0.19 (0.04) | 0.08 (0.02) | 0.78 (0.04)a   | 0.30 (0.06)    | 180.75 (49.73)    | 29.73 (3.72)    |
| IR73717-46-1-3-3 R    | 0.26 (0.06) | 0.22 (0.02)b  | 0.25 (0.05) | 0.12 (0.02) | 0.12 (0.04) | 0.02 (0.01) | 0.89 (0.11)ab  | 0.22 (0.22)    | 279.75 (79.12)    | 33.83 (3.94)    |
| F-Accession           | 0.806ns     | 5.517*        | 3.180ns     | 2.671ns     | 1.146ns     | 1.581ns     | 4.653* (3,10)  | 0.366ns (3,10) | 0.542ns           | 0.699ns         |
| IR 82363 H            | 0.15 (0.05) | 0.21 (0.06)   | 0.30 (0.07) | 0.17 (0.04) | 0.17 (0.05) | 0.02 (0.01) | 0.80 (0.20)    | 0.41 (0.21)    | 264.75 (81.22)a   | 45.89 (8.86)ab  |
| IR 68897 A            | 0.19 (0.04) | 0.28 (0.09)   | 0.22 (0.02) | 0.15 (0.05) | 0.14 (0.03) | 0.00 (0.00) | 1.00 (0.00)    | 0.33 (0.17)    | 255.50 (49.67)a   | 28.93 (5.60)a   |
| IR 68897 B            | 0.28 (0.06) | 0.29 (0.04)   | 0.21 (0.04) | 0.13 (0.05) | 0.06 (0.01) | 0.02 (0.01) | 0.93 (0.07)    | 0.08 (0.05)    | 816.50 (183.90)b  | 60.64 (7.62)b   |
| SRT 3 R               | 0.23 (0.10) | 0.17 (1.04)   | 0.12 (0.05) | 0.16 (0.04) | 0.27 (0.16) | 0.05 (1.01) | 0.90 (0.08)    | 0.48 (0.28)    | 323.00 (190.98)ab | 28.99 (9.22)a   |
| F-Accession           | 0.711ns     | 0.991ns       | 2.245ns     | 0.105ns     | 1.030ns     | 3.429ns     | 0.676ns (9)    | 0.892ns (9)    | 3.658*            | 3.686*          |
| IR 80814 H            | 0.31 (0.03) | 0.23 (0.03)   | 0.21 (0.02) | 0.18 (0.03) | 0.06 (0.02) | 0.01 (0.00) | 1.00 (0.00)    | 0.00 (0.00)a   | 810.00 (217.84)b  | 69.05 (11.43)b  |
| IR 70369 A            | 0.27 (0.12) | 0.12 (1.01)   | 0.28 (0.07) | 0.21 (0.04) | 0.12 (0.03) | 0.02 (1.00) | 1.00 (0.00)    | 0.00 (0.00)a   | 298.50 (36.75)ab  | 36.51 (6.44)ab  |
| IR 70369 B            | 0.19 (0.05) | 0.22 (0.04)   | 0.28 (0.01) | 0.15 (0.04) | 0.15 (0.04) | 0.01 (0.00) | 0.94 (0.06)    | 0.33 (0.17)b   | 528.00 (141.92)ab | 44.15 (11.13)ab |
| IR69712-154-2-3-1-3 R | 0.19 (0.07) | 0.21 (0.04)   | 0.23 (0.07) | 0.17 (0.04) | 0.17 (0.05) | 0.04 (0.02) | 1.00 (0.00)    | 0.00 (0.00)a   | 165.25 (60.84)a   | 25.46 (7.40)a   |
| F-Accession           | 0.635ns     | 2.175ns       | 0.458ns     | 0.402ns     | 1.508ns     | 2.515ns     | 1.310ns (3,10) | 5.238* (3,10)  | 4.400*            | 3.906*          |
| IR 81955 H            | 0.25 (0.06) | 0.26 (0.01)b  | 0.21 (0.03) | 0.10 (0.03) | 0.15 (0.05) | 0.03 (0.03) | 0.75 (0.14)    | 0.25 (0.14)    | 680.50 (218.52)   | 50.33 (14.16)   |
| IR 70369 A            | 0.27 (0.12) | 0.12 (1.01)b  | 0.28 (0.07) | 0.21 (0.04) | 0.12 (0.03) | 0.02 (1.00) | 1.00 (0.00)    | 0.00 (0.00)    | 298.50 (36.75)    | 36.51 (6.44)    |
| IR 70369 B            | 0.19 (0.05) | 0.22 (0.04)a  | 0.28 (0.01) | 0.15 (0.04) | 0.15 (0.04) | 0.01 (0.00) | 0.94 (0.06)    | 0.33 (0.17)    | 528.00 (141.92)   | 44.15 (11.13)   |
| IR72998-93-3-3-2 R    | 0.16 (0.07) | 0.14 (0.05)a  | 0.18 (0.07) | 0.15 (0.05) | 0.28 (0.13) | 0.09 (0.03) | 0.96 (0.04)    | 0.04 (0.04)    | 247.50 (195.58)   | 23.46 (9.37)    |
| F-Accession           | 0.405ns     | 3.692*        | 0.925ns     | 1.100ns     | 0.962ns     | 2.602ns     | 1.855ns (3,11) | 2.314ns (3,11) | 1.521ns           | 1.181ns         |
| IR 81956 H            | 0.20 (0.08) | 0.16 (0.06)   | 0.26 (0.03) | 0.25 (0.10) | 0.12 (0.06) | 0.01 (0.00) | 0.92 (0.08)    | 0.08 (0.08)ab  | 597.50 (89.06)    | 55.34 (3.26)    |
| IR 70369 A            | 0.27 (0.12) | 0.12 (1.01)   | 0.28 (0.07) | 0.21 (0.04) | 0.12 (0.03) | 0.02 (1.00) | 1.00 (0.00)    | 0.00 (0.00)a   | 298.50 (36.75)    | 36.51 (6.44)    |
| IR 70369 B            | 0.19 (0.05) | 0.22 (0.04)   | 0.28 (0.01) | 0.15 (0.04) | 0.15 (0.04) | 0.01 (0.00) | 0.94 (0.06)    | 0.33 (0.17)b   | 528.00 (141.92)   | 44.15 (11.13)   |
| IR73003-73-2-3-2 R    | 0.25 (0.08) | 0.18 (0.05)   | 0.26 (0.03) | 0.13 (0.05) | 0.11 (0.05) | 0.07 (0.05) | 1.00 (0.00)    | 0.00 (0.00)a   | 379.00 (160.30)   | 37.13 (6.61)    |
| F-Accession           | 0.183ns     | 0.876ns       | 0.091ns     | 0.827ns     | 0.130ns     | 1.316ns     | 0.733ns (3,11) | 3.582* (3,11)  | 1.351ns           | 1.395ns         |
| IR 81958 H            | 0.18 (0.09) | 0.25 (0.07)   | 0.22 (0.05) | 0.17 (0.07) | 0.14 (0.05) | 0.03 (0.01) | 0.91 (0.07)    | 0.09 (0.07)    | 548.50 (192.25)   | 47.65 (12.39)   |

|                      |               |             |               |             |             |             |                |                |                  |               |
|----------------------|---------------|-------------|---------------|-------------|-------------|-------------|----------------|----------------|------------------|---------------|
| IR 70369 A           | 0.27 (0.12)   | 0.12 (1.01) | 0.28 (0.07)   | 0.21 (0.04) | 0.12 (0.03) | 0.02 (1.00) | 1.00 (0.00)    | 0.00 (0.00)    | 298.50 (36.75)   | 36.51 (6.44)  |
| IR 70369 B           | 0.19 (0.05)   | 0.22 (0.04) | 0.28 (0.01)   | 0.15 (0.04) | 0.15 (0.04) | 0.01 (0.00) | 0.94 (0.06)    | 0.33 (0.17)    | 528.00 (141.92)  | 44.15 (11.13) |
| IR73013-95-1-3-2 R   | 0.21 (0.09)   | 0.18 (0.06) | 0.25 (0.02)   | 0.20 (0.07) | 0.15 (0.10) | 0.02 (0.01) | 0.76 (0.12)    | 0.14 (0.07)    | 282.25 (94.35)   | 29.68 (5.30)  |
| F-Accession          | 0.194ns       | 1.236ns     | 0.418ns       | 0.211ns     | 0.070ns     | 1.244ns     | 2.325ns (3,9)  | 2.648ns (3,9)  | 1.223ns          | 0.742ns       |
| IR 80228 H           | 0.08 (0.03)   | 0.15 (0.05) | 0.33 (0.02)b  | 0.24 (0.06) | 0.14 (0.04) | 0.06 (0.02) | 0.84 (0.08)    | 0.16 (0.08)    | 189.75 (93.02)   | 21.54 (6.33)  |
| IR 70369 A           | 0.27 (0.12)   | 0.12 (1.01) | 0.28 (0.07)ab | 0.21 (0.04) | 0.12 (0.03) | 0.02 (1.00) | 1.00 (0.00)    | 0.00 (0.00)    | 298.50 (36.75)   | 36.51 (6.44)  |
| IR 70369 B           | 0.19 (0.05)   | 0.22 (0.04) | 0.28 (0.01)ab | 0.15 (0.04) | 0.15 (0.04) | 0.01 (0.00) | 0.94 (0.06)    | 0.33 (0.17)    | 528.00 (141.92)  | 44.15 (11.13) |
| IR73885-1-4-3-2-1-6R | 0.23 (0.08)   | 0.18 (0.08) | 0.12 (0.05)a  | 0.21 (0.0)  | 0.22 (0.10) | 0.04 (0.02) | 0.94 (0.04)    | 0.06 (0.04)    | 291.25 (151.45)  | 30.41 (12.97) |
| F-Accession          | 1.072ns       | 0.689ns     | 3.901*        | 0.457ns     | 0.563ns     | 2.181ns     | 1.818ns (3,10) | 3.164ns (3,10) | 1.541ns          | 0.980ns       |
| IR 81949 H           | 0.21 (0.07)   | 0.19 (0.05) | 0.31 (0.06)   | 0.23 (0.05) | 0.06 (0.01) | 0.01 (0.00) | 0.95 (0.05)    | 0.05 (0.05)    | 391.25 (35.26)ab | 32.49 (4.80)a |
| IR 68897 A           | 0.19 (0.04)   | 0.28 (0.09) | 0.22 (0.02)   | 0.15 (0.05) | 0.14 (0.03) | 0.00 (0.00) | 1.00 (0.00)    | 0.33 (0.17)    | 255.50 (49.67)a  | 28.93 (5.60)a |
| IR 68897 B           | 0.28 (0.06)   | 0.29 (0.04) | 0.21 (0.04)   | 0.13 (0.05) | 0.06 (0.01) | 0.02 (0.01) | 0.93 (0.07)    | 0.08 (0.05)    | 816.50 (183.90)b | 60.64 (7.62)b |
| IR73013-95-1-3-2 R   | 0.21 (0.09)   | 0.18 (0.06) | 0.25 (0.02)   | 0.20 (0.07) | 0.15 (0.10) | 0.02 (0.01) | 0.76 (0.12)    | 0.14 (0.07)    | 282.25 (94.35)a  | 29.68 (5.30)a |
| F-Accession          | 0.353ns       | 1.019ns     | 1.120ns       | 0.618ns     | 0.975ns     | 0.748ns     | 1.802ns (3,10) | 2.119ns (3,10) | 5.830*           | 6.587**       |
| IR 86167 H           | 0.24 (0.10)ab | 0.20 (1.06) | 0.18 (0.06)   | 0.09 (0.04) | 0.20 (0.14) | 0.10 (1.07) | 0.91 (0.09)    | 0.09 (0.09)    | 121.50 (39.22)ab | 21.94 (4.33)  |
| IR80156A             | 0.41 (0.05)b  | 0.17 (0.03) | 0.17 (0.02)   | 0.12 (0.03) | 0.09 (0.01) | 0.03 (0.01) | 0.90 (0.10)    | 0.08 (0.04)    | 333.25 (41.54)b  | 72.28 (31.19) |
| IR80156B             | 0.06 (0.03)a  | 0.10 (0.05) | 0.28 (0.10)   | 0.27 (0.05) | 0.13 (0.06) | 0.16 (0.05) | 1.00 (0.00)    | 0.33 (0.33)    | 60.50 (35.89)a   | 7.32 (2.90)   |
| IR73013-95-1-3-2 R   | 0.21 (0.09)ab | 0.18 (0.06) | 0.25 (0.02)   | 0.20 (0.07) | 0.15 (0.10) | 0.02 (0.01) | 0.76 (0.12)    | 0.14 (0.07)    | 282.25 (94.35)ab | 29.68 (5.30)  |
| F-Accession          | 4.169*        | 0.650ns     | 0.749ns       | 2.715ns     | 0.264ns     | 0.725ns     | 1.242ns (3,8)  | 0.448ns (3,8)  | 4.959*           | 3.029ns       |

1: Numbers are means (SEM)(N=4); DF = 4,15 unless indicated in parentheses, ns = P > 0.05, \* = P < 0.05, \*\* = P < 0.01, \*\*\* = P < 0.005; lowercase letters indicate homogenous line groups (Tukey: P > 0.05). 2: Note that some of the results for BPH biomass have been summarized by plant-type and presented in a related paper by Horgan et al (2016); the data and information by accession has not been previously published.

Table S2: Responses by BPH to 15 hybrid rice varieties indicating potential sources of resistance/susceptibility based on heterosis or heterbeltiosis with parental lines. Information related to the parental lines and statistical results used to determine heterosis/heterobeltiosis are presented in Table S1. Data is summarized in Figure 1 or the main text.

| Accession   | Development Stages <sup>1</sup> |                          |                          |                          |                          |             | Brachypterous<br>(Proportion) <sup>1</sup> | Female (Proportion) <sup>1</sup> | Total Number of<br>Individuals <sup>1,2</sup> | Totla Dry Weight <sup>1,2</sup> |
|-------------|---------------------------------|--------------------------|--------------------------|--------------------------|--------------------------|-------------|--------------------------------------------|----------------------------------|-----------------------------------------------|---------------------------------|
|             | 1st instars <sup>2</sup>        | 2nd instars <sup>2</sup> | 3rd instars <sup>2</sup> | 4th instars <sup>2</sup> | 5th instars <sup>2</sup> | adults      |                                            |                                  |                                               |                                 |
| IR82396H    | 0.28 (0.06)                     | 0.22 (0.07)              | 0.21 (0.02)              | 0.20 (0.080)             | 0.06 (0.03)              | 0.04 (0.03) | 0.67 (0.33)                                | 0.44 (0.29)                      | 449.00 (161.78)ab                             | 28.35 (6.21)a                   |
| IR 86167 H  | 0.24 (0.10)                     | 0.20 (1.06)              | 0.18 (0.06)              | 0.09 (0.04)              | 0.20 (0.14)              | 0.10 (1.07) | 0.91 (0.09)                                | 0.09 (0.09)                      | 121.50 (39.22)a                               | 21.94 (4.33)a                   |
| IR 81954 H  | 0.17 (0.05)                     | 0.21 (0.03)              | 0.38 (0.08)              | 0.15 (0.03)              | 0.08 (0.03)              | 0.00 (0.00) |                                            |                                  | 671.75 (66.56)ab                              | 43.49 (0.99)ab                  |
| IR 80814 H  | 0.31 (0.03)                     | 0.23 (0.03)              | 0.21 (0.02)              | 0.18 (0.03)              | 0.06 (0.02)              | 0.01 (0.00) | 1.00 (0.00)                                | 0.00 (0.00)a                     | 810.00 (217.84)b                              | 69.05 (11.43)b                  |
| IR 81955 H  | 0.25 (0.06)                     | 0.26 (0.01)              | 0.21 (0.03)              | 0.10 (0.03)              | 0.15 (0.05)              | 0.03 (0.03) | 0.75 (0.14)                                | 0.25 (0.14)                      | 680.50 (218.52)ab                             | 50.33 (14.16)ab                 |
| IR 81956 H  | 0.20 (0.08)                     | 0.16 (0.06)              | 0.26 (0.03)              | 0.25 (0.10)              | 0.12 (0.06)              | 0.01 (0.00) | 0.92 (0.08)                                | 0.08 (0.08)                      | 597.50 (89.06)ab                              | 55.34 (3.26)ab                  |
| IR 81958 H  | 0.18 (0.09)                     | 0.25 (0.07)              | 0.22 (0.05)              | 0.17 (0.07)              | 0.14 (0.05)              | 0.03 (0.01) | 0.91 (0.07)                                | 0.09 (0.07)                      | 548.50 (192.25)ab                             | 47.65 (12.39)ab                 |
| IR 80228 H  | 0.08 (0.03)                     | 0.15 (0.05)              | 0.33 (0.02)              | 0.24 (0.06)              | 0.14 (0.04)              | 0.06 (0.02) | 0.84 (0.08)                                | 0.16 (0.08)                      | 189.75 (93.02)ab                              | 21.54 (6.33)a                   |
| IR 80637 H  | 0.20 (0.04)                     | 0.25 (0.05)              | 0.30 (0.07)              | 0.16 (0.05)              | 0.08 (0.04)              | 0.01 (0.00) | 0.91 (0.05)                                | 0.25 (0.25)                      | 466.75 (161.55)ab                             | 47.97 (7.17)ab                  |
| IR 81949 H  | 0.21 (0.07)                     | 0.19 (0.05)              | 0.31 (0.06)              | 0.23 (0.05)              | 0.06 (0.01)              | 0.01 (0.00) | 0.95 (0.05)                                | 0.05 (0.05)                      | 391.25 (35.26)ab                              | 32.49 (4.80)ab cd               |
| IR 82363 H  | 0.15 (0.05)                     | 0.21 (0.06)              | 0.30 (0.07)              | 0.17 (0.04)              | 0.17 (0.05)              | 0.02 (0.01) | 0.80 (0.20)                                | 0.41 (0.21)                      | 264.75 (81.22)ab                              | 45.89 (8.86)ab*                 |
| IR 82391 H  | 0.36 (0.07)                     | 0.23 (0.04)              | 0.16 (0.03)              | 0.12 (0.03)              | 0.10 (0.02)              | 0.03 (0.01) | 0.69 (0.20)                                | 0.16 (0.06)                      | 254.00 (47.22)ab                              | 30.66 (6.28)ab                  |
| IR 84714 H  | 0.34 (0.08)                     | 0.23 (0.01)              | 0.17 (0.02)              | 0.14 (0.04)              | 0.10 (0.04)              | 0.02 (0.01) | 1.00 (0.00)                                | 0.19 (0.11)                      | 330.25 (77.29)ab                              | 33.47 (6.89)ab                  |
| IR 85471 H  | 0.11 (0.05)                     | 0.23 (0.05)              | 0.25 (0.06)              | 0.26 (0.03)              | 0.12 (0.02)              | 0.03 (0.01) | 0.85 (0.10)                                | 0.17 (0.10)*                     | 458.00 (170.76)ab                             | 52.52 (8.08)ab                  |
| IR 82385 H  | 0.09 (0.04)                     | 0.12 (0.02)*             | 0.31 (0.07)              | 0.22 (0.03)              | 0.17 (0.06)              | 0.08 (0.02) | 1.00 (0.00)b                               | 0.14 (0.08)                      | 188.00 (76.46)ab                              | 23.79 (7.07)a                   |
| F-Accession | 1.797ns                         | 0.693ns                  | 1.520ns                  | 1.208ns                  | 0.683ns                  | 1.575ns     | 0.818ns [13,34]                            | 1.546ns [13,34]                  | 2.455* [14,45]                                | 3.118*** [14,45]                |

1: Numbers are means (SEM)(N=4); DF = 14,84 unless indicated in square brackets; Wilk’s lambda for development stages = 1.167 and is not significant; ns = P > 0.05, \* = P < 0.05, \*\*\* = P < 0.005; lowercase letters indicate homogenous hybrid groups (Tukey: P > 0.05). 2: Blue = heterosis; green = heterobeltiosis for resistance; red = heterobeltiosis for susceptibility; Wilk’s lambda for development stages = 1.167 and is not significant.

Table S3: Oviposition by BPH and WBPH during choice experiments with hybrids and associated parental lines.

| Variety            | BPH                             |                               |                                     | WBPH                            |                             |                                     |
|--------------------|---------------------------------|-------------------------------|-------------------------------------|---------------------------------|-----------------------------|-------------------------------------|
|                    | Clusters per Plant <sup>1</sup> | Eggs per Plant <sup>1,2</sup> | Plant Biomass (dry mg) <sup>2</sup> | Clusters per Plant <sup>1</sup> | Eggs per Plant <sup>1</sup> | Plant Biomass (dry mg) <sup>1</sup> |
| IR82396 H          | 17.50 (10.25)                   | 85.67 (44.28)                 | 0.47 (0.03)                         | 16.17 (3.89)                    | 110.50 (27.95)              | 0.33 (0.05)                         |
| IR80156 A          | 9.83 (3.75)                     | 70.50 (28.92)                 | 0.41 (0.03)                         | 17.17 (5.95)                    | 115.67 (40.65)              | 0.31 (0.04)                         |
| IR80156 B          | 25.33 (10.99)                   | 142.00 (56.21)                | 0.54 (0.05)                         | 5.00 (2.25)                     | 39.67 (17.12)               | 0.26 (0.05)                         |
| IR46R              | 21.67 (12.28)                   | 123.17 (63.05)                | 0.52 (0.06)                         | 14.33 (4.16)                    | 130.50 (35.45)              | 0.31 (0.03)                         |
| F-line             | 0.460ns                         | 0.483ns                       | 1.704ns                             | 0.369ns                         | 1.346ns                     | 0.361ns                             |
| F-biomass          | 0.202ns                         | 0.288ns                       |                                     | 0.879ns                         | 0.765ns                     |                                     |
| IR82391 H          | 28.67 (10.05)c                  | 160.17 (51.49)b[ht}           | 0.48 (0.05)                         | 11.83 (4.91)                    | 126.00 (31.88)              | 0.33 (0.02)                         |
| IR79156 A          | 18.17 (7.27)bc                  | 112.67 (42.98)ab              | 0.45 (0.05)                         | 7.83 (3.23)                     | 59.67 (23.81)               | 0.26 (0.04)                         |
| IR79156 B          | 5.33 (2.80)ab                   | 31.33 (17.80)a                | 0.38 (0.06)                         | 5.67 (2.64)                     | 48.00 (24.19)               | 0.21 (0.03)                         |
| IR60819-34-2 R     | 8.00 (3.84)a                    | 43.50 (23.85)a                | 0.47 (0.04)                         | 12.50 (2.18)                    | 119.83 (22.48)              | 0.32 (0.03)                         |
| F-line             | 7.333***                        | 6.227***                      | 0.901ns                             | 0.476ns                         | 1.309ns                     | 2.476ns                             |
| F-biomass          | 1.480ns                         | 1.926ns                       |                                     | 1.102ns                         | 0.482ns                     |                                     |
| IR84714 H          | 6.50 (3.45)                     | 45.67 (24.03)a[ht]'           | 0.48 (0.07)                         | 6.17 (2.18)ab                   | 50.83 (19.75)ab             | 0.41 (0.04)                         |
| IR80559 A          | 27.00 (13.66)                   | 171.00 (72.83)b               | 0.54 (0.02)                         | 21.33 (6.99)b                   | 173.67 (50.53)b             | 0.41 (0.04)                         |
| IR80559 B          | 10.00 (3.47)                    | 59.83 (21.02)ab               | 0.44 (0.02)                         | 13.67 (4.00)b                   | 97.50 (27.58)ab             | 0.30 (0.05)                         |
| IR60819-34-2 R     | 15.50 (8.44)                    | 90.50 (49.66)ab               | 0.48 (0.04)                         | 2.33 (0.84)a                    | 19.50 (8.68)a               | 0.31 (0.03)                         |
| F-line             | 2.113ns                         | 3.403*                        | 0.962ns                             | 5.460**                         | 5.192**                     | 2.047ns                             |
| F-biomass          | 0.176ns                         | 0.873ns                       |                                     | 4.641*                          | 3.884ns                     |                                     |
| IR85471 H          | 5.83 (3.76)                     | 28.83 (18.16)                 | 0.44 (0.04)                         | 5.50 (2.17)                     | 40.33 (16.13)               | 0.37 (0.04)                         |
| IR80564 A          | 13.83 (6.93)                    | 90.67 (44.65)                 | 0.45 (0.05)                         | 13.50 (3.65)                    | 105.17 (29.29)              | 0.29 (0.03)                         |
| IR80564 B          | 11.50 (6.35)                    | 62.67 (31.38)                 | 0.34 (0.03)                         | 16.67 (5.97)                    | 121.33 (42.60)              | 0.28 (0.02)                         |
| IR60819-34-2 R     | 15.33 (6.30)                    | 96.67 (40.35)                 | 0.47 (0.02)                         | 6.00 (1.63)                     | 53.83 (13.35)               | 0.32 (0.05)                         |
| F-line             | 0.863ns                         | 1.004ns                       | 2.445ns                             | 1.227ns                         | 0.921ns                     | 0.995ns                             |
| F-biomass          | 0.212ns                         | 0.429ns                       |                                     | 0.250ns                         | 0.151ns                     |                                     |
| IR81954 H          | 32.17 (12.78)                   | 153.00 (71.58)                | 0.58 (0.02)b                        | 14.00 (5.60)                    | 130.33 (45.61)              | 0.41 (0.03)                         |
| IR70369 A          | 14.17 (2.79)                    | 105.17 (27.26)                | 0.52 (0.03)b                        | 14.33 (4.65)                    | 116.67 (35.77)              | 0.32 (0.06)                         |
| IR70369 B          | 8.33 (3.11)                     | 53.17 (25.58)                 | 0.32 (0.09)a                        | 2.50 (1.17)                     | 23.17 (13.04)               | 0.22 (0.09)                         |
| IR72889-46-3-2-1 R | 25.17 (10.42)                   | 146.67 (48.47)                | 0.44 (0.03)ab                       | 13.50 (5.65)                    | 117.83 (51.93)              | 0.24 (0.06)                         |
| F-line             | 0.160ns                         | 0.806ns                       | 5.311**                             | 0.559ns                         | 0.612ns                     | 1.826ns                             |
| F-biomass          | 4.061ns                         | 1.477ns                       |                                     | 0.414ns                         | 0.857ns                     |                                     |
| IR80637 H          | 18.33 (7.17)                    | 98.17 (34.83)                 | 0.47 (0.04)                         | 18.00 (6.33)                    | 147.83 (53.81)              | 0.30 (0.06)                         |

|                    |               |                |             |              |                |             |
|--------------------|---------------|----------------|-------------|--------------|----------------|-------------|
| IR73328 A          | 19.67 (12.51) | 99.17 (64.27)  | 0.48 (0.05) | 7.00 (3.01)  | 52.33 (24.51)  | 0.26 (0.06) |
| IR73328 B          | 20.00 (9.58)  | 144.67 (70.83) | 0.44 (0.05) | 13.67 (3.84) | 98.83 (31.62)  | 0.24 (0.06) |
| IR73013-95-1-3-2 R | 18.50 (6.40)  | 109.83 (48.69) | 0.36 (0.02) | 5.83 (2.41)  | 56.67 (24.44)  | 0.28 (0.03) |
| F-line             | 0.328ns       | 0.328ns        | 1.577ns     | 1.544ns      | 1.544ns        | 0.262ns     |
| F-biomass          | 2.275ns       | 2.275ns        |             | 0.001ns      | 0.001ns        |             |
| IR82385 H          | 9.50 (3.65)   | 59.50 (24.48)  | 0.46 (0.05) | 9.17 (3.13)  | 86.17 (37.24)  | 0.32 (0.04) |
| IR79125 A          | 30.50 (18.11) | 137.50 (81.20) | 0.44 (0.06) | 10.16 (2.89) | 90.67 (24.53)  | 0.25 (0.03) |
| IR79125 B          | 16.83 (7.88)  | 90.00 (33.97)  | 0.33 (0.04) | 4.00 (1.21)  | 37.17 (15.41)  | 0.27 (0.03) |
| IR73717-46-1-3-3 R | 25.83 (15.51) | 142.33 (87.20) | 0.35 (0.03) | 14.83 (5.48) | 106.33 (38.06) | 0.28 (0.04) |
| F-line             | 0.626ns       | 0.421ns        | 1.831ns     | 1.718ns      | 2.937ns        | 0.585ns     |
| F-biomass          | 1.459ns       | 0.949ns        |             | 0.363ns      | 0.229ns        |             |
| IR 82363 H         | 10.50 (8.79)  | 58.33 (51.04)  | 0.46 (0.03) | 13.33 (2.80) | 106.50 (26.81) | 0.31 (0.07) |
| IR68897 A          | 14.33 (5.87)  | 92.67 (36.52)  | 0.39 (0.03) | 11.50 (3.79) | 94.83 (31.59)  | 0.37 (0.03) |
| IR68897 B          | 18.33 (13.06) | 77.50 (50.24)  | 0.38 (0.03) | 7.50 (4.27)  | 47.00 (27.58)  | 0.31 (0.05) |
| SRT 3 R            | 32.17 (14.66) | 184.33 (68.34) | 0.46 (0.04) | 12.67 (4.27) | 97.83 (40.83)  | 0.37 (0.03) |
| F-line             | 1.951ns       | 1.677ns        | 1.513ns     | 1.455ns      | 2.168ns        | 0.537ns     |
| F-biomass          | 0.041ns       | 0.022ns        |             | 0.008ns      | 0.004ns        |             |

1: Numbers are means (SEM) (N = 6); DF = 3,19 for accessions, 1,19 for covariate ‘biomass’; ns = P > 0.05, \* = P < 0.05, \*\* = P < 0.01, \*\*\* = P < 0.005; lowercase letters indicate homogenous variety groups (Tukey P > 0.05); 2: ht = heterosis for resistance; ht’ = heterosis for resistance associated with plant size

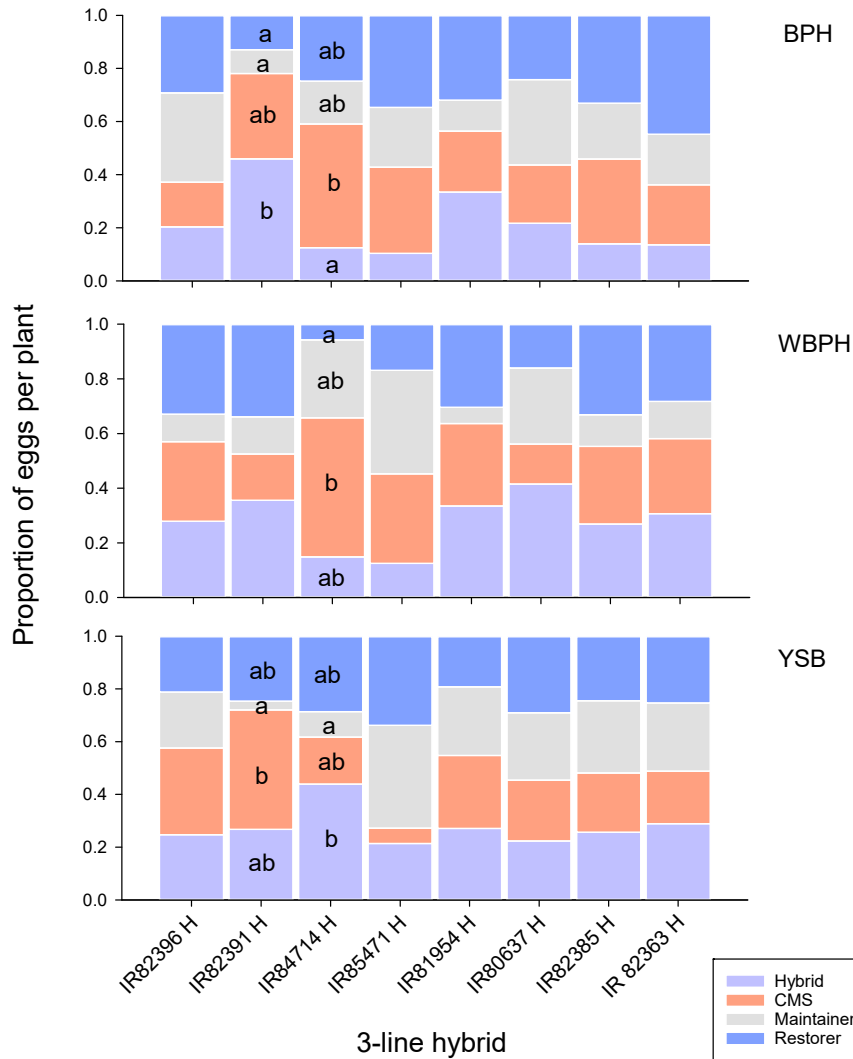

Figure S1: Proportion of eggs laid on hybrid rice and associated parental lines in a series of choice experiments (N=6). Significant plant-type effects on the proportions of eggs laid are indicated by lowercase letters as relevant to homogenous plant groups. Note that IR82391H shows heterobeltiosis for susceptibility to BPH (relative to the maintainer line [B-line]) or heterosis (relative to the CMS-line [A-line]); IR84714H shows heterosis for resistance to BPH (relative to the CMS-line [A-line]). There are no other cases of heterosis for resistance. BPH = brown planthopper, WBPH = whitebacked planthopper, YSB = yellow stemborer.

Table S4: Results from bioassays with WBPH on 15 hybrid rice varieties and their female (A and B lines) and male (restorer/R lines) parents. Summarized information from this table is presented in Table S5 and Figure 1.

| Accession          | Development Stages <sup>1</sup> |             |                 |                |                |                | Brachypterous<br>(Proportion) <sup>1</sup> | Female<br>(Proportion) <sup>1</sup> | Total Number of<br>Individuals <sup>1</sup> | Total Dry Weight <sup>1,2</sup> |
|--------------------|---------------------------------|-------------|-----------------|----------------|----------------|----------------|--------------------------------------------|-------------------------------------|---------------------------------------------|---------------------------------|
|                    | 1st instars                     | 2nd instars | 3rd instars     | 4th instars    | 5th instars    | Adults         |                                            |                                     |                                             |                                 |
| IR82396H           | 0.17 (0.06)                     | 0.25 (0.04) | 0.25 (0.05)b    | 0.09 (0.00)    | 0.14 (0.05)    | 0.05 (0.01)a   | 0.87 (0.10)                                | 0.48 (0.26)                         | 207.67 (77.41)b                             | 21.22 (9.22)                    |
| IR80156A           | 0.02 (0.01)                     | 0.12 (0.08) | 0.13 (0.08)ab   | 0.11 (0.04)    | 0.28 (0.09)    | 0.33 (0.16)ab  | 0.52 (0.04)                                | 0.57 (0.05)                         | 72.00 (20.42)ab                             | 11.03 (0.81)                    |
| IR80156B           | 0.00 (0.00)                     | 0.00 (0.00) | 0.03 (0.02)a    | 0.09 (0.03)    | 0.29 (0.09)    | 0.59 (0.13)ab  | 0.63 (0.08)                                | 0.67 (0.09)                         | 55.25 (10.66)a                              | 16.65 (3.70)                    |
| IR46R              | 0.00 (0.00)                     | 0.00 (0.00) | 0.00 (0.00)a    | 0.03 (0.07)    | 0.33 (0.12)    | 0.64 (0.14)b   | 0.81 (0.11)                                | 0.67 (0.12)                         | 23.00 (8.26)a                               | 6.07 (2.16)                     |
| F-Accession        |                                 |             | 7.115*** (3,11) | 1.374ns (3,11) | 0.649ns (3,11) | 3.726* (3,11)  | 3.229ns (3,11)                             | 0.419ns (3,11)                      | 5.487* (3,11)                               | 2.298ns (3,11)                  |
| IR 82391 H         | 0.00 (0.00)                     | 0.06 (0.06) | 0.04 (0.04)     | 0.13 (0.10)    | 0.20 (0.12)    | 0.56 (0.26)    | 0.64 (0.13)                                | 0.69 (0.11)                         | 21.50 (10.14)                               | 3.36 (1.05)                     |
| IR 79156 A         | 0.00 (0.00)                     | 0.00 (0.00) | 0.00 (0.00)     | 0.09 (0.05)    | 0.44 (0.17)    | 0.47 (0.21)    | 0.35 (0.14)                                | 0.57 (0.17)                         | 19.75 (8.93)                                | 4.61 (1.87)                     |
| IR 79156 B         | 0.00 (0.00)                     | 0.02 (0.02) | 0.19 (0.11)     | 0.13 (0.05)    | 0.23 (0.11)    | 0.43 (0.20)    | 0.57 (0.19)                                | 0.57 (0.09)                         | 62.50 (33.94)                               | 11.08 (4.50)                    |
| IR60819-34-2       | 0.00 (0.00)                     | 0.03 (0.03) | 0.08 (0.08)     | 0.14 (0.05)    | 0.29 (0.04)    | 0.45 (0.13)    | 0.54 (0.19)                                | 0.57 (0.08)                         | 46.50 (16.24)                               | 6.89 (2.26)                     |
| F-Accession        |                                 |             |                 | 0.128ns        | 0.840ns        | 0.080ns        | 1.112ns                                    | 0.260ns                             | 1.065ns                                     | 1.544ns                         |
| IR 84714 H         | 0.00 (0.00)                     | 0.00 (0.09) | 0.09 (0.06)     | 0.08 (0.07)    | 0.24 (0.06)    | 0.59 (0.15)    | 0.37 (0.14)                                | 0.43 (0.17)                         | 41.00 (21.08)                               | 5.81 (3.57)                     |
| IR 80559 A         | 0.00 (0.00)                     | 0.04 (0.02) | 0.15 (0.09)     | 0.10 (0.07)    | 0.28 (0.07)    | 0.44 (0.17)    | 0.37 (0.17)                                | 0.38 (0.08)                         | 109.25 (36.18)                              | 20.81 (5.29)                    |
| IR 80559 B         | 0.00 (0.00)                     | 0.04 (0.03) | 0.18 (0.09)     | 0.14 (0.06)    | 0.21 (0.09)    | 0.42 (0.20)    | 0.57 (0.16)                                | 0.59 (0.07)                         | 103.25 (42.83)                              | 19.06 (5.81)                    |
| IR60819-34-2 R     | 0.00 (0.00)                     | 0.00 (0.00) | 0.03 (0.03)     | 0.18 (0.09)    | 0.32 (0.11)    | 0.48 (0.18)    | 0.31 (0.15)                                | 0.62 (0.09)                         | 68.75 (25.21)                               | 16.73 (7.23)                    |
| F-Accession        |                                 |             | 0.885ns         | 0.333ns        | 0.273ns        | 0.193ns        | 1.029ns                                    | 1.164ns                             | 0.961ns                                     | 1.432ns                         |
| IR 85471 H         | 0.04 (0.04)                     | 0.20 (0.02) | 0.30 (0.09)     | 0.10 (0.04)    | 0.25 (0.08)    | 0.11 (0.03)    | 0.37 (0.19)                                | 0.24 (0.06)a                        | 195.25 (100.51)                             | 41.51 (17.42)                   |
| IR 80564 A         | 0.07 (0.02)                     | 0.17 (0.06) | 0.16 (0.06)     | 0.15 (0.05)    | 0.17 (0.07)    | 0.28 (0.24)    | 0.28 (0.16)                                | 0.42 (0.08)ab                       | 80.25 (26.24)                               | 11.56 (3.32)                    |
| IR 80564 B         | 0.00 (0.00)                     | 0.10 (0.10) | 0.12 (0.12)     | 0.34 (0.07)    | 0.25 (0.07)    | 0.20 (0.04)    | 0.52 (0.18)                                | 0.57 (0.13)ab                       | 43.33 (21.37)                               | 5.89 (2.76)                     |
| IR60819-34-2 R     | 0.00 (0.00)                     | 0.00 (0.00) | 0.03 (0.03)     | 0.18 (0.09)    | 0.32 (0.11)    | 0.48 (0.18)    | 0.31 (0.15)                                | 0.62 (0.09)b                        | 68.75 (25.21)                               | 16.73 (7.23)                    |
| F-Accession        |                                 |             | 2.580ns (3,11)  | 2.002ns (3,11) | 0.529ns (3,11) | 1.004ns (3,11) | 0.397ns (3,11)                             | 4.072* (3,11)                       | 1.347ns (3,11)                              | 2.288ns (3,11)                  |
| IR 81954 H         | 0.00 (0.00)                     | 0.03 (0.02) | 0.10 (0.05)     | 0.22 (0.04)    | 0.38 (0.07)    | 0.27 (0.08)    | 0.27 (0.11)a                               | 0.33 (0.05)                         | 68.00 (28.69)                               | 13.97 (5.31)                    |
| IR 70369 A         | 0.00 (0.00)                     | 0.10 (0.08) | 0.16 (0.10)     | 0.10 (0.06)    | 0.11 (0.07)    | 0.52 (0.28)    | 0.75 (0.13)b                               | 0.47 (0.21)                         | 126.00 (81.45)                              | 26.76 (12.82)                   |
| IR 70369 B         | 0.00 (0.00)                     | 0.00 (0.00) | 0.07 (0.07)     | 0.03 (0.02)    | 0.51 (0.07)    | 0.39 (0.05)    | 0.47 (0.09)ab                              | 0.61 (0.21)                         | 66.67 (20.50)                               | 15.34 (6.64)                    |
| IR72889-46-3-2-1 R | 0.00 (0.00)                     | 0.02 (0.02) | 0.08 (0.08)     | 0.18 (0.07)    | 0.26 (0.12)    | 0.46 (0.22)    | 0.38 (0.03)a                               | 0.38 (0.03)                         | 71.00 (31.12)                               | 13.27 (5.03)                    |
| F-Accession        |                                 |             |                 | 1.970ns (3,10) | 3.576ns (3,10) | 0.248ns (3,10) | 6.927** (3,9)                              | 0.727ns (3,9)                       | 0.317ns (3,10)                              | 0.572ns (3,10)                  |
| IR 80637 H         | 0.00 (0.00)                     | 0.03 (0.02) | 0.11 (0.07)     | 0.10 (0.06)    | 0.22 (0.06)    | 0.54 (0.19)    | 0.49 (0.09)                                | 0.54 (0.07)                         | 79.75 (40.53)                               | 18.75 (9.89)                    |
| IR 73328 A         | 0.00 (0.00)                     | 0.00 (0.00) | 0.00 (0.00)     | 0.03 (0.03)    | 0.10 (0.05)    | 0.87 (0.06)    | 0.58 (0.06)                                | 0.58 (0.06)                         | 26.25 (10.96)                               | 7.35 (3.82)                     |



|                       |             |             |                |                |                |                |                |                |                |                |
|-----------------------|-------------|-------------|----------------|----------------|----------------|----------------|----------------|----------------|----------------|----------------|
| IR 73328 B            | 0.00 (0.00) | 0.00 (0.00) | 0.02 (0.02)    | 0.06 (0.04)    | 0.19 (0.07)    | 0.73 (0.11)    | 0.47 (0.11)    | 0.55 (0.12)    | 49.75 (10.85)  | 19.10 (4.41)   |
| IR73013-95-1-3-2 R    | 0.00 (0.00) | 0.07 (0.07) | 0.13 (0.13)    | 0.05 (0.05)    | 0.18 (0.11)    | 0.56 (0.28)    | 0.25 (0.18)    | 0.25 (0.18)    | 79.33 (71.35)  | 8.71 (6.74)    |
| F-Accession           |             |             |                | 0.427ns (3,11) | 0.612ns (3,11) | 0.941ns (3,11) | 1.456ns (3,11) | 1.838ns (3,11) | 0.522ns (3,11) | 0.898ns (3,11) |
| IR 82385 H            | 0.00 (0.00) | 0.03 (0.03) | 0.06 (0.06)    | 0.07 (0.06)    | 0.32 (0.09)    | 0.52 (0.18)    | 0.45 (0.11)    | 0.49 (0.08)    | 51.50 (21.56)  | 14.82 (6.20)   |
| IR 79125 A            | 0.00 (0.00) | 0.00 (0.00) | 0.00 (0.00)    | 0.00 (0.00)    | 0.45 (0.22)    | 0.55 (0.22)    | 0.64 (0.22)    | 0.64 (0.22)    | 8.33 (2.19)    | 2.19 (0.77)    |
| IR 79125 B            | 0.08 (0.08) | 0.14 (0.05) | 0.20 (0.08)    | 0.33 (0.17)    | 0.23 (0.12)    | 0.02 (0.01)    | 1.00 (0.00)    | 1.00 (0.00)    | 45.25 (17.38)  | 6.68 (2.20)    |
| IR73717-46-1-3-3 R    | 0.00 (0.00) | 0.00 (0.00) | 0.00 (0.00)    | 0.22 (0.01)    | 0.40 (0.15)    | 0.38 (0.16)    | 0.68 (0.04)    | 0.78 (0.06)    | 43.00 (18.25)  | 9.68 (3.24)    |
| F-Accession           |             |             |                |                | 0.462ns (3,10) | 2.663ns (3,10) | 2.449ns (3,8)  | 2.664ns (3,8)  | 1.083ns (3,10) | 1.686ns (3,10) |
| IR 82363 H            | 0.00 (0.00) | 0.00 (0.00) | 0.14 (0.10)    | 0.20 (0.10)    | 0.41 (0.07)b   | 0.25 (0.10)    | 0.28 (0.15)    | 0.50 (0.00)    | 67.67 (59.18)  | 26.13 (22.66)  |
| IR 68897 A            | 0.00 (0.00) | 0.00 (0.00) | 0.00 (0.00)    | 0.07 (0.04)    | 0.48 (0.11)b   | 0.45 (0.09)    | 0.60 (0.10)    | 0.67 (0.17)    | 8.33 (2.03)    | 1.89 (0.48)    |
| IR 68897 B            | 0.00 (0.00) | 0.00 (0.00) | 0.17 (0.17)    | 0.00 (0.00)    | 0.32 (0.04)ab  | 0.51 (0.13)    | 0.36 (0.22)    | 0.36 (0.22)    | 23.67 (12.20)  | 13.84 (9.44)   |
| SRT 3 R               | 0.02 (0.02) | 0.06 (0.06) | 0.11 (0.09)    | 0.06 (0.04)    | 0.14 (0.07)a   | 0.61 (0.22)    | 0.72 (0.05)    | 0.72 (0.05)    | 77.50 (51.37)  | 12.65 (2.97)   |
| F-Accession           |             |             | 0.448ns (3,9)  | 2.118ns (3,9)  | 3.925* (3,9)   | 0.863ns (3,9)  | 2.455ns (3,9)  | 1.561ns (3,9)  | 0.622ns (3,9)  | 0.714ns (3,9)  |
| IR 80814 H            | 0.00 (0.00) | 0.15 (0.10) | 0.27 (0.05)    | 0.18 (0.06)    | 0.23 (0.09)ab  | 0.17 (0.06)    | 0.29 (0.10)a   | 0.71 (0.10)    | 99.25 (27.07)  | 13.37 (3.90)   |
| IR 70369 A            | 0.00 (0.00) | 0.10 (0.08) | 0.16 (0.10)    | 0.10 (0.06)    | 0.11 (0.07)a   | 0.52 (0.28)    | 0.75 (0.13)b   | 0.47 (0.21)    | 126.00 (81.45) | 26.76 (12.82)  |
| IR 70369 B            | 0.00 (0.00) | 0.00 (0.00) | 0.07 (0.07)    | 0.03 (0.02)    | 0.51 (0.07)b   | 0.39 (0.05)    | 0.47 (0.09)ab  | 0.61 (0.21)    | 66.67 (20.50)  | 15.34 (6.64)   |
| IR69712-154-2-3-1-3 R | 0.00 (0.00) | 0.04 (0.04) | 0.06 (0.06)    | 0.17 (0.08)    | 0.25 (0.09)ab  | 0.48 (0.20)    | 0.68 (0.06)ab  | 0.32 (0.06)    | 67.25 (34.75)  | 8.20 (0.54)    |
| F-Accession           |             |             | 1.761ns (3,11) | 1.258ns (3,11) | 3.599* (3,11)  | 0.772ns (3,11) | 4.934* (3,10)  | 1.599ns (3,10) | 0.320ns (3,11) | 1.112ns (3,11) |
| IR 81955 H            | 0.00 (0.00) | 0.08 (0.05) | 0.21 (0.08)    | 0.21 (0.01)    | 0.36 (0.07)ab  | 0.14 (0.07)    | 0.47 (0.21)    | 0.53 (0.21)    | 45.25 (15.94)  | 5.49 (1.45)    |
| IR 70369 A            | 0.00 (0.00) | 0.10 (0.08) | 0.16 (0.10)    | 0.10 (0.06)    | 0.11 (0.07)a   | 0.52 (0.28)    | 0.75 (0.13)    | 0.47 (0.21)    | 126.00 (81.45) | 26.76 (12.82)  |
| IR 70369 B            | 0.00 (0.00) | 0.00 (0.00) | 0.07 (0.07)    | 0.03 (0.02)    | 0.51 (0.07)b   | 0.39 (0.05)    | 0.47 (0.09)    | 0.61 (0.21)    | 66.67 (20.50)  | 15.34 (6.64)   |
| IR72998-93-3-3-2 R    | 0.00 (0.00) | 0.04 (0.04) | 0.03 (0.03)    | 0.18 (0.11)    | 0.38 (0.04)ab  | 0.37 (0.14)    | 0.52 (0.14)    | 0.48 (0.14)    | 34.25 (12.22)  | 9.63 (1.29)    |
| F-Accession           |             |             | 1.014ns (3,10) | 1.764ns (3,10) | 6.319* (3,10)  | 0.896ns (3,10) | 0.650ns (3,9)  | 0.099ns (3,9)  | 0.847ns (3,10) | 1.465ns (3,10) |
| IR 81956 H            | 0.07 (0.07) | 0.17 (0.12) | 0.25 (0.15)    | 0.09 (0.06)    | 0.12 (0.03)a   | 0.30 (0.26)    | 0.51 (0.29)    | 0.49 (0.29)    | 121.25 (70.18) | 14.97 (4.01)   |
| IR 70369 A            | 0.00 (0.00) | 0.10 (0.08) | 0.16 (0.10)    | 0.10 (0.06)    | 0.11 (0.07)a   | 0.52 (0.28)    | 0.75 (0.13)    | 0.47 (0.21)    | 126.00 (81.45) | 26.76 (12.82)  |
| IR 70369 B            | 0.00 (0.00) | 0.00 (0.00) | 0.07 (0.07)    | 0.03 (0.02)    | 0.51 (0.07)b   | 0.39 (0.05)    | 0.47 (0.09)    | 0.61 (0.21)    | 66.67 (20.50)  | 15.34 (6.64)   |
| IR73003-73-2-3-2 R    | 0.00 (0.00) | 0.00 (0.00) | 0.00 (0.00)    | 0.07 (0.07)    | 0.18 (0.13)ab  | 0.75 (0.20)    | 0.52 (0.11)    | 0.48 (0.11)    | 25.75 (19.23)  | 8.37 (4.98)    |
| F-Accession           |             |             | 1.135ns (3,9)  | 0.271ns (3,9)  | 5.299* (3,9)   | 0.672ns (3,9)  | 0.528ns (3,8)  | 0.094ns (3,8)  | 0.680ns (3,9)  | 0.755ns (3,9)  |
| IR 81958 H            | 0.00 (0.00) | 0.00 (0.00) | 0.00 (0.00)    | 0.09 (0.07)    | 0.33 (0.16)    | 0.59 (0.21)    | 0.32 (0.03)    | 0.68 (0.03)    | 28.50 (16.78)  | 12.29 (6.36)   |
| IR 70369 A            | 0.00 (0.00) | 0.10 (0.08) | 0.16 (0.10)    | 0.10 (0.06)    | 0.11 (0.17)    | 0.52 (0.28)    | 0.75 (0.13)    | 0.47 (0.21)    | 126.00 (81.45) | 26.76 (12.82)  |
| IR 70369 B            | 0.00 (0.00) | 0.00 (0.00) | 0.07 (0.07)    | 0.03 (0.02)    | 0.51 (0.17)    | 0.39 (0.05)    | 0.47 (0.09)    | 0.61 (0.21)    | 66.67 (20.50)  | 15.34 (6.64)   |
| IR73013-95-1-3-2 R    | 0.00 (0.00) | 0.07 (0.07) | 0.13 (0.13)    | 0.05 (0.05)    | 0.18 (0.11)    | 0.56 (0.28)    | 0.25 (0.18)    | 0.25 (0.18)    | 79.33 (71.35)  | 8.71 (6.74)    |

| F-Accession          |             |             | 0.613ns (3,9)  | 0.806ns (3,9)  | 2.921ns (3,9)  | 0.135ns (3,9)  | 3.373ns (3,8)  | 1.202ns (3,8)  | 0.555ns (3,8)  | 0.685ns (3,8)  |
|----------------------|-------------|-------------|----------------|----------------|----------------|----------------|----------------|----------------|----------------|----------------|
| IR 80228 H           | 0.00 (0.00) | 0.02 (0.02) | 0.16 (0.13)    | 0.07 (0.04)    | 0.27 (0.09)    | 0.48 (0.18)    | 0.59 (0.14)    | 0.41 (0.14)    | 95.00 (58.81)  | 12.43 (4.04)   |
| IR 70369 A           | 0.00 (0.00) | 0.10 (0.08) | 0.16 (0.10)    | 0.10 (0.06)    | 0.11 (0.07)    | 0.52 (0.28)    | 0.75 (0.13)    | 0.47 (0.21)    | 126.00 (81.45) | 26.76 (12.82)  |
| IR 70369 B           | 0.00 (0.00) | 0.00 (0.00) | 0.07 (0.07)    | 0.03 (0.02)    | 0.51 (0.07)    | 0.39 (0.05)    | 0.47 (0.09)    | 0.61 (0.21)    | 66.67 (20.50)  | 15.34 (6.64)   |
| IR73885-1-4-3-2-1-6R | 0.00 (0.00) | 0.00 (0.00) | 0.01 (0.01)    | 0.09 (0.04)    | 0.24 (0.15)    | 0.66 (0.19)    | 0.54 (0.06)    | 0.46 (0.06)    | 39.50 (13.38)  | 12.00 (3.45)   |
| F-Accession          |             |             | 0.650ns (3,11) | 0.379ns (3,11) | 2.269ns (3,11) | 0.296ns (3,11) | 0.971ns (3,10) | 0.266ns (3,10) | 0.476ns (3,11) | 0.814ns (3,11) |
| IR 81949 H           | 0.00 (0.00) | 0.01 (0.00) | 0.10 (0.06)    | 0.08 (0.04)    | 0.29 (0.06)    | 0.51 (0.14)    | 0.44 (0.03)    | 0.56 (0.03)    | 70.25 (10.16)  | 13.70 (1.98)   |
| IR 68897 A           | 0.00 (0.00) | 0.00 (0.00) | 0.00 (0.00)    | 0.07 (0.04)    | 0.48 (0.11)    | 0.45 (0.09)    | 0.60 (0.10)    | 0.67 (0.07)    | 8.33 (2.03)    | 1.89 (0.48)    |
| IR 68897 B           | 0.00 (0.00) | 0.00 (0.00) | 0.17 (0.17)    | 0.00 (0.00)    | 0.32 (0.04)    | 0.51 (0.13)    | 0.36 (0.22)    | 0.36 (0.02)    | 23.67 (12.20)  | 13.84 (9.44)   |
| IR73013-95-1-3-2 R   | 0.00 (0.00) | 0.07 (0.07) | 0.13 (0.13)    | 0.05 (0.05)    | 0.18 (0.11)    | 0.56 (0.28)    | 0.25 (0.18)    | 0.25 (0.18)    | 79.33 (71.35)  | 8.71 (6.74)    |
| F-Accession          |             |             | 0.444ns (3,9)  | 0.806ns (3,9)  | 2.123ns (3,9)  | 0.064ns (3,9)  | 1.048ns (3,9)  | 1.466ns (3,9)  | 1.047ns (3,9)  | 1.055ns (3,9)  |
| IR 86167 H           | 0.00 (0.00) | 0.01 (0.01) | 0.10 (0.05)    | 0.15 (0.04)    | 0.31 (0.09)    | 0.43 (0.15)    | 0.39 (0.11)    | 0.61 (0.11)    | 48.25 (16.84)  | 12.25 (1.09)   |
| IR80156A             | 0.02 (0.01) | 0.12 (0.08) | 0.13 (0.08)    | 0.11 (0.04)    | 0.28 (0.09)    | 0.33 (0.16)    | 0.52 (0.04)    | 0.57 (0.05)    | 72.00 (20.42)  | 11.03 (0.81)   |
| IR80156B             | 0.00 (0.00) | 0.00 (0.00) | 0.03 (0.02)    | 0.09 (0.03)    | 0.29 (0.09)    | 0.59 (0.13)    | 0.63 (0.08)    | 0.67 (0.09)    | 55.25 (10.66)  | 16.65 (3.70)   |
| IR73013-95-1-3-2 R   | 0.00 (0.00) | 0.07 (0.07) | 0.13 (0.13)    | 0.05 (0.05)    | 0.18 (0.11)    | 0.56 (0.28)    | 0.25 (0.18)    | 0.25 (0.18)    | 79.33 (71.35)  | 8.71 (6.74)    |
| F-Accession          |             |             | 0.466ns [3,10] | 0.885ns [3,10] | 0.310ns [3,10] | 0.506ns [3,10] | 2.522ns [3,10] | 2.913ns [3,10] | 0.203ns [3,10] | 0.891ns [3,10] |

1: Numbers are means (SEM)(N=4); DF = 4,15 unless indicated in square brackets, ns = P > 0.05, \* = P < 0.05; lowercase letters indicate homogenous line groups (Tukey: P > 0.05). 2: Note that some of the results for WBPH biomass have been summarized by plant-type and presented in a related paper by Horgan et al (2016); the data and information by accession has not been previously published.

Table S5: Responses by WBPH to 15 hybrid rice varieties indicating potential sources of resistance/susceptibility based on heterosis or heterbeltiosis with parental lines. Information related to the parental lines and statistical results used to determine heterosis/heterobeltiosis are presented in Table S4. Data is summarized in Figure 1 of the main text.

| Accession  | Development Stages <sup>1</sup> |                          |                            |                          |                            |                       | Brachypterous<br>(Proportion) <sup>1</sup> | Female (Proportion) <sup>1</sup> | Total Number of<br>Individuals <sup>1</sup> | Total Dry Weight (mg) <sup>1</sup> |
|------------|---------------------------------|--------------------------|----------------------------|--------------------------|----------------------------|-----------------------|--------------------------------------------|----------------------------------|---------------------------------------------|------------------------------------|
|            | 1st instars <sup>1</sup>        | 2nd instars <sup>1</sup> | 3rd instars <sup>1,2</sup> | 4th instars <sup>1</sup> | 5th instars <sup>1,2</sup> | Adults <sup>1,2</sup> |                                            |                                  |                                             |                                    |
| IR82396H   | 0.17 (0.06)b                    | 0.25 (0.04)b             | 0.25 (0.05)                | 0.09 (0.00)              | 0.14 (0.05)                | 0.05 (0.01)           | 0.87 (0.10)                                | 0.48 (0.26)                      | 207.67 (77.41)                              | 21.22 (9.22)                       |
| IR 86167 H | 0.00 (0.00)a                    | 0.01 (0.01)ab            | 0.10 (0.05)                | 0.15 (0.04)              | 0.31 (0.09)                | 0.43 (0.15)           | 0.39 (0.11)                                | 0.61 (0.11)                      | 48.25 (16.84)                               | 12.25 (1.09)                       |
| IR 81954 H | 0.00 (0.00)a                    | 0.03 (0.02)ab            | 0.10 (0.05)                | 0.22 (0.04)              | 0.38 (0.07)                | 0.27 (0.08)           | 0.27 (0.11)a                               | 0.33 (0.05)                      | 68.00 (28.69)                               | 13.97 (5.31)                       |
| IR 80814 H | 0.00 (0.00)a                    | 0.15 (0.10)ab            | 0.27 (0.05)                | 0.18 (0.06)              | 0.23 (0.09)                | 0.17 (0.06)           | 0.29 (0.10)a                               | 0.71 (0.10)                      | 99.25 (27.07)                               | 13.37 (3.90)                       |
| IR 81955 H | 0.00 (0.00)a                    | 0.08 (0.05)ab            | 0.21 (0.08)                | 0.21 (0.01)              | 0.36 (0.07)                | 0.14 (0.07)           | 0.47 (0.21)                                | 0.53 (0.21)                      | 45.25 (15.94)                               | 5.49 (1.45)                        |
| IR 81956 H | 0.07 (0.07)ab                   | 0.17 (0.12)ab            | 0.25 (0.15)                | 0.09 (0.06)              | 0.12 (0.03)                | 0.30 (0.26)           | 0.51 (0.29)                                | 0.49 (0.29)                      | 121.25 (70.18)                              | 14.97 (4.01)                       |
| IR 81958 H | 0.00 (0.00)a                    | 0.00 (0.00)ab            | 0.00 (0.00)                | 0.09 (0.07)              | 0.33 (0.16)                | 0.59 (0.21)           | 0.32 (0.03)                                | 0.68 (0.03)                      | 28.50 (16.78)                               | 12.29 (6.36)                       |
| IR 80228 H | 0.00 (0.00)a                    | 0.02 (0.02)ab            | 0.16 (0.13)                | 0.07 (0.04)              | 0.27 (0.09)                | 0.48 (0.18)           | 0.59 (0.14)                                | 0.41 (0.14)                      | 95.00 (58.81)                               | 12.43 (4.04)                       |
| IR 80637 H | 0.00 (0.00)a                    | 0.03 (0.02)ab            | 0.11 (0.07)                | 0.10 (0.06)              | 0.22 (0.06)                | 0.54 (0.19)           | 0.49 (0.09)                                | 0.54 (0.07)                      | 79.75 (40.53)                               | 18.75 (9.89)                       |
| IR 81949 H | 0.00 (0.00)a                    | 0.01 (0.00)ab            | 0.10 (0.06)                | 0.08 (0.04)              | 0.29 (0.06)                | 0.51 (0.14)           | 0.44 (0.03)                                | 0.56 (0.03)                      | 70.25 (10.16)                               | 13.70 (1.98)                       |
| IR 82363 H | 0.00 (0.00)a                    | 0.00 (0.00)a             | 0.14 (0.10)                | 0.20 (0.10)              | 0.41 (0.07)                | 0.25 (0.10)           | 0.28 (0.15)                                | 0.50 (0.00)                      | 67.67 (59.18)                               | 26.13 (22.66)                      |
| IR 82391 H | 0.00 (0.00)a                    | 0.06 (0.06)ab            | 0.04 (0.04)                | 0.13 (0.10)              | 0.20 (0.12)                | 0.56 (0.26)           | 0.64 (0.13)                                | 0.69 (0.11)                      | 21.50 (10.14)                               | 3.36 (1.05)                        |
| IR 84714 H | 0.00 (0.00)a                    | 0.00 (0.09)a             | 0.09 (0.06)                | 0.08 (0.07)              | 0.24 (0.06)                | 0.59 (0.15)           | 0.37 (0.14)                                | 0.43 (0.17)                      | 41.00 (21.08)                               | 5.81 (3.57)                        |
| IR 85471 H | 0.04 (0.04)ab                   | 0.20 (0.02)ab            | 0.30 (0.09)                | 0.10 (0.04)              | 0.25 (0.08)                | 0.11 (0.03)           | 0.37 (0.19)                                | 0.24 (0.06)a                     | 195.25 (100.51)                             | 41.51 (17.42)                      |
| IR 82385 H | 0.00 (0.00)a                    | 0.03 (0.03)ab            | 0.06 (0.06)                | 0.07 (0.06)              | 0.32 (0.09)                | 0.52 (0.18)           | 0.45 (0.11)                                | 0.49 (0.08)                      | 51.50 (21.56)                               | 14.82 (6.20)                       |
|            | 3.784***                        | 2.594**                  | 1.430ns                    | 0.838ns                  | 0.849ns                    | 1.504ns               | 1.184ns [14,39]                            | 0.967ns [14,39]                  | 1.385ns [14,42]                             | 1.291ns [14,38]                    |

1: Numbers are means (SEM)(N=4); DF = 14,84 unless indicated in square brackets; Wilk’s lambda for development stages = 1.148 and is not significant; ns = P > 0.05, \*\* = P < 0.01, \*\*\* = P < 0.005; lowercase letters indicate homogenous hybrid groups (Tukey: P > 0.05). 2: Blue = heterosis; red = heterobeltiosis for susceptibility

Table S6: Responses by YSB to 15 hybrid rice varieties and their female (A and B lines) and male (restorer lines) parents. The summarized information is presented in Table S7 and Figure 1.

| Accession       | Number of Individuals per Plant <sup>1,2</sup> |             | Development Time (Days) <sup>1,2</sup> |              | Weight of Adult (mg) <sup>1,2</sup> |             | Total Number of<br>Individuals <sup>1,3</sup> | Total Dry Weight<br>(mg) <sup>1,3,4</sup> | Females (Proportion) <sup>1,3</sup> |
|-----------------|------------------------------------------------|-------------|----------------------------------------|--------------|-------------------------------------|-------------|-----------------------------------------------|-------------------------------------------|-------------------------------------|
| Accession       | Female                                         | Male        | Female                                 | Male         | Female                              | Male        |                                               |                                           |                                     |
| IR82396H        | 0.67 (0.33)                                    | 0.67 (0.33) | 37.17 (1.96)                           | 38.33 (3.48) | 9.55 (1.28)                         | 5.42 (0.49) | 1.33 (0.49)                                   | 9.72 (3.68)                               | 0.46 (0.21)                         |
| IR80156A        | 0.50 (0.34)                                    | 0.17 (0.17) | 35.25 (5.25)                           | 30.00        | 7.38 (0.83)                         | 6.10 (0.00) | 0.67 (0.42)                                   | 4.57 (2.89)                               | 0.75 (0.25)                         |
| IR80156B        | 0.50 (0.22)                                    | 0.67 (0.33) | 41.00 (2.08)                           | 47.33 (6.36) | 9.50 (0.72)                         | 3.50 (1.30) | 1.17 (0.40)                                   | 6.72 (2.92)                               | 0.47 (0.23)                         |
| IR46R           | 0.33 (0.21)                                    | 0.50 (0.22) | 40.50 (6.50)                           | 35.00 (3.46) | 11.60 (4.30)                        | 3.90 (0.35) | 0.83 (0.31)                                   | 5.82 (2.56)                               | 0.38 (0.24)                         |
| F-Accession (A) | 0.5959ns                                       |             | 1.982ns [3,12]                         |              | 0.316ns [3,11]                      |             | 0.546ns                                       | 0.523ns                                   | 0.300ns [3,11]                      |
| F-Sex (S)       | 0.001ns                                        |             | 0.060ns                                |              | 18.523***                           |             |                                               |                                           |                                     |
| F-AxS           | 0.357ns                                        |             | 0.810ns                                |              | 1.300ns                             |             |                                               |                                           |                                     |
| IR 82391 H      | 1.33 (0.42)b                                   | 2.00 (0.68) | 35.40 (0.60)                           | 34.98 (2.02) | 9.38 (0.86)                         | 4.12 (0.30) | 3.33 (0.80)b                                  | 20.73 (4.98)b                             | 0.39 (0.11)                         |
| IR 79156 A      | 0.33 (0.21)a                                   | 0.50 (0.34) | 34.50 (0.50)                           | 31.50 (2.50) | 7.75 (1.95)                         | 5.20 (0.20) | 0.83 (0.48)a                                  | 5.15 (3.12)a                              | 0.44 (0.29)                         |
| IR 79156 B      | 0.33 (0.21)a                                   | 0.17 (0.17) | 33.50 (2.50)                           | 39.00        | 4.90 (0.30)                         | 4.20 (0.00) | 0.50 (0.34)a                                  | 2.33 (1.60)a                              | 0.75 (0.25)                         |
| IR60819-34-2    | 0.67 (0.21)ab                                  | 0.83 (0.48) | 41.75 (1.60)                           | 39.67 (5.78) | 10.25 (2.25)                        | 3.91 (0.49) | 1.50 (0.34)ab                                 | 10.13 (1.70)ab                            | 0.58 (0.20)                         |
| Accession       | 5.564***                                       |             | 2.774ns [3,17]                         |              | 0.846ns [3,17]                      |             | 5.787***                                      | 6.539***                                  | 0.495ns [3,13]                      |
| Sex             | 0.604ns                                        |             | 0.001ns                                |              | 12.488***                           |             |                                               |                                           |                                     |
| AxS             | 0.411ns                                        |             | 0.504ns                                |              | 1.351ns                             |             |                                               |                                           |                                     |
| IR 84714 H      | 1.17 (0.48)                                    | 1.17 (0.48) | 37.79 (3.33)                           | 38.54 (1.51) | 8.18 (1.14)                         | 4.60 (0.76) | 2.33 (0.67)                                   | 14.37 (4.44)                              | 0.48 (0.16)                         |
| IR 80559 A      | 0.33 (0.21)                                    | 1.00 (0.37) | 36.50 (2.50)                           | 35.13 (2.44) | 6.25 (3.65)                         | 4.74 (0.52) | 1.33 (0.33)                                   | 6.58 (2.28)                               | 0.30 (0.20)                         |
| IR 80559 B      | 0.33 (0.21)                                    | 0.83 (0.31) | 33.00 (3.00)                           | 37.50 (2.33) | 10.65 (1.75)                        | 3.35 (0.50) | 1.17 (0.31)                                   | 6.45 (2.13)                               | 0.30 (0.20)                         |
| IR60819-34-2 R  | 0.50 (0.34)                                    | 1.00 (0.52) | 41.25 (6.75)                           | 35.83 (1.59) | 8.73 (0.33)                         | 5.07 (0.32) | 1.50 (0.56)                                   | 9.35 (3.47)                               | 0.33 (0.24)                         |
| Accession       | 0.929ns                                        |             | 0.603ns [3,17]                         |              | 0.685ns [3,17]                      |             | 1.111ns                                       | 1.332ns                                   | 0.199ns [3,15]                      |
| Sex             | 2.404ns                                        |             | 0.033ns                                |              | 24.715***                           |             |                                               |                                           |                                     |
| AxS             | 0.288ns                                        |             | 0.860ns                                |              | 2.123ns                             |             |                                               |                                           |                                     |
| IR 85471 H      | 0.83 (0.31)                                    | 0.50 (0.22) | 40.38 (3.51)                           | 35.33 (1.67) | 7.905 (0.45)                        | 4.43 (0.70) | 1.33 (0.49)                                   | 9.17 (3.93)                               | 0.67 (0.12)                         |
| IR 80564 A      | 0.17 (0.17)                                    | 0.50 (0.34) | 41.00                                  | 32.00 (0.00) | 13.10 (0.00)                        | 4.18 (0.63) | 0.67 (0.33)                                   | 4.17 (2.17)                               | 0.33 (0.33)                         |
| IR 80564 B      | 0.50 (0.34)                                    | 2.00 (0.52) | 37.25 (1.25)                           | 35.60 (1.77) | 9.33 (0.52)                         | 4.57 (0.47) | 2.50 (0.72)                                   | 12.83 (4.02)                              | 0.12 (0.08)                         |
| IR60819-34-2 R  | 0.50 (0.34)                                    | 1.00 (0.52) | 41.25 (6.75)                           | 35.83 (1.59) | 8.73 (0.33)                         | 5.07 (0.32) | 1.50 (0.56)                                   | 9.35 (3.47)                               | 0.33 (0.24)                         |
| Accession       | 2.175ns                                        |             | 0.211ns [3,15]                         |              | 2.820ns [3,15]                      |             | 1.931ns                                       | 1.098ns                                   | 1.835ns [3,13]                      |
| Sex             | 3.789ns                                        |             | 5.074*                                 |              | 85.837***                           |             |                                               |                                           |                                     |
| AxS             | 2.175ns                                        |             | 0.368ns                                |              | 3.715*                              |             |                                               |                                           |                                     |

|                    |             |             |                   |              |                |             |               |                |                |
|--------------------|-------------|-------------|-------------------|--------------|----------------|-------------|---------------|----------------|----------------|
| IR 81954 H         | 0.83 (0.40) | 1.17 (0.60) | 40.50 (2.02)      | 37.11 (1.06) | 8.65 (1.16)    | 4.23 (0.11) | 2.00 (0.52)   | 11.80 (2.67)   | 0.53 (0.23)    |
| IR 70369 A         | 0.17 (0.17) | 1.17 (0.40) | 41.00             | 37.63 (4.38) | 20.10 (0.00)   | 4.28 (0.63) | 1.33 (0.49)   | 8.37 (4.87)    | 0.08 (0.08)    |
| IR 70369 B         | 0.17 (0.17) | 0.17 (0.17) | 37.00             | 31.00        | 8.80 (0.00)    | 3.60 (0.00) | 0.33 (0.21)   | 2.07 (1.47)    | 0.50 (0.50)    |
| IR72889-46-3-2-1 R | 0.67 (0.21) | 0.50 (0.22) | 36.50 (0.65)      | 34.67 (5.17) | 8.18 (1.71)    | 4.60 (1.01) | 1.17 (0.40)   | 7.75 (2.99)    | 0.63 (0.13)    |
| Accession          | 2.183ns     |             | 0.637ns [3,12]    |              | 6.623** [3,12] |             | 2.623ns       | 1.468ns        | 1.424ns [3,11] |
| Sex                | 1.581ns     |             | 1.329ns           |              | 41.724***      |             |               |                |                |
| AxS                | 1.237ns     |             | 0.067ns           |              | 6.748**        |             |               |                |                |
| IR 80637 H         | 0.83 (0.31) | 0.67 (0.42) | 37.63 (2.97)      | 36.75 (0.75) | 10.25 (1.60)   | 3.78 (1.13) | 1.50 (0.56)   | 10.90 (4.03)   | 0.70 (0.20)    |
| IR 73328 A         | 0.33 (0.21) | 0.50 (0.22) | 38.50 (4.50)      | 37.00 (0.58) | 9.50 (1.70)    | 2.67 (0.37) | 0.83 (0.40)   | 4.50 (2.54)    | 0.33 (0.17)    |
| IR 73328 B         | 0.17 (0.17) | 1.67 (0.49) | 42.00             | 34.23 (1.63) | 8.20 (0.00)    | 4.66 (0.58) | 1.83 (0.48)   | 8.63 (2.28)    | 0.10 (0.10)    |
| IR73013-95-1-3-2 R | 0.33 (0.21) | 0.33 (0.21) | 39.00 (6.00)      | 33.00 (0.00) | 9.20 (4.40)    | 3.80 (1.00) | 0.67 (0.33)   | 4.33 (2.26)    | 0.50 (0.29)    |
| Accession          | 1.667ns     |             | 0.158ns [3,13]    |              | 0.114ns [3,13] |             | 1.485ns       | 1.150ns        | 2.263ns [3,12] |
| Sex                | 3.092ns     |             | 3.263ns           |              | 19.459***      |             |               |                |                |
| AxS                | 3.193ns     |             | 0.559ns           |              | 0.311ns        |             |               |                |                |
| IR 82385 H         | 0.17 (0.17) | 1.50 (0.56) | 40.00ab           | 36.30 (2.06) | 7.80 (0.00)    | 3.34 (0.56) | 1.67 (0.61)   | 6.77 (3.08)    | 0.07 (0.07)    |
| IR 79125 A         | 0.67 (0.33) | 0.50 (0.34) | 34.00 (2.00)a     | 29.75 (1.25) | 9.27 (0.79)    | 3.33 (0.98) | 1.17 (0.31)   | 7.93 (3.02)    | 0.60 (0.24)    |
| IR 79125 B         | 0.33 (0.21) | 0.17 (0.17) | 43.50 (6.50)b     | 39.00        | 8.40 (3.00)    | 3.30 (0.00) | 0.50 (0.22)   | 3.35 (1.85)    | 0.67 (0.33)    |
| IR73717-46-1-3-3 R | 0.50 (0.22) | 0.67 (0.21) | 37.67<br>(2.73)ab | 41.25 (1.70) | 9.47 (3.11)    | 4.55 (1.41) | 1.17 (0.31)   | 7.77 (3.55)    | 0.40 (0.19)    |
| Accession          | 1.241ns     |             | 3.408* [3,13]     |              | 0.220ns [3,13] |             | 1.486ns       | 0.586ns        | 1.701ns [3,14] |
| Sex                | 1.842ns     |             | 0.990ns           |              | 11.442***      |             |               |                |                |
| AxS                | 2.744ns     |             | 0.987ns           |              | 0.046ns        |             |               |                |                |
| IR 82363 H         | 0.83 (0.31) | 1.17 (0.48) | 39.38 (1.14)b     | 34.92 (2.02) | 10.43 (1.74)   | 3.49 (0.49) | 2.00 (0.52)b  | 12.65 (3.73)ab | 0.50 (0.18)    |
| IR 68897 A         | 0.33 (0.21) | 1.50 (0.34) | 32.50<br>(1.50)ab | 35.60 (0.78) | 7.25 (3.25)    | 3.93 (0.66) | 1.83 (0.31)ab | 7.92 (0.72)ab  | 0.22 (0.16)    |
| IR 68897 B         | 0.00 (0.00) | 0.50 (0.22) | 31.00a            | 31.67 (1.20) | 10.50 (0.00)   | 4.30 (0.55) | 0.50 (0.22)a  | 2.15 (0.99)a   | 0.00 (0.00)    |
| SRT 3 R            | 1.17 (0.48) | 1.00 (0.26) | 37.17<br>(1.42)ab | 34.00 (1.52) | 11.39 (2.02)   | 5.03 (0.94) | 2.17 (0.31)b  | 18.49 (4.62)b  | 0.44 (0.16)    |
| Accession          | 2.808ns     |             | 3.496* [3,20]     |              | 1.171ns [3,20] |             | 4.597*        | 5.443**        | 1.427ns [3,17] |
| Sex                | 4.060ns     |             | 0.623ns           |              | 25.387***      |             |               |                |                |
| AxS                | 1.465ns     |             | 2.377ns           |              | 0.602ns        |             |               |                |                |
| IR 80814 H         | 0.67 (0.49) | 0.83 (0.48) | 37.17 (2.17)      | 37.67 (1.20) | 10.55 (2.55)   | 3.88 (0.84) | 1.50 (0.67)   | 9.43 (4.82)    | 0.31 (0.24)    |
| IR 70369 A         | 0.17 (0.17) | 1.17 (0.40) | 41.00             | 37.63 (4.38) | 20.10 (0.00)   | 4.28 (0.63) | 1.33 (0.49)   | 8.37 (4.87)    | 0.08 (0.08)    |
| IR 70369 B         | 0.17 (0.17) | 0.17 (0.17) | 37.00             | 31.00        | 8.80 (0.00)    | 3.60 (0.00) | 0.33 (0.21)   | 2.07 (1.47)    | 0.50 (0.50)    |

|                       |             |             |               |              |               |             |             |              |                |
|-----------------------|-------------|-------------|---------------|--------------|---------------|-------------|-------------|--------------|----------------|
| IR69712-154-2-3-1-3 R | 0.67 (0.33) | 0.50 (0.34) | 33.00 (0.58)  | 35.25 (3.25) | 9.23 (1.19)   | 4.18 (0.48) | 1.17 (0.65) | 8.35 (4.52)  | 0.67 (0.17)    |
| Accession             | 1.137ns     |             | 0.754ns [3,9] |              | 7.228** [3,9] |             | 0.921ns     | 0.634ns      | 1.342ns [      |
| Sex                   | 1.059ns     |             | 0.295ns       |              | 63.892***     |             |             |              |                |
| AxS                   | 1.137ns     |             | 0.352ns       |              | 6.360*        |             |             |              |                |
| IR 81955 H            | 0.33 (0.21) | 0.33 (0.21) | 37.50 (1.50)  | 41.50 (6.50) | 12.15 (0.25)  | 1.95 (0.05) | 0.67 (0.21) | 4.70 (2.38)  | 0.50 (0.29)    |
| IR 70369 A            | 0.17 (0.17) | 1.17 (0.40) | 41.00         | 37.63 (4.38) | 20.10 (0.00)  | 4.28 (0.63) | 1.33 (0.49) | 8.37 (4.87)  | 0.08 (0.08)    |
| IR 70369 B            | 0.17 (0.17) | 0.17 (0.17) | 37.00         | 31.00 ()     | 8.80 (0.00)   | 3.60 (0.00) | 0.33 (0.21) | 2.07 (1.47)  | 0.50 (0.50)    |
| IR72998-93-3-3-2 R    | 0.67 (0.33) | 1.00 (0.52) | 36.00 (2.08)  | 37.11 (1.46) | 12.40 (0.84)  | 4.58 (1.32) | 1.67 (0.56) | 13.15 (5.44) | 0.45 (0.23)    |
| Accession             | 2.083ns     |             | 0.471ns [3,9] |              | 9.677ns [3,9] |             | 2.299ns     | 1.484ns      | 0.644ns [3,11] |
| Sex                   | 2.500ns     |             | 0.093ns       |              | 143.471***    |             |             |              |                |
| AxS                   | 1.250ns     |             | 0.376ns       |              | 7.010**       |             |             |              |                |
| IR 81956 H            | 0.83 (0.31) | 0.17 (0.17) | 40.63 (1.82)  | 44.00 ()     | 9.41 (1.50)   | 3.60 (0.00) | 1.00 (0.26) | 8.22 (2.47)  | 0.80 (0.20)    |
| IR 70369 A            | 0.17 (0.17) | 1.17 (0.40) | 41.00         | 37.63 (4.38) | 20.10 (0.00)  | 4.28 (0.63) | 1.33 (0.49) | 8.37 (4.87)  | 0.08 (0.08)    |
| IR 70369 B            | 0.17 (0.17) | 0.17 (0.17) | 37.00         | 31.00        | 8.80 (0.00)   | 3.60 (0.00) | 0.33 (0.21) | 2.07 (1.47)  | 0.50 (0.50)    |
| IR73003-73-2-3-2 R    | 0.17 (0.17) | 0.67 (0.33) | 34.00         | 32.33 (0.33) | 7.20 (0.00)   | 2.48 (0.68) | 0.83 (0.31) | 3.08 (1.42)  | 0.25 (0.25)    |
| Accession             | 1.374ns     |             | 1.627ns [3,8] |              | 7.649** [3,8] |             | 1.543ns     | 1.286ns      | 2.241ns [3,11] |
| Sex                   | 1.374ns     |             | 0.297ns       |              | 39.789***     |             |             |              |                |
| AxS                   | 4.011*      |             | 0.315ns       |              | 5.010*        |             |             |              |                |
| IR 81958 H            | 0.33 (0.21) | 0.67 (0.33) | 37.00 (4.00)  | 33.00 (0.58) | 8.00 (3.20)   | 4.13 (1.04) | 1.00 (0.52) | 5.65 (3.52)  | 0.28 (0.15)    |
| IR 70369 A            | 0.17 (0.17) | 1.17 (0.40) | 41.00         | 37.63 (4.38) | 20.10 (0.00)  | 4.28 (0.63) | 1.33 (0.49) | 8.37 (4.87)  | 0.08 (0.08)    |
| IR 70369 B            | 0.17 (0.17) | 0.17 (0.17) | 37.00         | 31.00        | 8.80 (0.00)   | 3.60 (0.00) | 0.33 (0.21) | 2.07 (1.47)  | 0.50 (0.50)    |
| IR73013-95-1-3-2 R    | 0.33 (0.21) | 0.33 (0.21) | 39.00 (6.00)  | 33.00 (0.00) | 9.20 (4.40)   | 3.80 (1.00) | 0.67 (0.33) | 4.33 (2.26)  | 0.50 (0.29)    |
| Accession             | 1.515ns     |             | 0.378ns [3,8] |              | 3.240ns [3,8] |             | 1.111ns     | 0.626ns      | 0.855ns [3,8]  |
| Sex                   | 3.636ns     |             | 1.755ns       |              | 19.961***     |             |             |              |                |
| AxS                   | 1.818ns     |             | 0.036ns       |              | 2.870ns       |             |             |              |                |
| IR 80228 H            | 0.17 (0.17) | 1.00 (0.45) | 46.00         | 35.75 (1.75) | 5.60 (0.00)   | 4.59 (1.12) | 1.17 (0.40) | 5.35 (1.75)  | 0.20 (0.20)    |
| IR 70369 A            | 0.17 (0.17) | 1.17 (0.40) | 41.00         | 37.63 (4.38) | 20.10 (0.00)  | 4.28 (0.63) | 1.33 (0.49) | 8.37 (4.87)  | 0.08 (0.08)    |
| IR 70369 B            | 0.17 (0.17) | 0.17 (0.17) | 37.00         | 31.00        | 8.80 (0.00)   | 3.60 (0.00) | 0.33 (0.21) | 2.07 (1.47)  | 0.50 (0.50)    |
| IR73885-1-4-3-2-1-6 R | 0.33 (0.21) | 0.17 (0.17) | 36.50 (2.50)  | 33.00        | 7.05 (2.15)   | 4.20 (0.00) | 0.50 (0.22) | 3.05 (1.53)  | 0.67 (0.33)    |
| Accession             | 1.769ns     |             | 0.760ns [3,7] |              | 8.248* [3,7]  |             | 1.926ns     | 1.006ns      | 1.171ns [3,10] |
| Sex                   | 5.102*      |             | 2.229ns       |              | 25.000***     |             |             |              |                |
| AxS                   | 2.517ns     |             | 0.201ns       |              | 8.339**       |             |             |              |                |

|                    |             |             |                |              |                |             |             |             |                |
|--------------------|-------------|-------------|----------------|--------------|----------------|-------------|-------------|-------------|----------------|
| IR 81949 H         | 0.33 (0.21) | 1.17 (0.75) | 41.50 (6.50)   | 35.25 (0.75) | 10.25 (3.05)   | 4.80 (0.00) | 1.50 (0.85) | 9.02 (5.25) | 0.40 (0.31)    |
| IR 68897 A         | 0.33 (0.21) | 1.50 (0.34) | 32.50 (1.50)   | 35.60 (0.78) | 7.25 (3.25)    | 3.93 (0.66) | 1.83 (0.31) | 7.92 (0.72) | 0.22 (0.16)    |
| IR 68897 B         | 0.00 (0.00) | 0.50 (0.22) | 31.00          | 31.67 (1.20) | 10.50 (0.00)   | 4.30 (0.55) | 0.50 (0.22) | 2.15 (0.99) | 0.00 (0.00)    |
| IR73013-95-1-3-2 R | 0.33 (0.21) | 0.33 (0.21) | 39.00 (6.00)   | 33.00 (0.00) | 9.20 (4.40)    | 3.80 (1.00) | 0.67 (0.33) | 4.33 (2.26) | 0.50 (0.29)    |
| Accession          | 1.830ns     |             | 1.903ns [3,11] |              | 0.446ns [3,11] |             | 1.705ns     | 1.209ns     | 0.864ns [3,11] |
| Sex                | 6.02*       |             | 1.073ns        |              | 12.426***      |             |             |             |                |
| AxS                | 1.094ns     |             | 1.529ns        |              | 0.222ns        |             |             |             |                |
| IR 86167 H         | 0.83 (0.54) | 0.67 (0.33) | 21.17 (14.84)  | 36.33 (1.20) | 7.20 (0.70)    | 5.03 (1.13) | 1.50 (0.67) | 9.27 (4.24) | 0.38 (0.24)    |
| IR80156A           | 0.50 (0.34) | 0.17 (0.17) | 35.25 (5.25)   | 30.00        | 7.38 (0.83)    | 6.10 (0.00) | 0.67 (0.42) | 4.57 (2.89) | 0.75 (0.25)    |
| IR80156B           | 0.50 (0.22) | 0.67 (0.33) | 41.00 (2.08)   | 47.33 (6.36) | 9.50 (0.72)    | 3.50 (1.30) | 1.17 (0.40) | 6.72 (2.92) | 0.47 (0.23)    |
| IR73013-95-1-3-2 R | 0.33 (0.21) | 0.33 (0.21) | 39.00 (6.00)   | 33.00 (0.00) | 9.20 (4.40)    | 3.80 (1.00) | 0.67 (0.33) | 4.33 (2.26) | 0.50 (0.29)    |
| Accession          | 0.833ns     |             | 2.689ns [3,10] |              | 0.041ns [3,9]  |             | 0.273ns     | 0.512ns     | 0.273ns        |
| Sex                | 0.139ns     |             | 0.311ns        |              | 8.345*         |             |             |             |                |
| AxS                | 0.231ns     |             | 1.242ns        |              | 0.820ns        |             |             |             |                |

1: Numbers are means (SEM)(N=6); ns = P > 0.05, \* = P < 0.05, \*\* = P < 0.01, \*\*\* = P < 0.005; lowercase letters indicate homogenous line groups (Tukey: P > 0.05). 2: DF = 3,40 for accession and interaction between accession and sex, 1,40 for sex, unless indicated in square brackets; 3: DF = 3,20 for accession unless indicated in square brackets; 4: Note that some of the results for YSB biomass have been summarized by plant-type and presented in a related paper by Horgan et al (2016); the data and information by accession has not been previously published.

Table S7: Responses by YSB to 15 hybrid rice varieties indicating potential sources of resistance/susceptibility based on heterosis or heterobeltiosis with parental lines. Information related to parental lines is presented in Table S6.

| Accession       | Number of Individuals per Plant <sup>1,2,4</sup> |             | Development Time (Days) <sup>1,2,4</sup> |              | Adult Weight (mg) <sup>1,2</sup> |             | Total number of Individuals <sup>1,3</sup> | Total Dry Weight (mg) <sup>1,3,4</sup> | Females (Proportion) <sup>1,3</sup> |
|-----------------|--------------------------------------------------|-------------|------------------------------------------|--------------|----------------------------------|-------------|--------------------------------------------|----------------------------------------|-------------------------------------|
|                 | Female                                           | Male        | Female                                   | Male         | Female                           | Male        |                                            |                                        |                                     |
| IR82396H        | 0.67 (0.33)                                      | 0.67 (0.33) | 37.17 (1.96)                             | 38.33 (3.48) | 9.55 (1.28)                      | 5.42 (0.49) | 1.33 (0.49)                                | 9.72 (3.68)                            | 0.46 (0.21)                         |
| IR 86167 H      | 0.83 (0.54)                                      | 0.67 (0.33) | 21.17 (14.84)                            | 36.33 (1.20) | 7.20 (0.70)                      | 5.03 (1.13) | 1.50 (0.67)                                | 9.27 (4.24)                            | 0.38 (0.24)                         |
| IR 81954 H      | 0.83 (0.40)                                      | 1.17 (0.60) | 40.50 (2.02)                             | 37.11 (1.06) | 8.65 (1.16)                      | 4.23 (0.11) | 2.00 (0.52)                                | 11.80 (2.67)                           | 0.53 (0.23)                         |
| IR 80814 H      | 0.67 (0.49)                                      | 0.83 (0.48) | 37.17 (2.17)                             | 37.67 (1.20) | 10.55 (2.55)                     | 3.88 (0.84) | 1.50 (0.67)                                | 9.43 (4.82)                            | 0.31 (0.24)                         |
| IR 81955 H      | 0.33 (0.21)                                      | 0.33 (0.21) | 37.50 (1.50)                             | 41.50 (6.50) | 12.15 (0.25)                     | 1.95 (0.05) | 0.67 (0.21)                                | 4.70 (2.38)                            | 0.50 (0.29)                         |
| IR 81956 H      | 0.83 (0.31)                                      | 0.17 (0.17) | 40.63 (1.82)                             | 44.00 ()     | 9.41 (1.50)                      | 3.60 (0.00) | 1.00 (0.26)                                | 8.22 (2.47)                            | 0.80 (0.20)                         |
| IR 81958 H      | 0.33 (0.21)                                      | 0.67 (0.33) | 37.00 (4.00)                             | 33.00 (0.58) | 8.00 (3.20)                      | 4.13 (1.04) | 1.00 (0.52)                                | 5.65 (3.52)                            | 0.28 (0.15)                         |
| IR 80228 H      | 0.17 (0.17)                                      | 1.00 (0.45) | 46.00                                    | 35.75 (1.75) | 5.60 (0.00)                      | 4.59 (1.12) | 1.17 (0.40)                                | 5.35 (1.75)                            | 0.20 (0.20)                         |
| IR 80637 H      | 0.83 (0.31)                                      | 0.67 (0.42) | 37.63 (2.97)                             | 36.75 (0.75) | 10.25 (1.60)                     | 3.78 (1.13) | 1.50 (0.56)                                | 10.90 (4.03)                           | 0.70 (0.20)                         |
| IR 81949 H      | 0.33 (0.21)                                      | 1.17 (0.75) | 41.50 (6.50)                             | 35.25 (0.75) | 10.25 (3.05)                     | 4.80 (0.00) | 1.50 (0.85)                                | 9.02 (5.25)                            | 0.40 (0.31)                         |
| IR 82363 H      | 0.83 (0.31)                                      | 1.17 (0.48) | 39.38 (1.14)                             | 34.92 (2.02) | 10.43 (1.74)                     | 3.49 (0.49) | 2.00 (0.52)                                | 12.65 (3.73)                           | 0.50 (0.18)                         |
| IR 82391 H      | 1.33 (0.42)                                      | 2.00 (0.68) | 35.40 (0.60)                             | 34.98 (2.02) | 9.38 (0.86)                      | 4.12 (0.30) | 3.33 (0.80)                                | 20.73 (4.98)                           | 0.39 (0.11)                         |
| IR 84714 H      | 1.17 (0.48)                                      | 1.17 (0.48) | 37.79 (3.33)                             | 38.54 (1.51) | 8.18 (1.14)                      | 4.60 (0.76) | 2.33 (0.67)                                | 14.37 (4.44)                           | 0.48 (0.16)                         |
| IR 85471 H      | 0.83 (0.31)                                      | 0.50 (0.22) | 40.38 (3.51)                             | 35.33 (1.67) | 7.905 (0.45)                     | 4.43 (0.70) | 1.33 (0.49)                                | 9.17 (3.93)                            | 0.67 (0.12)                         |
| IR 82385 H      | 0.17 (0.17)                                      | 1.50 (0.56) | 40.00                                    | 36.30 (2.06) | 7.80 (0.00)                      | 3.34 (0.56) | 1.67 (0.61)                                | 6.77 (3.08)                            | 0.07 (0.07)                         |
| F-Accession (A) | 1.247ns                                          |             | 1.630ns [14,81]                          |              | 0.456ns [14,61]                  |             | 1.258ns                                    | 1.120ns                                | 1.015ns [14,53]                     |
| F-Sex (S)       | 2.447ns                                          |             | 0.565ns [1,81]                           |              | 103.170*** [1,61]                |             |                                            |                                        |                                     |
| F-AxS           | 0.806ns                                          |             | 1.491ns [14,81]                          |              | 1.244ns [14,61]                  |             |                                            |                                        |                                     |

1: Numbers are means (SEM)(N=6); ns = P > 0.05, \*\*\* = P < 0.005; 2: DF = 14,150 for accession and interaction between accession and sex, 1,150 for sex, unless indicated in square brackets; 3: DF = 14,75 for accession unless indicated in square brackets; 4: Blue = heterosis



Table S8: Oviposition by YSB in choice experiments with hybrids and associated parental lines.

| Variety        | Egg masses (per plant) <sup>1</sup> | Eggs (per plant) <sup>1</sup> | Plant biomass (dry mg) <sup>2</sup> | Tiller number (per plant) <sup>2</sup> |
|----------------|-------------------------------------|-------------------------------|-------------------------------------|----------------------------------------|
| IR82396 H      | 1.66 (0.21)                         | 120.00 (21.61)                | 0.42 (0.02)                         | 1.50 (0.34)                            |
| IR80156 A      | 3.00 (0.86)                         | 160.66 (54.46)                | 0.57 (0.17)                         | 1.83 (0.48)                            |
| IR80156 B      | 2.16 (0.40)                         | 102.50 (29.44)                | 0.41 (0.05)                         | 1.33 (0.21)                            |
| IR46R          | 2.00 (0.52)                         | 102.83 (33.39)                | 0.31 (0.02)                         | 1.00 (0.00)                            |
| F-line         | 0.426ns                             | 0.080ns                       | 1.246ns                             | 1.238ns                                |
| F-biomass      | 0.669ns                             | 1.108ns                       |                                     |                                        |
| F-tillers      | 0.188ns                             | 0.360ns                       |                                     |                                        |
| IR82391 H      | 1.50 (0.34)                         | 65.00 (10.90)ab               | 0.33 (0.02)ab                       | 1.00 (0.00)                            |
| IR79156 A      | 1.66 (0.33)                         | 109.66 (25.93)b               | 0.30 (0.02)ab                       | 1.00 (0.00)                            |
| IR79156 B      | 0.33 (0.21)                         | 7.66 (5.75)a                  | 0.28 (0.02)a                        | 1.16 (0.16)                            |
| IR60819-34-2 R | 1.83 (0.70)                         | 59.16 (21.01)ab               | 0.38 (0.03)b                        | 1.16 (0.16)                            |
| F-line         | 1.090ns                             | 3.614*                        | 4.220*                              | 0.625ns                                |
| F-biomass      | 0.001ns                             | 1.237ns                       |                                     |                                        |
| F-tillers      | 1.315ns                             | 2.693ns                       |                                     |                                        |
| IR84714 H      | 4.00 (0.63)b                        | 209.83 (49.93)b               | 0.61 (0.14)                         | 2.16 (0.40)                            |
| IR80559 A      | 1.83 (0.75)ab                       | 84.66 (45.36)ab               | 0.60 (0.11)                         | 2.33 (0.21)                            |
| IR80559 B      | 1.50 (0.62)a                        | 45.66 (26.54)a                | 0.59 (0.16)                         | 2.16 (0.40)                            |
| IR60819-34-2 R | 2.33 (0.56)ab                       | 135.66 (32.71)ab              | 0.46 (0.03)                         | 1.33 (0.21)                            |
| F-line         | 4.586**                             | 3.874*                        | 0.373ns                             | 1.982ns                                |
| F-biomass      | 1.668ns                             | 0.476ns                       |                                     |                                        |
| F-tillers      | 4.164*                              | 2.228ns                       |                                     |                                        |
| IR85471 H      | 1.00 (0.36)                         | 55.66 (23.05)                 | 0.35 (0.02)                         | 1.16 (0.16)                            |
| IR80564 A      | 0.50 (0.34)                         | 15.83 (10.15)                 | 0.30 (0.01)                         | 1.16 (0.16)                            |
| IR80564 B      | 2.33 (1.02)                         | 100.83 (53.88)                | 0.44 (0.14)                         | 1.33 (0.33)                            |
| IR60819-34-2 R | 1.50 (0.43)                         | 87.83 (33.98)                 | 0.41 (0.03)                         | 1.50 (0.22)                            |
| F-line         | 0.815ns                             | 0.459ns                       | 0.649ns                             | 0.470ns                                |
| F-biomass      | 11.703***                           | 9.998***                      |                                     |                                        |
| F-tillers      | 1.461ns                             | 0.747ns                       |                                     |                                        |
| IR81954 H      | 1.00 (0.26)                         | 144.50 (70.08)                | 1.59 (0.09)                         | 3.33 (0.21)                            |
| IR70369 A      | 2.33 (0.92)                         | 147.83 (61.35)                | 1.48 (0.11)                         | 3.00 (0.00)                            |
| IR70369 B      | 2.50 (0.67)                         | 137.66 (43.81)                | 1.48 (0.08)                         | 2.66 (0.21)                            |

|                    |             |                |             |             |
|--------------------|-------------|----------------|-------------|-------------|
| IR72889-46-3-2-1 R | 1.83 (0.31) | 102.50 (22.81) | 1.25 (0.07) | 3.33 (0.33) |
| F-line             | 1.358ns     | 0.596ns        | 2.622ns     | 2.037ns     |
| F-biomass          | 0.584ns     | 1.263ns        |             |             |
| F-tillers          | 0.786ns     | 0.264ns        |             |             |
| IR80637 H          | 3.00 (0.63) | 117.50 (34.91) | 1.34 (0.06) | 3.66 (0.33) |
| IR73328 A          | 2.50 (0.92) | 120.66 (38.05) | 1.30 (0.06) | 3.16 (0.31) |
| IR73328 B          | 2.66 (0.56) | 133.50 (38.21) | 1.32 (0.05) | 3.50 (0.22) |
| IR73013-95-1-3-2 R | 2.66 (0.56) | 152.00 (46.55) | 1.24 (0.07) | 4.16 (0.16) |
| F-line             | 0.045ns     | 0.043ns        | 0.472ns     | 2.451ns     |
| F-biomass          | 0.196ns     | 0.371ns        |             |             |
| F-tillers          | 0.193ns     | 0.119ns        |             |             |
| IR82385 H          | 2.00 (0.58) | 105.83 (33.77) | 1.08 (0.18) | 3.00 (0.25) |
| IR79125 A          | 2.00 (0.58) | 92.33 (27.86)  | 1.48 (0.10) | 3.33 (0.21) |
| IR79125 B          | 2.66 (0.67) | 112.33 (30.51) | 1.38 (0.12) | 3.50 (0.22) |
| IR73717-46-1-3-3 R | 2.83 (0.94) | 100.50 (29.07) | 1.03 (0.11) | 2.66 (0.21) |
| F-line             | 0.884ns     | 0.667ns        | 2.785ns     | 2.658ns     |
| F-biomass          | 1.442ns     | 0.116ns        |             |             |
| F-tillers          | 0.032ns     | 0.523ns        |             |             |
| IR 82363 H         | 2.33 (0.61) | 95.66 (33.80)  | 1.12 (0.05) | 3.00 (0.26) |
| IR68897 A          | 1.50 (0.85) | 66.50 (33.53)  | 1.06 (0.08) | 2.66 (0.21) |
| IR68897 B          | 1.66 (0.56) | 85.66 (27.96)  | 1.10 (0.05) | 2.66 (0.21) |
| SRT 3 R            | 1.66 (0.49) | 83.83 (31.83)  | 1.09 (0.05) | 2.50 (0.22) |
| F-line             | 0.723ns     | 0.402ns        | 0.258ns     | 0.856ns     |
| F-biomass          | 0.242ns     | 0.026ns        |             |             |
| F-tillers          | 0.048ns     | 0.019ns        |             |             |

1: Numbers are means (SEM) (N = 6); ns = P > 0.05, \* = P < 0.05, \*\* = P < 0.01, \*\*\* = P < 0.001; lowercase numbers indicate homogenous variety groups (Tukey P > 0.05); 2: Degrees of freedom for masses and eggs = 3,18 for accessions/lines, 1,18 for covariates; lowercase numbers indicate homogenous variety groups (Tukey P > 0.05); 3: Degrees of freedom for plant biomass and tiller number = 3,20;

Table S9: Plant growth parameters in field plots at IRRI. Results are summarized in Table S10 and Figure 2.

| Accession        | Sampling Time (DAT) | Plant Height (cm) <sup>1</sup> | Total Tiller Number <sup>1,2</sup> | Leaf Dry Weigh (g) <sup>1</sup> | Stem Dry Weight (g) <sup>1</sup> | Total Plant Dry Weight (g) <sup>1,2</sup> | SPAD-value <sup>1</sup> |
|------------------|---------------------|--------------------------------|------------------------------------|---------------------------------|----------------------------------|-------------------------------------------|-------------------------|
| IR82396H         | 28                  | 49.40 (1.24)                   | 16.00 (0.73)                       | 1.24 (0.09)                     | 2.01 (0.14)                      | 3.25 (0.22)                               | 39.04 (0.47)            |
| IR80156A         | 28                  | 44.30 (0.98)                   | 11.80 (0.94)                       | 0.66 (0.05)                     | 1.25 (0.14)                      | 1.90 (0.19)                               | 36.46 (0.39)            |
| IR80156B         | 28                  | 46.50 (0.72)                   | 11.20 (0.83)                       | 0.59 (0.05)                     | 0.95 (0.10)                      | 1.54 (0.14)                               | 37.22 (0.26)            |
| IR46R            | 28                  | 46.60 (0.81)                   | 15.80 (1.18)                       | 0.18 (0.08)                     | 1.73 (0.13)                      | 2.91 (0.21)                               | 40.28 (0.48)            |
| IR82396H         | 42                  | 72.80 (1.63)                   | 46.00 (2.85)                       | 1.06 (0.42)                     | 6.95 (0.39)                      | 14.02 (0.80)                              | 38.94 (0.42)            |
| IR80156A         | 42                  | 67.30 (1.40)                   | 43.40 (1.78)                       | 1.85 (0.25)                     | 6.77 (0.30)                      | 12.62 (0.52)                              | 36.76 (0.40)            |
| IR80156B         | 42                  | 64.60 (1.48)                   | 41.20 (1.61)                       | 1.85 (0.31)                     | 5.12 (0.29)                      | 9.97 (0.60)                               | 36.92 (0.35)            |
| IR46R            | 42                  | 62.80 (1.32)                   | 41.20 (2.17)                       | 1.57 (0.32)                     | 6.64 (0.50)                      | 12.21 (0.77)                              | 40.20 (0.39)            |
| IR82396H         | 56                  | 88.90 (1.18)                   | 28.40 (1.54)                       | 1.02 (0.73)                     | 17.86 (0.86)                     | 30.89 (1.58)                              | 36.44 (0.62)            |
| IR80156A         | 56                  | 77.12 (1.49)                   | 27.40 (1.51)                       | 1.87 (0.44)                     | 13.15 (0.72)                     | 22.02 (1.13)                              | 33.80 (0.34)            |
| IR80156B         | 56                  | 77.18 (1.52)                   | 33.60 (1.87)                       | 1.01 (0.66)                     | 14.43 (1.14)                     | 24.45 (1.78)                              | 34.94 (0.21)            |
| IR46R            | 56                  | 83.58 (1.02)                   | 30.60 (2.16)                       | 1.46 (0.58)                     | 16.62 (0.67)                     | 30.08 (1.21)                              | 37.78 (0.33)            |
| IR82396H         | 70                  | 102.20 (1.35)                  | 44.40 (1.74)                       | 1.04 (0.30)                     | 33.80 (0.74)                     | 52.84 (1.00)                              | 42.12 (0.31)            |
| IR80156A         | 70                  | 97.50 (2.55)                   | 48.00 (2.15)                       | 2.43 (0.91)                     | 31.91 (1.63)                     | 46.33 (2.45)                              | 40.50 (0.34)            |
| IR80156B         | 70                  | 96.40 (1.45)                   | 40.20 (2.06)                       | 1.41 (0.59)                     | 24.37 (1.35)                     | 36.78 (1.90)                              | 39.60 (0.20)            |
| IR46R            | 70                  | 96.75 (1.84)                   | 47.00 (0.96)                       | 1.09 (1.26)                     | 34.22 (1.12)                     | 58.31 (2.35)                              | 40.26 (0.54)            |
| IR82396H         | 84                  | 114.16 (1.12)                  | 26.20 (1.37)                       | 1.88 (0.42)                     | 22.90 (0.64)                     | 36.78 (0.91)                              | 42.15 (0.55)            |
| IR80156A         | 84                  | 97.92 (1.91)                   | 35.20 (2.77)                       | 1.58 (0.51)                     | 29.01 (0.88)                     | 43.58 (1.18)                              | 41.22 (0.21)            |
| IR80156B         | 84                  | 100.30 (2.28)                  | 25.00 (1.39)                       | 2.84 (0.58)                     | 17.57 (0.81)                     | 27.41 (1.34)                              | 40.46 (0.45)            |
| IR46R            | 84                  | 113.50 (0.85)                  | 27.60 (1.85)                       | 0.16 (0.99)                     | 24.68 (0.94)                     | 40.83 (1.86)                              | 42.74 (0.18)            |
| IR82396H         | 98                  | 114.22 (0.98)                  | 31.80 (1.80)                       | 0.67 (1.55)                     | 27.18 (2.37)                     | 42.85 (3.90)B                             | 38.22 (0.56)            |
| IR80156A         | 112                 | 92.68 (0.64)                   | 64.10 (1.10)                       | 0.24 (0.54)                     | 36.55 (0.72)                     | 53.78 (1.20)AB                            | 38.82 (0.16)            |
| IR80156B         | 93                  | 103.69 (1.49)                  | 28.80 (1.80)                       | 1.18 (0.63)                     | 18.27 (0.91)                     | 28.44 (1.54)A                             | 37.90 (0.50)            |
| IR46R            | 112                 | 113.75 (0.93)                  | 29.50 (1.50)                       | 0.12 (1.03)                     | 36.49 (2.10)                     | 55.61 (3.12)AB                            | 38.28 (0.80)            |
| Time             |                     |                                | 45.323***                          |                                 |                                  | 175.215***                                | 2.844*                  |
| Time x Accession |                     |                                | 4.479***                           |                                 |                                  | 1.444ns                                   | 1.070ns                 |
| Within contrasts |                     |                                | 161.804***Q                        |                                 |                                  | 7.6357***                                 |                         |
| Accession        |                     |                                | 2.715ns                            |                                 |                                  | 4.880*                                    | 1.417ns                 |
| IR 82391 H       | 28                  | 46.60 (1.32)                   | 15.60 (1.35)                       | 1.02 (0.10)                     | 1.78 (0.21)                      | 2.80 (0.31)                               | 38.24 (0.38)            |
| IR 79156 A       | 28                  | 44.40 (0.88)                   | 22.00 (1.63)                       | 0.02 (0.09)                     | 2.17 (0.18)                      | 3.19 (0.27)                               | 38.60 (0.21)            |

|                  |    |               |                |             |              |              |                |
|------------------|----|---------------|----------------|-------------|--------------|--------------|----------------|
| IR 79156 B       | 28 | 43.50 (1.05)  | 14.00 (0.73)   | 1.68 (0.08) | 1.13 (0.10)  | 1.82 (0.18)  | 39.02 (0.25)   |
| IR60819-34-2     | 28 | 46.60 (0.86)  | 13.00 (1.22)   | 0.79 (0.05) | 1.50 (0.14)  | 2.30 (0.18)  | 41.34 (0.52)   |
| IR 82391 H       | 42 | 72.20 (0.72)  | 44.60 (1.80)   | 0.52 (0.27) | 7.68 (0.46)  | 14.20 (0.68) | 39.62 (0.48)   |
| IR 79156 A       | 42 | 62.00 (2.11)  | 54.40 (1.82)   | 2.05 (0.29) | 6.25 (0.46)  | 12.30 (0.75) | 38.28 (0.62)   |
| IR 79156 B       | 42 | 64.70 (0.93)  | 40.40 (1.65)   | 0.76 (0.23) | 5.34 (0.30)  | 10.10 (0.49) | 36.88 (0.47)   |
| IR60819-34-2     | 42 | 72.50 (1.07)  | 35.40 (0.77)   | 1.53 (0.23) | 6.73 (0.50)  | 12.26 (0.72) | 41.26 (0.56)   |
| IR 82391 H       | 56 | 90.44 (0.78)  | 31.00 (1.76)   | 0.09 (0.58) | 16.20 (0.62) | 27.29 (1.05) | 36.92 (0.85)   |
| IR 79156 A       | 56 | 85.05 (1.45)  | 38.60 (1.39)   | 1.07 (0.36) | 15.15 (0.68) | 27.22 (0.99) | 36.30 (0.51)   |
| IR 79156 B       | 56 | 80.80 (1.23)  | 29.80 (2.89)   | 1.55 (0.73) | 12.67 (0.90) | 23.22 (1.62) | 35.92 (0.56)   |
| IR60819-34-2     | 56 | 94.17 (1.23)  | 33.20 (2.16)   | 1.82 (0.62) | 15.82 (0.57) | 28.64 (1.14) | 39.62 (0.33)   |
| IR 82391 H       | 70 | 111.75 (2.49) | 41.60 (1.53)   | 2.58 (0.88) | 34.06 (1.35) | 50.63 (2.21) | 42.88 (0.27)   |
| IR 79156 A       | 70 | 107.20 (1.57) | 47.20 (1.66)   | 1.98 (0.34) | 31.77 (1.21) | 48.75 (1.48) | 39.38 (0.35)   |
| IR 79156 B       | 70 | 110.25 (2.39) | 49.00 (1.98)   | 2.74 (0.61) | 30.18 (1.07) | 47.91 (1.63) | 38.22 (0.41)   |
| IR60819-34-2     | 70 | 98.80 (1.77)  | 38.80 (1.12)   | 1.37 (0.91) | 32.93 (1.28) | 51.30 (2.10) | 42.88 (0.36)   |
| IR 82391 H       | 84 | 107.86 (2.11) | 24.80 (0.91)   | 2.57 (0.61) | 19.03 (0.50) | 30.60 (1.03) | 40.92 (0.36)   |
| IR 79156 A       | 84 | 110.34 (1.80) | 25.20 (1.52)   | 1.00 (0.73) | 24.13 (1.34) | 36.13 (2.01) | 40.20 (0.55)   |
| IR 79156 B       | 84 | 115.26 (0.81) | 21.80 (0.74)   | 0.67 (0.43) | 20.16 (0.77) | 32.84 (1.11) | 39.10 (0.44)   |
| IR60819-34-2     | 84 | 102.76 (0.51) | 20.40 (1.51)   | 0.32 (0.48) | 19.33 (0.42) | 31.65 (0.80) | 46.22 (0.70)   |
| IR 82391 H       | 93 | 112.98 (2.02) | 25.20 (1.80)AB | 2.57 (0.71) | 19.78 (1.30) | 30.36 (1.98) | 39.98 (0.59)B  |
| IR 79156 A       | 98 | 111.99 (1.23) | 33.80 (1.05)B  | 1.66 (0.49) | 25.68 (0.89) | 39.34 (1.29) | 37.46 (0.31)AB |
| IR 79156 B       | 98 | 113.38 (0.82) | 33.70 (2.01)AB | 0.34 (0.57) | 26.60 (0.87) | 41.94 (1.42) | 38.36 (0.57)A  |
| IR60819-34-2     | 93 | 107.34 (0.25) | 24.60 (0.93)A  | 0.89 (0.53) | 24.79 (0.78) | 39.67 (1.15) | 42.46 (0.54)C  |
| Time             |    |               | 44.339***      |             |              | 144.167***   | 7.485***       |
| Time x Accession |    |               | 1.070ns        |             |              | 1.761ns      | 0.879ns        |
| Within contrasts |    |               | 72.730***Q     |             |              | 649.022***L  | 12.873***C     |
| Accession        |    |               | 4.858*         |             |              | 1.905ns      | 27.266***      |
| IR 84714 H       | 28 | 47.70 (0.99)  | 17.80 (1.19)   | 0.04 (0.08) | 1.97 (0.14)  | 3.00 (0.21)  | 40.56 (0.28)   |
| IR 80559 A       | 28 | 46.60 (0.90)  | 14.40 (1.37)   | 0.85 (0.10) | 1.46 (0.21)  | 2.30 (0.31)  | 36.44 (0.27)   |
| IR 80559 B       | 28 | 45.90 (0.94)  | 22.20 (1.28)   | 0.08 (0.08) | 1.96 (0.26)  | 3.03 (0.34)  | 37.12 (0.42)   |
| IR60819-34-2 R   | 28 | 38.20 (0.57)  | 8.00 (0.55)    | 0.36 (0.03) | 0.64 (0.06)  | 1.00 (0.09)  | 38.68 (0.29)   |
| IR 84714 H       | 42 | 74.10 (0.91)  | 42.00 (2.55)   | 0.44 (0.26) | 7.62 (0.32)  | 14.06 (0.56) | 41.78 (0.51)   |
| IR 80559 A       | 42 | 70.80 (0.76)  | 46.60 (1.27)   | 0.56 (0.17) | 7.55 (0.22)  | 14.11 (0.39) | 38.62 (0.27)   |
| IR 80559 B       | 42 | 65.90 (1.03)  | 51.00 (3.21)   | 1.47 (0.50) | 7.41 (0.62)  | 13.87 (1.07) | 38.78 (0.60)   |
| IR60819-34-2 R   | 42 | 64.20 (0.91)  | 31.00 (0.81)   | 0.69 (0.13) | 4.47 (0.33)  | 8.17 (0.45)  | 41.20 (0.37)   |

|                  |     |               |              |             |              |              |                |
|------------------|-----|---------------|--------------|-------------|--------------|--------------|----------------|
| IR 84714 H       | 56  | 85.00 (0.75)  | 28.20 (2.13) | 0.58 (0.44) | 16.39 (0.79) | 26.97 (1.20) | 38.12 (0.51)   |
| IR 80559 A       | 56  | 83.71 (0.96)  | 31.00 (1.05) | 0.66 (0.39) | 14.46 (0.32) | 26.12 (0.69) | 33.92 (0.29)   |
| IR 80559 B       | 56  | 79.75 (0.59)  | 30.80 (1.49) | 0.81 (0.78) | 12.79 (0.96) | 23.60 (1.64) | 35.78 (0.62)   |
| IR60819-34-2 R   | 56  | 86.88 (1.13)  | 28.60 (1.25) | 1.56 (0.66) | 13.61 (0.79) | 25.18 (1.44) | 36.82 (0.38)   |
| IR 84714 H       | 70  | 102.00 (0.51) | 33.60 (1.45) | 0.73 (0.52) | 29.44 (0.91) | 42.17 (1.41) | 44.84 (0.26)   |
| IR 80559 A       | 70  | 104.20 (0.84) | 43.00 (1.19) | 0.69 (0.26) | 29.04 (1.04) | 44.73 (1.23) | 41.04 (0.34)   |
| IR 80559 B       | 70  | 98.75 (3.53)  | 44.80 (1.14) | 3.44 (0.67) | 28.22 (0.76) | 43.66 (1.36) | 41.38 (0.41)   |
| IR60819-34-2 R   | 70  | 102.00 (0.69) | 45.00 (1.61) | 0.16 (0.82) | 34.52 (1.14) | 55.69 (1.93) | 44.32 (0.34)   |
| IR 84714 H       | 84  | 100.96 (1.76) | 20.00 (1.03) | 1.40 (0.40) | 16.21 (0.52) | 25.62 (0.90) | 43.80 (0.38)   |
| IR 80559 A       | 84  | 102.24 (1.39) | 28.60 (1.39) | 1.86 (0.41) | 27.97 (1.31) | 41.83 (1.70) | 40.40 (0.14)   |
| IR 80559 B       | 84  | 106.68 (1.30) | 25.60 (0.76) | 1.72 (0.71) | 18.60 (0.71) | 30.32 (1.39) | 42.58 (1.14)   |
| IR60819-34-2 R   | 84  | 105.42 (1.15) | 21.60 (1.65) | 1.60 (0.11) | 20.76 (0.35) | 33.36 (0.36) | 46.60 (0.32)   |
| IR 84714 H       | 93  | 104.70 (1.01) | 26.60 (0.76) | 1.55 (0.19) | 21.76 (0.59) | 32.31 (0.75) | 42.20 (0.30)B  |
| IR 80559 A       | 112 | 99.62 (0.29)  | 57.70 (2.50) | 0.13 (0.30) | 45.75 (1.87) | 63.88 (2.01) | 37.80 (0.25)AB |
| IR 80559 B       | 93  | 106.22 (0.66) | 32.00 (1.23) | 0.69 (0.54) | 23.07 (1.05) | 35.76 (1.34) | 40.40 (0.31)A  |
| IR60819-34-2 R   | 98  | 107.42 (0.66) | 22.90 (0.96) | 0.63 (0.61) | 25.69 (0.77) | 39.32 (1.32) | 42.32 (0.53)AB |
| Time             |     |               | 40.496***    |             |              | 214.455***   | 6.076***       |
| Time x Accession |     |               | 6.606***     |             |              | 0.835ns      | 1.447ns        |
| Within contrasts |     |               | 57.611***C   |             |              | 1368.818***L | 10.980***L     |
| Accession        |     |               | 2.676ns      |             |              | 1.973ns      | 4.338*         |
| IR 85471 H       | 28  | 54.10 (0.85)  | 17.60 (0.98) | 0.47 (0.11) | 2.23 (0.20)  | 3.70 (0.30)  | 38.32 (0.63)   |
| IR 80564 A       | 28  | 46.00 (1.10)  | 13.00 (0.98) | 1.78 (0.08) | 1.30 (0.13)  | 2.08 (0.20)  | 39.44 (0.50)   |
| IR 80564 B       | 28  | 45.90 (0.97)  | 15.00 (1.32) | 0.94 (0.10) | 1.55 (0.19)  | 2.48 (0.29)  | 40.34 (0.63)   |
| IR60819-34-2 R   | 28  | 38.20 (0.57)  | 8.00 (0.55)  | 0.36 (0.03) | 0.64 (0.06)  | 1.00 (0.09)  | 38.68 (0.29)   |
| IR 85471 H       | 42  | 75.00 (1.21)  | 34.60 (1.90) | 1.49 (0.42) | 7.29 (0.46)  | 13.79 (0.85) | 38.78 (0.37)   |
| IR 80564 A       | 42  | 64.20 (0.67)  | 39.20 (1.18) | 0.17 (0.28) | 6.31 (0.46)  | 11.48 (0.73) | 40.40 (0.43)   |
| IR 80564 B       | 42  | 63.60 (1.18)  | 32.20 (0.68) | 1.69 (0.23) | 5.67 (0.33)  | 10.36 (0.53) | 40.70 (0.17)   |
| IR60819-34-2 R   | 42  | 64.20 (0.91)  | 31.00 (0.81) | 0.69 (0.13) | 4.47 (0.33)  | 8.17 (0.45)  | 41.20 (0.37)   |
| IR 85471 H       | 56  | 91.82 (0.32)  | 28.20 (1.05) | 0.80 (0.31) | 18.00 (0.71) | 30.80 (0.67) | 37.42 (0.39)   |
| IR 80564 A       | 56  | 79.03 (1.28)  | 30.00 (2.87) | 1.46 (0.61) | 13.83 (0.70) | 24.29 (1.27) | 38.50 (0.19)   |
| IR 80564 B       | 56  | 79.03 (0.78)  | 28.20 (1.34) | 0.53 (0.44) | 15.17 (0.45) | 26.69 (0.87) | 37.94 (0.49)   |
| IR60819-34-2 R   | 56  | 86.88 (1.13)  | 28.60 (1.25) | 1.56 (0.66) | 13.61 (0.79) | 25.18 (1.44) | 36.82 (0.38)   |
| IR 85471 H       | 70  | 110.25 (0.43) | 41.40 (1.20) | 0.25 (0.82) | 39.12 (1.37) | 57.37 (2.18) | 41.36 (0.30)   |
| IR 80564 A       | 70  | 97.00 (1.67)  | 33.60 (0.90) | 1.41 (0.41) | 27.98 (0.79) | 41.39 (1.12) | 44.40 (0.27)   |

|                    |     |               |              |             |              |                |                |
|--------------------|-----|---------------|--------------|-------------|--------------|----------------|----------------|
| IR 80564 B         | 70  | 100.20 (1.10) | 39.00 (1.17) | 1.01 (0.63) | 31.08 (1.63) | 46.09 (2.23)   | 43.62 (0.31)   |
| IR60819-34-2 R     | 70  | 102.00 (0.69) | 45.00 (1.61) | 0.16 (0.82) | 34.52 (1.14) | 55.69 (1.93)   | 44.32 (0.34)   |
| IR 85471 H         | 84  | 102.70 (2.03) | 20.60 (0.82) | 2.20 (0.31) | 17.40 (0.34) | 28.60 (0.45)   | 42.04 (0.51)   |
| IR 80564 A         | 84  | 94.64 (1.52)  | 26.00 (1.20) | 1.06 (0.46) | 27.61 (1.12) | 39.67 (1.56)   | 44.38 (0.44)   |
| IR 80564 B         | 84  | 102.22 (1.69) | 24.80 (1.22) | 1.96 (0.50) | 19.35 (0.55) | 31.31 (0.99)   | 45.68 (0.20)   |
| IR60819-34-2 R     | 84  | 105.42 (1.15) | 21.60 (1.65) | 1.60 (0.11) | 20.76 (0.35) | 33.36 (0.36)   | 46.60 (0.32)   |
| IR 85471 H         | 93  | 108.57 (0.68) | 24.20 (1.02) | 0.47 (0.64) | 19.95 (0.58) | 31.43 (1.16)B  | 40.00 (0.31)A  |
| IR 80564 A         | 112 | 95.46 (0.76)  | 65.70 (3.67) | 0.85 (0.58) | 51.44 (1.34) | 70.29 (1.87)A  | 41.00 (0.58)B  |
| IR 80564 B         | 93  | 105.27 (1.19) | 23.40 (1.14) | 1.30 (0.60) | 19.65 (0.70) | 30.95 (1.27)AB | 43.10 (0.35)AB |
| IR60819-34-2 R     | 98  | 107.42 (0.66) | 22.90 (0.96) | 0.63 (0.61) | 25.69 (0.77) | 39.32 (1.32)AB | 42.32 (0.53)AB |
| Time               |     |               | 38.975***    |             |              | 230.799***     | 34.615***      |
| Time x Accession   |     |               | 10.180***    |             |              | 17.40ns        | 1.729ns        |
| Within contrasts   |     |               | 45.473***C   |             |              | 753.489***L    | 63.466***L     |
| Accession          |     |               | 2.525ns      |             |              | 3.596*         | 2.313*         |
| IR 81954 H         | 28  | 57.50 (0.45)  | 18.80 (0.86) | 1.97 (0.12) | 3.09 (0.21)  | 5.05 (0.34)    | 37.64 (0.48)   |
| IR 70369 A         | 28  | 52.80 (0.95)  | 12.60 (0.86) | 0.02 (0.12) | 1.69 (0.21)  | 2.71 (0.34)    | 39.28 (0.48)   |
| IR 70369 B         | 28  | 55.00 (0.61)  | 13.20 (0.70) | 0.27 (0.08) | 2.08 (0.15)  | 3.35 (0.23)    | 38.00 (0.32)   |
| IR72889-46-3-2-1 R | 28  | 47.60 (1.54)  | 12.00 (0.88) | 1.76 (0.13) | 1.08 (0.25)  | 1.85 (0.38)    | 35.44 (0.54)   |
| IR 81954 H         | 42  | 89.20 (0.76)  | 36.00 (0.68) | 0.45 (0.08) | 9.67 (0.10)  | 18.12 (0.18)   | 38.80 (0.14)   |
| IR 70369 A         | 42  | 75.60 (1.45)  | 23.60 (1.48) | 1.13 (0.34) | 6.54 (0.36)  | 11.67 (0.69)   | 38.34 (0.43)   |
| IR 70369 B         | 42  | 74.10 (0.61)  | 23.60 (1.38) | 0.85 (0.32) | 7.55 (0.45)  | 13.40 (0.74)   | 38.00 (0.35)   |
| IR72889-46-3-2-1 R | 42  | 71.10 (0.83)  | 46.60 (1.10) | 0.94 (0.30) | 6.33 (0.37)  | 12.26 (0.60)   | 38.28 (0.25)   |
| IR 81954 H         | 56  | 98.11 (1.09)  | 28.20 (2.18) | 1.57 (0.41) | 22.71 (0.51) | 39.28 (0.91)   | 33.62 (0.27)   |
| IR 70369 A         | 56  | 92.23 (1.87)  | 15.80 (1.87) | 1.01 (0.94) | 14.61 (1.07) | 24.62 (2.01)   | 35.60 (0.66)   |
| IR 70369 B         | 56  | 91.69 (0.62)  | 22.80 (0.74) | 0.20 (0.48) | 15.77 (0.67) | 25.96 (1.11)   | 38.28 (0.76)   |
| IR72889-46-3-2-1 R | 56  | 94.22 (0.45)  | 34.00 (1.28) | 0.67 (0.77) | 15.54 (1.04) | 29.21 (1.80)   | 35.18 (0.15)   |
| IR 81954 H         | 70  | 122.50 (0.52) | 40.80 (2.70) | 0.76 (0.70) | 44.71 (0.82) | 68.47 (1.52)   | 39.62 (0.61)   |
| IR 70369 A         | 70  | 107.25 (1.76) | 32.40 (1.67) | 1.25 (0.83) | 38.80 (1.40) | 54.05 (2.22)   | 41.88 (0.71)   |
| IR 70369 B         | 70  | 111.50 (1.90) | 29.40 (1.59) | 1.28 (1.15) | 37.55 (2.15) | 51.82 (3.18)   | 40.92 (0.24)   |
| IR72889-46-3-2-1 R | 70  | 108.40 (1.74) | 52.20 (1.45) | 1.51 (0.43) | 40.54 (0.70) | 69.05 (1.01)   | 35.72 (0.36)   |
| IR 81954 H         | 84  | 131.28 (1.19) | 17.00 (0.47) | 1.90 (1.73) | 23.25 (2.07) | 37.15 (3.72)   | 42.68 (0.62)   |
| IR 70369 A         | 84  | 105.00 (2.73) | 25.00 (0.75) | 2.49 (0.38) | 28.39 (1.04) | 39.88 (1.38)   | 42.20 (0.48)   |
| IR 70369 B         | 84  | 107.10 (3.33) | 15.40 (0.86) | 3.08 (0.66) | 20.54 (1.74) | 30.62 (2.38)   | 43.75 (0.25)   |
| IR72889-46-3-2-1 R | 84  | 121.82 (2.17) | 20.80 (1.11) | 2.51 (0.42) | 24.79 (1.28) | 41.30 (1.68)   | 38.05 (0.77)   |

|                    |     |               |                |             |              |              |                   |
|--------------------|-----|---------------|----------------|-------------|--------------|--------------|-------------------|
| IR 81954 H         | 98  | 128.70 (3.02) | 19.00 (0.76)AB | 3.76 (0.68) | 27.53 (0.85) | 42.28 (1.43) | 38.50 (0.77)AB    |
| IR 70369 A         | 98  | 109.62 (1.53) | 44.30 (4.19)A  | 1.86 (0.22) | 46.54 (0.89) | 62.40 (0.97) | 42.16 (0.30)B     |
| IR 70369 B         | 91  | 110.27 (1.64) | 22.20 (0.99)A  | 1.10 (1.27) | 30.25 (3.59) | 45.35 (4.76) | 42.40 (0.45)B     |
| IR72889-46-3-2-1 R | 112 | 127.28 (0.52) | 33.00 (2.53)B  | 0.60 (2.27) | 45.32 (3.93) | 69.91 (6.15) | 37.62 (0.56)A     |
| Time               |     |               | 23.581***      |             |              | 113.531***   | 15.977*** [5,65]  |
| Time x Accession   |     |               | 4.650***       |             |              | 72.950ns     | 2.168* [15,65]    |
| Within contrasts   |     |               | 48.040***C     |             |              | 376.432***L  | 33.065***L [1,13] |
| Accession          |     |               | 6.477***       |             |              | 2.072ns      | 8.139*** [3,13]   |
| IR 80637 H         | 28  | 54.70 (1.60)  | 14.60 (1.43)   | 1.47 (0.18) | 1.98 (0.24)  | 3.44 (0.42)  | 38.32 (0.63)      |
| IR 73328 A         | 28  | 44.60 (1.04)  | 10.60 (0.66)   | 1.66 (0.05) | 0.95 (0.07)  | 1.61 (0.12)  | 37.72 (0.35)      |
| IR 73328 B         | 28  | 49.70 (0.66)  | 13.00 (0.81)   | 0.90 (0.06) | 1.40 (0.11)  | 2.30 (0.16)  | 41.22 (0.40)      |
| IR73013-95-1-3-2 R | 28  | 44.70 (0.34)  | 11.00 (0.75)   | 0.64 (0.02) | 0.98 (0.06)  | 1.61 (0.08)  | 38.06 (0.19)      |
| IR 80637 H         | 42  | 85.90 (1.78)  | 34.60 (1.82)   | 1.67 (0.60) | 8.17 (0.73)  | 15.84 (1.32) | 38.86 (0.38)      |
| IR 73328 A         | 42  | 70.90 (0.95)  | 30.80 (0.86)   | 0.70 (0.31) | 5.18 (0.41)  | 9.89 (0.72)  | 39.12 (0.49)      |
| IR 73328 B         | 42  | 74.00 (2.06)  | 33.00 (1.92)   | 2.21 (0.33) | 6.48 (0.49)  | 11.69 (0.81) | 39.64 (0.25)      |
| IR73013-95-1-3-2 R | 42  | 66.70 (1.65)  | 32.00 (1.66)   | 1.05 (0.43) | 4.77 (0.33)  | 9.82 (0.75)  | 38.36 (0.57)      |
| IR 80637 H         | 56  | 98.14 (1.37)  | 22.60 (1.44)   | 1.11 (0.49) | 13.92 (0.74) | 25.03 (1.15) | 35.50 (0.47)      |
| IR 73328 A         | 56  | 91.36 (0.46)  | 32.60 (1.27)   | 0.03 (0.42) | 15.33 (0.43) | 26.37 (0.69) | 38.02 (0.42)      |
| IR 73328 B         | 56  | 90.55 (0.92)  | 26.60 (1.68)   | 0.55 (0.80) | 15.78 (0.92) | 26.33 (1.71) | 38.18 (0.49)      |
| IR73013-95-1-3-2 R | 56  | 82.86 (0.55)  | 31.60 (0.86)   | 0.89 (0.18) | 12.46 (0.58) | 23.35 (0.73) | 34.20 (0.38)      |
| IR 80637 H         | 70  | 114.20 (0.65) | 38.00 (0.97)   | 0.87 (1.34) | 41.58 (1.71) | 63.45 (3.05) | 40.40 (0.33)      |
| IR 73328 A         | 70  | 111.20 (0.48) | 42.80 (2.50)   | 0.67 (0.99) | 42.53 (2.37) | 58.20 (3.28) | 43.06 (0.57)      |
| IR 73328 B         | 70  | 114.75 (1.07) | 33.40 (0.77)   | 1.76 (0.15) | 33.22 (0.54) | 45.98 (0.50) | 40.08 (0.10)      |
| IR73013-95-1-3-2 R | 70  | 93.60 (1.11)  | 49.00 (1.14)   | 1.48 (0.96) | 31.87 (1.03) | 56.35 (1.99) | 39.10 (0.52)      |
| IR 80637 H         | 84  | 121.96 (1.53) | 25.40 (0.32)   | 1.79 (0.69) | 24.32 (1.14) | 39.11 (1.62) | 41.70 (0.47)      |
| IR 73328 A         | 84  | 111.76 (1.23) | 22.20 (0.48)   | 1.20 (0.66) | 24.70 (2.04) | 34.90 (2.60) | 42.80 (0.31)      |
| IR 73328 B         | 84  | 114.40 (1.92) | 22.20 (0.62)   | 1.83 (0.46) | 19.44 (0.62) | 29.27 (1.03) | 40.44 (0.63)      |
| IR73013-95-1-3-2 R | 84  | 112.64 (1.43) | 22.00 (1.44)   | 1.56 (0.44) | 25.52 (0.72) | 41.08 (1.13) | 41.26 (0.43)      |
| IR 80637 H         | 98  | 123.95 (1.92) | 22.80 (0.94)   | 1.62 (1.38) | 32.62 (2.32) | 51.23 (3.64) | 37.46 (0.13)AB    |
| IR 73328 A         | 98  | 117.56 (0.76) | 48.50 (2.90)   | 0.21 (0.68) | 36.05 (1.36) | 49.26 (1.95) | 39.42 (0.47)B     |
| IR 73328 B         | 93  | 113.14 (0.91) | 22.00 (0.80)   | 0.82 (0.28) | 24.29 (1.03) | 34.11 (1.27) | 38.48 (0.55)B     |
| IR73013-95-1-3-2 R | 112 | 117.29 (0.51) | 30.80 (0.66)   | 0.20 (0.75) | 41.26 (2.77) | 62.46 (3.52) | 39.82 (0.55)A     |
| Time               |     |               | 43.695***      |             |              | 185.443***   | 11.739*** [5,75]  |
| Time x Accession   |     |               | 4.920***       |             |              | 3.270***     | 1.305ns [15,75]   |

| Within contrasts   |     |               | 97.294***Q   |             |              | 496.102***L   | 17.096***C [1,15] |
|--------------------|-----|---------------|--------------|-------------|--------------|---------------|-------------------|
| Accession          |     |               | 1.175ns      |             |              | 2.754ns       | 5.389** [3,15]    |
| IR 82385 H         | 28  | 52.60 (0.98)  | 18.20 (1.23) | 0.38 (0.16) | 2.05 (0.18)  | 3.43 (0.33)   | 38.68 (0.36)      |
| IR 79125 A         | 28  | 41.40 (1.06)  | 8.80 (1.16)  | 1.58 (0.10) | 0.79 (0.13)  | 1.37 (0.23)   | 38.48 (0.49)      |
| IR 79125 B         | 28  | 48.60 (1.13)  | 24.60 (2.80) | 1.47 (0.14) | 2.41 (0.24)  | 3.87 (0.38)   | 38.46 (0.37)      |
| IR73717-46-1-3-3 R | 28  | 46.80 (0.82)  | 12.40 (1.20) | 0.89 (0.09) | 1.33 (0.15)  | 2.23 (0.24)   | 37.92 (0.38)      |
| IR 82385 H         | 42  | 71.00 (1.47)  | 38.60 (2.29) | 1.31 (0.57) | 6.66 (0.71)  | 12.97 (1.29)  | 38.56 (0.38)      |
| IR 79125 A         | 42  | 61.90 (1.17)  | 44.00 (1.37) | 1.06 (0.20) | 5.63 (0.33)  | 10.69 (0.51)  | 38.16 (0.52)      |
| IR 79125 B         | 42  | 61.80 (0.67)  | 45.20 (1.13) | 0.39 (0.18) | 5.48 (0.26)  | 10.87 (0.43)  | 38.40 (0.69)      |
| IR73717-46-1-3-3 R | 42  | 67.80 (1.35)  | 34.80 (1.96) | 1.62 (0.36) | 5.69 (0.44)  | 10.31 (0.79)  | 38.26 (0.39)      |
| IR 82385 H         | 56  | 87.52 (0.35)  | 29.80 (1.06) | 0.69 (0.38) | 14.56 (0.48) | 26.26 (0.78)  | 34.52 (0.23)      |
| IR 79125 A         | 56  | 71.90 (2.04)  | 28.00 (1.42) | 2.77 (0.27) | 10.15 (0.16) | 18.92 (0.39)  | 36.58 (0.40)      |
| IR 79125 B         | 56  | 79.44 (1.80)  | 29.60 (1.46) | 1.14 (0.33) | 16.09 (0.37) | 28.22 (0.59)  | 36.24 (0.48)      |
| IR73717-46-1-3-3 R | 56  | 83.70 (1.61)  | 25.20 (2.10) | 1.20 (0.48) | 14.23 (0.91) | 24.43 (1.32)  | 36.84 (0.72)      |
| IR 82385 H         | 70  | 102.20 (2.16) | 42.00 (1.49) | 2.76 (1.37) | 35.53 (1.94) | 57.29 (3.21)  | 41.26 (0.45)      |
| IR 79125 A         | 70  | 99.75 (1.92)  | 39.20 (0.48) | 1.09 (0.44) | 31.95 (0.47) | 50.04 (0.47)  | 40.50 (0.73)      |
| IR 79125 B         | 70  | 97.20 (0.73)  | 37.60 (1.94) | 0.30 (0.80) | 29.73 (1.64) | 45.03 (2.42)  | 42.60 (0.44)      |
| IR73717-46-1-3-3 R | 70  | 106.00 (1.04) | 35.20 (1.30) | 1.69 (1.14) | 32.47 (1.48) | 49.16 (2.27)  | 40.38 (0.13)      |
| IR 82385 H         | 84  | 115.98 (1.58) | 19.60 (1.15) | 1.28 (1.18) | 27.93 (1.48) | 46.21 (2.52)  | 43.06 (0.55)      |
| IR 79125 A         | 84  | 104.72 (0.85) | 20.00 (1.56) | 0.59 (0.45) | 24.59 (0.94) | 37.18 (1.24)  | 43.60 (1.09)      |
| IR 79125 B         | 84  | 110.70 (1.85) | 21.20 (1.16) | 1.27 (0.48) | 18.92 (0.69) | 31.18 (0.97)  | 43.48 (0.36)      |
| IR73717-46-1-3-3 R | 84  | 104.96 (1.46) | 23.00 (0.51) | 1.49 (0.39) | 18.44 (0.59) | 28.92 (0.93)  | 41.14 (0.59)      |
| IR 82385 H         | 112 | 120.86 (0.87) | 30.90 (1.79) | 0.73 (2.01) | 63.55 (3.42) | 94.28 (5.39)B | 39.00 (0.62)      |
| IR 79125 A         | 98  | 108.06 (0.57) | 47.20 (3.38) | 0.43 (1.56) | 45.54 (3.18) | 66.96 (4.65)A | 39.92 (0.34)      |
| IR 79125 B         | 93  | 111.82 (0.69) | 24.60 (1.01) | 0.05 (0.81) | 24.13 (0.55) | 38.18 (1.25)A | 39.20 (0.33)      |
| IR73717-46-1-3-3 R | 93  | 104.76 (1.28) | 27.90 (1.04) | 1.76 (0.55) | 22.50 (0.95) | 33.26 (1.45)A | 40.04 (0.39)      |
| Time               |     |               | 35.649***    |             |              | 235.446***    | 17.262*** [5,75]  |
| Time x Accession)  |     |               | 3.021***     |             |              | 6.087***      | 0.572ns [15,75]   |
| Within contrasts   |     |               | 61.967***L   |             |              | 642.252***L   | 26.901***C [1,15] |
| Accession          |     |               | 0.993ns      |             |              | 7.567***      | 0.541ns [3,15]    |
| IR 82363 H         | 28  | 51.00 (0.72)  | 23.00 (1.30) | 0.62 (0.14) | 2.70 (0.23)  | 4.31 (0.37)   | 37.46 (0.39)      |
| IR 68897 A         | 28  | 45.80 (1.12)  | 20.00 (2.02) | 1.30 (0.13) | 2.28 (0.28)  | 3.58 (0.40)   | 37.58 (0.37)      |
| IR 68897 B         | 28  | 45.67 (2.08)  | 15.33 (3.66) | 2.07 (0.24) | 1.77 (0.48)  | 2.84 (0.71)   | 37.07 (1.05)      |
| SRT 3 R            | 28  | 42.30 (0.97)  | 11.80 (0.65) | 0.65 (0.06) | 1.02 (0.10)  | 1.67 (0.16)   | 38.12 (0.34)      |



|                  |     |               |                   |             |              |                    |                   |
|------------------|-----|---------------|-------------------|-------------|--------------|--------------------|-------------------|
| IR 82363 H       | 42  | 74.80 (2.10)  | 43.40 (2.59)      | 2.46 (0.31) | 9.51 (0.87)  | 16.97 (1.15)       | 38.30 (0.26)      |
| IR 68897 A       | 42  | 61.50 (0.24)  | 39.60 (1.81)      | 0.78 (0.26) | 6.43 (0.31)  | 12.21 (0.56)       | 38.00 (0.28)      |
| IR 68897 B       | 42  | 62.00 (1.00)  | 54.33 (3.53)      | 1.31 (0.45) | 8.09 (0.70)  | 15.40 (1.13)       | 38.30 (0.67)      |
| SRT 3 R          | 42  | 64.10 (0.59)  | 38.40 (1.17)      | 0.48 (0.20) | 5.68 (0.32)  | 11.16 (0.50)       | 40.50 (0.30)      |
| IR 82363 H       | 56  | 89.13 (1.42)  | 33.20 (1.71)      | 1.57 (0.84) | 20.43 (0.52) | 35.01 (1.31)       | 36.20 (0.29)      |
| IR 68897 A       | 56  | 77.58 (1.78)  | 27.60 (1.79)      | 1.35 (0.69) | 13.98 (1.05) | 24.34 (1.69)       | 37.14 (0.15)      |
| IR 68897 B       | 56  | 79.15 (2.13)  | 53.33 (0.77)      | 2.92 (1.57) | 21.84 (3.49) | 36.76 (5.00)       | 32.40 (0.49)      |
| SRT 3 R          | 56  | 77.18 (0.40)  | 23.20 (1.23)      | 0.94 (0.41) | 11.04 (0.40) | 20.98 (0.79)       | 38.28 (0.43)      |
| IR 82363 H       | 70  | 111.20 (1.90) | 47.80 (1.12)      | 1.93 (0.77) | 44.87 (1.61) | 65.80 (2.23)       | 38.02 (0.15)      |
| IR 68897 A       | 70  | 94.13 (1.82)  | 39.60 (1.55)      | 1.67 (0.82) | 30.81 (2.14) | 44.48 (2.94)       | 40.06 (0.30)      |
| IR 68897 B       | 70  | 97.00 (0.88)  | 34.00 (3.18)      | 0.25 (0.66) | 17.44 (0.82) | 27.69 (0.37)       | 39.50 (0.39)      |
| SRT 3 R          | 70  | 92.20 (0.65)  | 36.60 (1.07)      | 0.88 (0.99) | 28.56 (1.96) | 46.44 (2.93)       | 41.64 (0.49)      |
| IR 82363 H       | 84  | 111.50 (1.36) | 17.80 (0.92)      | 1.87 (0.45) | 17.25 (0.67) | 28.12 (1.07)       | 37.02 (0.40)      |
| IR 68897 A       | 84  | 92.16 (1.95)  | 37.40 (3.47)      | 1.50 (0.56) | 25.71 (0.95) | 39.21 (1.35)       | 38.86 (0.37)      |
| IR 68897 B       | 84  | 95.83 (1.73)  | 29.33 (3.86)      | 1.36 (2.02) | 17.22 (3.45) | 26.57 (5.34)       | 40.73 (0.13)      |
| SRT 3 R          | 84  | 100.56 (1.43) | 24.40 (1.90)      | 1.37 (0.92) | 26.07 (1.75) | 42.44 (2.67)       | 42.38 (0.36)      |
| IR 82363 H       | 93  | 114.68 (1.89) | 29.90 (1.32)AB    | 1.78 (0.77) | 28.39 (1.16) | 44.17 (1.70)B      | 37.80 (0.43)      |
| IR 68897 A       | 112 | 92.03 (0.27)  | 65.60 (3.17)B     | 0.53 (0.50) | 43.19 (0.78) | 59.72 (1.08)A      | 34.96 (0.34)      |
| IR 68897 B       | 93  | 102.97 (2.61) | 29.00 (0.67)B     | 2.65 (0.28) | 18.92 (0.58) | 28.58 (0.85)A      | 39.07 (1.43)      |
| SRT 3 R          | 112 | 108.25 (0.69) | 26.20 (0.67)A     | 0.51 (0.79) | 34.80 (0.83) | 53.30 (1.35)A      | 40.54 (0.38)      |
| Time             |     |               | 18.462*** [5,70]  |             |              | 133.577*** [5,70]  | 5.075*** [5,70]   |
| Time x Accession |     |               | 5.616*** [15,70]  |             |              | 2.973*** [15,70]   | 1.122ns [15,70]   |
| Within contrasts |     |               | 43.425***Q [1,14] |             |              | 794.312***L [1,14] | 11.149***L [1,14] |
| Accession        |     |               | 11.537*** [3,14]  |             |              | 6.838*** [3,14]    | 3.024ns [3,14]    |

1: Numbers are means (SEM) (N = 5); Degrees of freedom for Time = 5,80 and Time x Accession = 15,80; for within subject contrasts = 1,16; and for Accession = 3,16, unless indicated by square brackets; ns = P > 0.05, \* = P < 0.05, \*\* = P < 0.01, \*\*\* = P < 0.001; C = cubic, L = linear and Q = quadratic relation associated with within subject contrasts; uppercase numbers indicate homogenous line groups incorporating repeated measures (Tukey P > 0.05); 2: Note that some of the results for shoot biomass and tiller numbers have been summarized by plant-type and presented in a related paper by Horgan et al (2016); the data and information by accession and other data from this table have not been previously published.

Table S10: Hybrid growth parameters in field plots at IRRI. Results are summarized from Table S9 and visualized in Figure 2A-C.

| Accession  | Sampling Period (DAT) | Total Number of Tiller <sup>1,2</sup> | Total Plant Dry Weight (g) <sup>1,2,3</sup> | SPAD-value <sup>1,3</sup> |
|------------|-----------------------|---------------------------------------|---------------------------------------------|---------------------------|
| IR82396H   | 28                    | 16.00 (0.73)                          | 3.25 (0.22)abc                              | 39.04 (0.47)ab            |
|            | 42                    | 46.00 (2.85)                          | 14.02 (0.80)                                | 38.94 (0.42)              |
|            | 56                    | 28.40 (1.54)                          | 30.89 (1.58)                                | 36.44 (0.62)              |
|            | 70                    | 44.40 (1.74)                          | 52.84 (1.00)                                | 42.12 (0.31)              |
|            | 84                    | 26.20 (1.37)                          | 36.78 (0.91)                                | 42.15 (0.55)              |
|            | 98                    | 31.80 (1.80)                          | 42.85 (3.90)                                | 38.22 (0.56)              |
| IR 82391 H | 28                    | 15.60 (1.35)                          | 2.80 (0.31)ab                               | 38.24 (0.38)ab            |
|            | 42                    | 44.60 (1.80)                          | 14.20 (0.68)                                | 39.62 (0.48)              |
|            | 56                    | 31.00 (1.76)                          | 27.29 (1.05)                                | 36.92 (0.85)              |
|            | 70                    | 41.60 (1.53)                          | 50.63 (2.21)                                | 42.88 (0.27)              |
|            | 84                    | 24.80 (0.91)                          | 30.60 (1.03)                                | 40.92 (0.36)              |
|            | 93                    | 25.20 (1.80)                          | 30.36 (1.98)                                | 39.98 (0.59)              |
| IR 84714 H | 28                    | 17.80 (1.19)                          | 3.00 (0.21)a                                | 40.56 (0.28)b             |
|            | 42                    | 42.00 (2.55)                          | 14.06 (0.56)                                | 41.78 (0.51)              |
|            | 56                    | 28.20 (2.13)                          | 26.97 (1.20)                                | 38.12 (0.51)              |
|            | 70                    | 33.60 (1.45)                          | 42.17 (1.41)                                | 44.84 (0.26)              |
|            | 84                    | 20.00 (1.03)                          | 25.62 (0.90)                                | 43.80 (0.38)              |
|            | 93                    | 26.60 (0.76)                          | 32.31 (0.75)                                | 42.20 (0.30)              |
| IR 85471 H | 28                    | 17.60 (0.98)                          | 3.70 (0.30)abc                              | 38.32 (0.63)ab            |
|            | 42                    | 34.60 (1.90)                          | 13.79 (0.85)                                | 38.78 (0.37)              |
|            | 56                    | 28.20 (1.05)                          | 30.80 (0.67)                                | 37.42 (0.39)              |
|            | 70                    | 41.40 (1.20)                          | 57.37 (2.18)                                | 41.36 (0.30)              |
|            | 84                    | 20.60 (0.82)                          | 28.60 (0.45)                                | 42.04 (0.51)              |
|            | 93                    | 24.20 (1.02)                          | 31.43 (1.16)                                | 40.00 (0.31)              |
| IR 81954 H | 28                    | 18.80 (0.86)                          | 5.05 (0.34)abc                              | 37.64 (0.48)a             |
|            | 42                    | 36.00 (0.68)                          | 18.12 (0.18)                                | 38.80 (0.14)              |
|            | 56                    | 28.20 (2.18)                          | 39.28 (0.91)                                | 33.62 (0.27)              |
|            | 70                    | 40.80 (2.70)                          | 68.47 (1.52)                                | 39.62 (0.61)              |
|            | 84                    | 17.00 (0.47)                          | 37.15 (3.72)                                | 42.68 (0.62)              |
|            | 98                    | 19.00 (0.76)AB                        | 42.28 (1.43)                                | 38.50 (0.77)              |
| IR 80637 H | 28                    | 14.60 (1.43)                          | 3.44 (0.42)abc                              | 38.32 (0.63)ab            |

|                    |     |              |               |                |
|--------------------|-----|--------------|---------------|----------------|
|                    | 42  | 34.60 (1.82) | 15.84 (1.32)  | 38.86 (0.38)   |
|                    | 56  | 22.60 (1.44) | 25.03 (1.15)  | 35.50 (0.47)   |
|                    | 70  | 38.00 (0.97) | 63.45 (3.05)  | 40.40 (0.33)   |
|                    | 84  | 25.40 (0.32) | 39.11 (1.62)  | 41.70 (0.47)   |
|                    | 98  | 22.80 (0.94) | 51.23 (3.64)  | 37.46 (0.13)   |
| IR 82385 H         | 28  | 18.20 (1.23) | 3.43 (0.33)c  | 38.68 (0.36)ab |
|                    | 42  | 38.60 (2.29) | 12.97 (1.29)  | 38.56 (0.38)   |
|                    | 56  | 29.80 (1.06) | 26.26 (0.78)  | 34.52 (0.23)   |
|                    | 70  | 42.00 (1.49) | 57.29 (3.21)  | 41.26 (0.45)   |
|                    | 84  | 19.60 (1.15) | 46.21 (2.52)  | 43.06 (0.55)   |
|                    | 112 | 30.90 (1.79) | 94.28 (5.39)  | 39.00 (0.62)   |
| IR 82363 H         | 28  | 23.00 (1.30) | 4.31 (0.37)bc | 37.46 (0.39)a  |
|                    | 42  | 43.40 (2.59) | 16.97 (1.15)  | 38.30 (0.26)   |
|                    | 56  | 33.20 (1.71) | 35.01 (1.31)  | 36.20 (0.29)   |
|                    | 70  | 47.80 (1.12) | 65.80 (2.23)  | 38.02 (0.15)   |
|                    | 84  | 17.80 (0.92) | 28.12 (1.07)  | 37.02 (0.40)   |
|                    | 93  | 29.90 (1.32) | 44.17 (1.70)  | 37.80 (0.43)   |
| F-Time             |     | 76.569***    | 380.614***    | 6.614***       |
| F-Time x Accession |     | 52.621ns     | 3.678ns       | 0.621ns        |
| F-Accession        |     | 1.683ns      | 3.699***      | 3.030*         |

1: Numbers are means (SEM) (N = 5); Degrees of freedom for Time = 5,160, Time x Accession = 35,160; and for Accession = 7,32; ns = P > 0.05, \* = P < 0.05, \*\*\* = P < 0.001; lowercase letters indicate homogenous hybrid groups incorporating repeated measures (Tukey P > 0.05); 2: Note that some of the results for shoot biomass and tiller numbers have been summarized by plant-type and presented in a related paper by Horgan et al (2016); the data and information by accession and other data from this table have not been previously published. 3: Blue = heterosis, green = heterobeltiosis for biomass

Table S11: Plant reproductive parameters in field plots at IRRI. Results are summarized in Table S12 and Figure 2.

| Accession          | Proportion of Tillers with Panicles | Rachis Dry Weight (g) <sup>1</sup> | Dry Weight of Reproductive Structures (g) <sup>1</sup> | Number of Panicles <sup>1</sup> | Total Number of Filled Grain per Plant <sup>1</sup> | Total Dry Weight of Filled Grain per Plant (g) <sup>1</sup> | 1000-Grain Fresh Weight (g) <sup>1</sup> | Total Number of Unfilled Grains <sup>1</sup> | Proportion of Grain that was Unfilled <sup>1</sup> |
|--------------------|-------------------------------------|------------------------------------|--------------------------------------------------------|---------------------------------|-----------------------------------------------------|-------------------------------------------------------------|------------------------------------------|----------------------------------------------|----------------------------------------------------|
| IR82396H           | 29.60 (1.56)A                       | 3.18 (0.32)AB                      | 50.13 (4.87)                                           | 28.40 (2.69)A                   | 2079.40 (190.76)B                                   | 42.91 (4.15)B                                               | 21.71 (0.21)AB                           | 914.40 (112.64)A                             | 30.54 (3.71)A                                      |
| IR80156A           | 53.90 (0.91)B                       | 4.49 (0.13)B                       | 20.86 (0.73)                                           | 61.80 (0.97)B                   | 146.00 (28.70)A                                     | 2.69 (0.57)A                                                | 18.92 (0.31)A                            | 5249.20 (126.17)B                            | 97.29 (8.15)C                                      |
| IR80156B           | 27.40 (1.72)A                       | 2.34 (0.15)A                       | 35.10 (2.33)                                           | 25.20 (1.60)A                   | 1347.40 (100.60)AB                                  | 26.51 (1.76)AB                                              | 21.05 (0.22)AB                           | 1225.40 (128.30)A                            | 47.63 (5.61)B                                      |
| IR46R              | 28.50 (1.14)A                       | 3.16 (0.23)AB                      | 50.86 (4.74)                                           | 32.80 (1.63)A                   | 1891.20 (173.16)B                                   | 43.47 (4.20)B                                               | 24.12 (0.70)B                            | 943.40 (50.55)A                              | 33.28 (2.26)AB                                     |
| F-Accession        | 17.311***                           | 3.258*                             | 3.112ns                                                | 16.788***                       | 7.841***                                            | 7.674***                                                    | 5.377**                                  | 75.173***                                    | 89.284***                                          |
| IR 82391 H         | 24.00 (1.62)                        | 2.19 (0.16)A                       | 34.30 (2.36)AB                                         | 21.80 (1.57)                    | 1306.80 (102.61)AB                                  | 28.50 (2.16)B                                               | 23.12 (0.28)B                            | 840.40 (60.02)A                              | 39.14 (3.73)A                                      |
| IR 79156 A         | 27.60 (1.48)                        | 2.87 (0.15)AB                      | 16.94 (1.22)A                                          | 28.40 (0.33)                    | 474.60 (47.11)A                                     | 7.87 (0.78)A                                                | 17.51 (0.12)A                            | 2539.20 (.317)B                              | 84.25 (6.22)B                                      |
| IR 79156 B         | 32.10 (2.16)                        | 4.01 (0.20)B                       | 47.76 (2.39)B                                          | 33.60 (1.74)                    | 2076.40 (130.54)B                                   | 38.42 (1.88)B                                               | 20.20 (0.66)AB                           | 1393.20 (80.53)A                             | 40.15 (5.59)A                                      |
| IR60819-34-2       | 21.80 (0.38)                        | 2.78 (0.10)AB                      | 40.49 (1.47)B                                          | 24.20 (1.56)                    | 1567.80 (75.39)B                                    | 33.45 (1.47)B                                               | 22.66 (0.26)B                            | 949.60 (75.33)A                              | 37.72 (4.34)A                                      |
| F-Accession        | 1.684ns                             | 4.740*                             | 9.255***                                               | 2.667ns                         | 10.097***                                           | 13.140***                                                   | 8.841***                                 | 11.963***                                    | 21.230***                                          |
| IR 84714 H         | 24.50 (0.69)A                       | 2.14 (0.18)Aa                      | 39.70 (1.22)B                                          | 18.50 (1.70)A                   | 1216.35 (103.52)B                                   | 29.65 (2.55)B                                               | 25.88 (0.29)B                            | 637.50 (61.47)Aa                             | 34.39 (3.73)A                                      |
| IR 80559 A         | 53.70 (2.36)B                       | 4.34 (0.18)B                       | 19.97 (1.07)A                                          | 56.80 (2.78)B                   | 222.20 (22.69)A                                     | 4.52 (0.44)A                                                | 21.79 (0.22)A                            | 4341.20 (267.31)B                            | 95.13 (9.22)C                                      |
| IR 80559 B         | 29.80 (1.18)A                       | 2.34 (0.09)Aab                     | 38.91 (2.07)B                                          | 28.40 (1.15)A                   | 1495.80 (86.88)B                                    | 30.65 (2.01)B                                               | 21.43 (0.23)A                            | 1389.80 (55.15)Ab                            | 48.16 (3.88)B                                      |
| IR60819-34-2 R     | 21.70 (0.67)A                       | 3.29 (0.11)Abb                     | 45.97 (1.04)B                                          | 25.20 (0.59)A                   | 1851.80 (51.54)B                                    | 37.91 (0.75)B                                               | 21.73 (0.27)A                            | 1221.60 (122.18)Aab                          | 39.75 (7.03)A                                      |
| F-Accession        | 21.599***                           | 9.550***                           | 12.628***                                              | 18.522***                       | 18.270***                                           | 15.035***                                                   | 14.004***                                | 23.673***                                    | 150.792***                                         |
| IR 85471 H         | 23.20 (1.05)A                       | 2.44 (0.10)A                       | 44.29 (2.44)                                           | 22.80 (0.86)A                   | 1618.80 (87.44)B                                    | 38.53 (2.32)B                                               | 25.08 (0.37)                             | 752.20 (63.82)A                              | 31.73 (4.22)A                                      |
| IR 80564 A         | 53.70 (3.19)B                       | 6.39 (0.31)B                       | 31.22 (2.83)                                           | 62.60 (2.99)B                   | 283.30 (66.99)A                                     | 6.28 (1.68)A                                                | 20.88 (0.69)                             | 4772.39 (574.31)B                            | 94.40 (8.96)B                                      |
| IR 80564 B         | 22.60 (1.04)A                       | 2.23 (0.13)A                       | 39.96 (1.23)                                           | 22.00 (1.36)A                   | 1315.05 (93.66)B                                    | 29.24 (1.96)B                                               | 21.24 (1.07)                             | 793.90 (67.56)A                              | 37.64 (4.19)AB                                     |
| IR60819-34-2 R     | 21.70 (0.67)A                       | 3.29 (0.11)A                       | 45.97 (1.04)                                           | 25.20 (0.59)A                   | 1851.80 (51.54)B                                    | 37.91 (0.75)B                                               | 21.73 (0.27)                             | 1221.60 (122.18)A                            | 39.75 (7.03)AB                                     |
| F-Accession        | 15.227***                           | 22.275***                          | 2.102ns                                                | 26.108***                       | 16.250***                                           | 14.477***                                                   | 1.623ns                                  | 8.490***                                     | 4.555*                                             |
| IR 81954 H         | 17.50 (0.76)A                       | 3.09 (0.14)                        | 49.34 (1.56)AB                                         | 18.20 (0.52)                    | 1701.60 (66.31)B                                    | 42.15 (1.48)B                                               | 26.24 (0.19)B                            | 790.80 (59.50)A                              | 31.76 (4.73)A                                      |
| IR 70369 A         | 35.30 (0.76)B                       | 4.04 (0.14)                        | 22.60 (1.56)A                                          | 30.20 (0.52)                    | 378.00 (66.31)A                                     | 8.02 (1.48)A                                                | 22.06 (0.19)A                            | 2922.00 (59.50)B                             | 88.55 (4.73)B                                      |
| IR 70369 B         | 21.00 (2.21)A                       | 2.21 (0.42)                        | 44.32 (2.27)AB                                         | 18.00 (2.58)                    | 1569.60 (47.50)AB                                   | 39.57 (1.03)B                                               | 26.47 (0.22)B                            | 409.60 (393.67)A                             | 20.70 (8.93)A                                      |
| IR72889-46-3-2-1 R | 27.60 (1.79)AB                      | 4.48 (0.44)                        | 57.74 (6.29)B                                          | 35.20 (3.08)                    | 2268.40 (255.65)B                                   | 48.35 (5.58)B                                               | 22.34 (0.36)A                            | 1109.80 (89.66)AB                            | 32.85 (2.60)A                                      |
| F-Accession        | 4.953*                              | 2.052ns                            | 3.244*                                                 | 2.893ns                         | 6.132**                                             | 6.239***                                                    | 11.509***                                | 5.929**                                      | 62.372***                                          |
| IR 80637 H         | 21.50 (0.88)Aa                      | 3.94 (0.35)ab                      | 63.65 (5.70)B                                          | 23.60 (1.60)A                   | 2506.20 (238.19)C                                   | 54.74 (4.86)B                                               | 23.29 (0.30)B                            | 1082.80 (121.08)A                            | 30.17 (3.37)Aa                                     |
| IR 73328 A         | 45.50 (2.87)B                       | 3.77 (0.25)                        | 21.34 (1.10)A                                          | 49.00 (3.48)B                   | 287.40 (33.89)A                                     | 5.50 (0.61)A                                                | 20.57 (0.23)A                            | 3362.00 (407.50)B                            | 92.12 (9.23)B                                      |
| IR 73328 B         | 20.40 (0.97)Aa                      | 1.96 (0.13)a                       | 32.69 (2.23)AB                                         | 16.60 (1.26)A                   | 1179.00 (82.03)AB                                   | 27.51 (1.92)AB                                              | 24.63 (0.16)B                            | 647.60 (39.36)A                              | 35.45 (3.24)Ab                                     |
| IR73013-95-1-3-2 R | 29.80 (0.57)Ab                      | 4.19 (0.26)b                       | 52.99 (3.86)AB                                         | 29.00 (1.12)A                   | 1781.80 (117.45)BC                                  | 41.52 (3.02)B                                               | 24.41 (0.30)B                            | 1409.20 (93.32)AB                            | 44.16 (4.43)Ac                                     |

| F-Accession        | 10.483***     | 3.038ns       | 5.477**               | 8.872***      | 9.014***          | 9.627***      | 10.730***      | 6.023**           | 22.896***     |
|--------------------|---------------|---------------|-----------------------|---------------|-------------------|---------------|----------------|-------------------|---------------|
| IR 82385 H         | 28.70 (1.55)  | 3.43 (0.27)AB | 40.95 (1.58) <b>B</b> | 21.10 (0.95)A | 1451.00 (89.16)B  | 35.04 (1.34)B | 25.56 (0.10)   | 871.40 (79.28)Ab  | 37.51 (5.69)A |
| IR 79125 A         | 38.20 (3.13)  | 5.21 (0.50)B  | 20.20 (1.50)A         | 38.20 (3.32)B | 93.60 (13.63)A    | 2.05 (0.32)A  | 22.54 (0.53)   | 4267.80 (388.31)B | 97.85 (9.66)B |
| IR 79125 B         | 23.00 (0.84)  | 2.59 (0.24)A  | 42.28 (1.05)B         | 21.05 (1.78)A | 1254.05 (124.83)B | 29.13 (2.76)B | 21.21 (1.86)   | 759.85 (58.96)Ab  | 37.73 (3.21)A |
| IR73717-46-1-3-3 R | 24.00 (0.55)  | 1.86 (0.17)A  | 34.73 (1.71)AB        | 18.85 (1.61)A | 956.95 (65.16)B   | 25.79 (2.17)B | 24.37 (2.29)   | 344.95 (32.85)Aa  | 26.50 (3.35)A |
| F-Accession        | 2.920ns       | 8.849***      | 31.481***             | 5.490**       | 32.259***         | 32.662***     | 0.750ns        | 13.751***         | 79.213***     |
| IR 82363 H         | 27.80 (1.14)A | 2.86 (0.13)AB | 49.88 (2.62)B         | 23.40 (0.59)  | 1723.60 (86.61)B  | 43.27 (2.22)B | 26.48 (0.09)Cb | 641.80 (53.88)A   | 27.13 (3.84)A |
| IR 68897 A         | 54.30 (2.71)B | 4.18 (0.14)C  | 17.53 (0.54)A         | 37.80 (4.48)  | 127.60 (7.26)A    | 2.08 (0.16)A  | 17.23 (0.75)A  | 4070.20 (146.72)B | 96.96 (9.53)B |
| IR 68897 B         | 26.67 (0.84)A | 2.16 (0.07)A  | 43.52 (1.81)B         | 25.67 (1.39)  | 1791.33 (75.74)B  | 37.61 (1.27)B | 22.22 (0.28)Ba | 752.00 (59.07)A   | 29.57 (4.38)A |
| SRT 3 R            | 24.40 (0.33)A | 3.52 (0.11)BC | 50.74 (2.52)B         | 32.00 (1.33)  | 2036.20 (122.70)B | 42.64 (2.88)B | 21.85 (0.35)Ba | 845.80 (70.99)A   | 29.35 (3.67)A |
| F-Accession        | 15.134***     | 12.021***     | 8.503***              | 1.240ns       | 21.896***         | 19.738***     | 14.159***      | 62.044***         | 80.850***     |

1: Numbers are means (SEM) (N = 5); Degrees of freedom for Accession = 3,20; ns = P > 0.05, \* = P < 0.05, \*\*\* = P < 0.001; uppercase letters indicate homogenous accession groups (Tukey P > 0.05)

Table S12: Hybrid reproductive parameters in field plots at IRRI. Results are summarized from Table S11 and visualized in Figure 2D-F.

| Accession   | Proportion of Tillers with Panicles | Rachis Dry Weight (g) <sup>1,2</sup> | Dry Weight of Reproductive Structures (g) <sup>1</sup> | Number of Panicles <sup>1</sup> | Total Number of Filled Grain per Plant <sup>1,2</sup> | Total Dry Weight of Filled Grain per Plant (g) <sup>1</sup> | 1000-Grain Fresh Weight (g) <sup>1,2</sup> | Total Number of Unfilled Grains <sup>1,2</sup> | Proportion of Grain that was Unfilled <sup>1,2</sup> |
|-------------|-------------------------------------|--------------------------------------|--------------------------------------------------------|---------------------------------|-------------------------------------------------------|-------------------------------------------------------------|--------------------------------------------|------------------------------------------------|------------------------------------------------------|
| IR82396H    | 29.60 (1.56)                        | 3.18 (0.32)                          | 50.13 (4.87)AB                                         | 28.40 (2.69)                    | 2079.40 (190.76)B                                     | 42.91 (4.15)B                                               | 21.71 (0.21)A                              | 914.40 (112.64)                                | 30.54 (3.71)                                         |
| IR 82391 H  | 24.00 (1.62)                        | 2.19 (0.16)                          | 34.30 (2.36)A                                          | 21.80 (1.57)                    | 1306.80 (102.61)A                                     | 28.50 (2.16)A                                               | 23.12 (0.28)AB                             | 840.40 (60.02)                                 | 39.14 (3.73)                                         |
| IR 84714 H  | 24.50 (0.69)                        | 2.14 (0.18)                          | 39.70 (1.22)A                                          | 18.50 (1.70)                    | 1216.35 (103.52)A                                     | 29.65 (2.55)A                                               | 25.88 (0.29)C                              | 637.50 (61.47)                                 | 34.39 (3.73)                                         |
| IR 85471 H  | 23.20 (1.05)                        | 2.44 (0.10)                          | 44.29 (2.44)A                                          | 22.80 (0.86)                    | 1618.80 (87.44)AB                                     | 38.53 (2.32)A                                               | 25.08 (0.37)BC                             | 752.20 (63.82)                                 | 31.73 (4.22)                                         |
| IR 81954 H  | 17.50 (0.76)                        | 3.09 (0.14)                          | 49.34 (1.56)AB                                         | 18.20 (0.52)                    | 1701.60 (66.31)AB                                     | 42.15 (1.48)B                                               | 26.24 (0.19)C                              | 790.80 (59.50)                                 | 31.76 (4.73)                                         |
| IR 80637 H  | 21.50 (0.88)                        | 3.94 (0.35)                          | 63.65 (5.70)B                                          | 23.60 (1.60)                    | 2506.20 (238.19)B                                     | 54.74 (4.86)B                                               | 23.29 (0.30)AB                             | 1082.80 (121.08)                               | 30.17 (3.37)                                         |
| IR 82385 H  | 28.70 (1.55)                        | 3.43 (0.27)                          | 40.95 (1.58)A                                          | 21.10 (0.95)                    | 1451.00 (89.16)A                                      | 35.04 (1.34)A                                               | 25.56 (0.10)BC                             | 871.40 (79.28)                                 | 37.51 (5.69)                                         |
| IR 82363 H  | 27.80 (1.14)                        | 2.86 (0.13)                          | 49.88 (2.62)AB                                         | 23.40 (0.59)                    | 1723.60 (86.61)AB                                     | 43.27 (2.22)B                                               | 26.48 (0.09)C                              | 641.80 (53.88)                                 | 27.13 (3.84)                                         |
| F-Accession | 2.236ns                             | 1.058ns                              | 4.229***                                               | 1.707ns                         | 3.657***                                              | 4.071***                                                    | 9.939***                                   | 0.963ns                                        | 1.096ns                                              |

1: Numbers are means (SEM) (N = 5); Degrees of freedom for Accession = 7,34; ns = P > 0.05, \*\*\* = P < 0.001; uppercase letters indicate homogenous accession groups (Tukey P > 0.05); 2: Blue indicates heterosis, green indicates heterobeltilosis for fitness parameter

Table S13: Yields of filled and unfilled grain from crop cuts in field plots at IRRI. Results are summarized in Table 1

| Accession          | Harvest Time (DAT) | Filled Grain (Tonnes Hectare <sup>-1</sup> ) <sup>1,2</sup> | Unfilled Grain (Tonnes Hectare <sup>-1</sup> ) <sup>1,2</sup> | 1000 Grain Fresh Weight (g) <sup>1,2</sup> |
|--------------------|--------------------|-------------------------------------------------------------|---------------------------------------------------------------|--------------------------------------------|
| IR82396H           | 98                 | 6.43 (0.12)Cb                                               | 0.67 (0.05)                                                   | 21.12 (0.19)                               |
| IR80156A           | 112                | 0.68 (0.09)A                                                | 1.31 (0.11)                                                   | 20.72 (0.24)                               |
| IR80156B           | 93                 | 4.62 (0.19)BCab                                             | 1.04 (0.16)                                                   | 20.01 (0.16)                               |
| IR46R              | 112                | 3.10 (0.49)ABa                                              | 1.40 (0.43)                                                   | 20.17 (0.12)                               |
| F-Accession        |                    | 16.122***                                                   | 0.679ns                                                       | 1.536ns                                    |
| IR 82391 H         | 93                 | 5.73 (0.30)Cb                                               | 0.85 (0.03)                                                   | 20.90 (0.23)Bb                             |
| IR 79156 A         | 98                 | 1.57 (0.07)A                                                | 1.09 (0.77)                                                   | 19.10 (0.50)AB                             |
| IR 79156 B         | 98                 | 3.33 (0.26)ABa                                              | 0.63 (0.22)                                                   | 17.52 (0.33)Aa                             |
| IR60819-34-2       | 93                 | 4.15 (0.26)BCab                                             | 0.65 (0.44)                                                   | 19.85 (0.20)ABb                            |
| F-Accession        |                    | 10.251***                                                   | 2.954ns                                                       | 3.617*                                     |
| IR 84714 H         | 93                 | 7.02 (0.10)Dc                                               | 0.55 (0.36)                                                   | 22.67 (0.30)                               |
| IR 80559 A         | 112                | 0.38 (0.04)A                                                | 1.10 (0.47)                                                   | 20.95 (0.07)                               |
| IR 80559 B         | 93                 | 3.81 (0.08)Ba                                               | 0.81 (0.74)                                                   | 20.27 (0.40)                               |
| IR60819-34-2 R     | 98                 | 4.84 (0.08)Cb                                               | 1.60 (0.43)                                                   | 20.97 (0.20)                               |
| F-Accession        |                    | 252.981***                                                  | 0.858ns                                                       | 2.832ns                                    |
| IR 85471 H         | 93                 | 6.24 (0.18)Cb                                               | 0.70 (0.10)                                                   | 22.25 (0.49)                               |
| IR 80564 A         | 112                | 0.20 (0.02)A                                                | 1.86 (0.52)                                                   | 21.66 (0.11)                               |
| IR 80564 B         | 93                 | 5.02 (0.14)Ba                                               | 0.65 (0.77)                                                   | 21.30 (0.15)                               |
| IR60819-34-2 R     | 98                 | 4.84 (0.08)Ba                                               | 1.60 (0.43)                                                   | 20.97 (0.20)                               |
| F-Accession        |                    | 92.806***                                                   | 0.949ns                                                       | 0.761ns                                    |
| IR 81954 H         | 98                 | 5.68 (0.20)C                                                | 0.83 (0.34)                                                   | 25.25 (0.14)Bb                             |
| IR 70369 A         | 98                 | 0.37 (0.03)A                                                | 1.16 (0.76)                                                   | 22.34 (0.47)A                              |
| IR 70369 B         | 91                 | 3.93 (0.27)B                                                | 0.68 (0.56)                                                   | 22.23 (0.29)Aa                             |
| IR72889-46-3-2-1 R | 112                | 4.42 (0.14)B                                                | 0.92 (0.11)                                                   | 22.25 (0.16)Aa                             |
| F-Accession        |                    | 29.735***                                                   | 2.518ns                                                       | 5.001*                                     |
| IR 80637 H         | 98                 | 5.20 (0.33)B                                                | 0.71 (0.34)A                                                  | 22.47 (0.29)B                              |
| IR 73328 A         | 98                 | 0.63 (0.09)A                                                | 1.73 (0.20)B                                                  | 18.86 (0.46)A                              |
| IR 73328 B         | 91                 | 5.01 (0.06)B                                                | 0.62 (0.05)A                                                  | 20.86 (0.22)AB                             |

|                    |     |                  |                 |                |
|--------------------|-----|------------------|-----------------|----------------|
| IR73013-95-1-3-2 R | 112 | 5.17 (0.26)B     | 1.02 (0.79)A    | 21.52 (0.35)AB |
| F-Accession        |     | 21.941***        | 24.795***       | 4.045*         |
| IR 82385 H         | 112 | 6.38 (0.10)Cb    | 0.73 (0.43)ABab | 22.88 (0.78)   |
| IR 79125 A         | 98  | 0.31 (0.04)A     | 1.46 (0.51)C    | 21.59 (0.30)   |
| IR 79125 B         | 93  | 4.62 (0.22)Ba    | 1.05 (0.58)BCb  | 23.41 (0.17)   |
| IR73717-46-1-3-3 R | 93  | 5.30 (0.22)BCab  | 0.41 (0.68)Aa   | 25.07 (0.55)   |
| F-Accession        |     | 52.307***        | 15.739***       | 1.618ns        |
| IR 82363 H         | 93  | 6.30 (0.22)B     | 0.70 (0.54)A    | 23.50 (0.25)Bb |
| IR 68897 A         | 112 | 0.27 (0.02)A     | 1.51 (0.42)B    | 21.16 (0.15)AB |
| IR 68897 B         | 93  | 4.28 (0.99)B     | 1.01 (0.41)AB   | 17.54 (1.68)Aa |
| SRT 3 R            | 112 | 4.82 (0.12)B     | 0.76 (0.32)A    | 19.57 (0.48)Ba |
| F-Accession        |     | 19.665*** [7,14] | 4.994* [7,14]   | 4.322* [7,14]  |

1: Numbers are means (SEM) (N = 5); Degrees of freedom for Accession = 7,16, except where indicated by square brackets; \* = P < 0.05, \*\*\* = P < 0.001; uppercase letters indicate homogenous accession groups based on comparisons of all four plant types, lowercase letters indicate homogenous groups excluding the A-lines from analyses (Tukey P > 0.05); 2: Note that these results have been summarized by plant-type and presented in a related paper by Horgan et al (2016); the data and information by accession have not been previously published.



Table S14: Results from BlowVac sampling of rice field plots at IRRI. Results are summarized in Table 2

| Accession          | Sampling Time (DAT) | BPH (number per sample) | WBPH (Number per Sample) | Other Hemiptera (Number per Sample) | Virus Vectors (Number per Sample) |
|--------------------|---------------------|-------------------------|--------------------------|-------------------------------------|-----------------------------------|
| IR82396H           | 21                  | 0.20 (0.09)             | 2.80 (0.63)              | 0.00 (0.00)                         | 3.40 (0.91)                       |
| IR80156A           | 21                  | 0.20 (0.09)             | 2.60 (0.63)              | 0.00 (0.00)                         | 2.40 (0.60)                       |
| IR80156B           | 21                  | 0.00 (0.00)             | 2.60 (0.56)              | 0.20 (0.09)                         | 3.40 (1.00)                       |
| IR46R              | 21                  | 0.40 (0.11)             | 3.20 (0.94)              | 0.80 (0.36)                         | 5.20 (1.35)                       |
| IR82396H           | 56                  | 15.20 (2.38)            | 16.20 (2.99)             | 1.00 (0.45)                         | 43.00 (8.57)                      |
| IR80156A           | 56                  | 19.80 (2.68)            | 23.20 (2.92)             | 0.80 (1.29)                         | 28.80 (4.12)                      |
| IR80156B           | 56                  | 24.60 (4.32)            | 32.00 (3.47)             | 2.20 (0.76)                         | 26.00 (4.72)                      |
| IR46R              | 56                  | 21.40 (5.26)            | 33.00 (11.46)            | 0.60 (0.27)                         | 30.80 (9.52)                      |
| IR82396H           | 84                  | 0.80 (0.26)             | 3.20 (0.49)              | 0.40 (0.18)                         | 9.60 (1.08)A                      |
| IR80156A           | 84                  | 1.20 (0.22)             | 3.00 (0.48)              | 0.40 (0.18)                         | 11.80 (2.28)A                     |
| IR80156B           | 84                  | 0.40 (0.11)             | 2.40 (0.47)              | 1.80 (0.74)                         | 9.80 (1.77)B                      |
| IR46R              | 84                  | 1.60 (0.23)             | 4.80 (0.61)              | 0.60 (0.20)                         | 11.80 (2.35)AB                    |
| F-time             |                     | 20.558***               | 10.730***                | 11.763***                           | 3.197ns                           |
| F time x Accession |                     | 0.214ns                 | 0.307ns                  | 0.277ns                             | 0.938ns                           |
| F-accession        |                     | 0.204ns                 | 0.374ns                  | 0.227ns                             | 4.352*                            |
| IR 82391 H         | 21                  | 0.40 (0.18)             | 3.60 (0.87)              | 0.00 (0.00)                         | 2.80 (0.79)                       |
| IR 79156 A         | 21                  | 0.20 (0.09)             | 7.80 (1.45)              | 0.40 (0.18)                         | 5.00 (1.16)                       |
| IR 79156 B         | 21                  | 0.20 (0.09)             | 0.80 (0.22)              | 0.00 (0.00)                         | 0.60 (0.27)                       |
| IR60819-34-2       | 21                  | 0.40 (0.11)             | 4.20 (0.79)              | 0.00 (0.00)                         | 4.20 (1.05)                       |
| IR 82391 H         | 56                  | 11.60 (2.19)            | 27.40 (4.53)             | 1.20 (0.38)                         | 26.40 (4.57)                      |
| IR 79156 A         | 56                  | 30.20 (3.86)            | 33.20 (2.28)             | 0.80 (0.29)                         | 37.00 (6.21)                      |
| IR 79156 B         | 56                  | 36.80 (7.42)            | 43.40 (5.97)             | 0.20 (0.09)                         | 46.00 (7.87)                      |
| IR60819-34-2       | 56                  | 33.40 (5.74)            | 30.40 (6.47)             | 0.40 (0.18)                         | 23.20 (4.60)                      |
| IR 82391 H         | 84                  | 2.40 (0.30)             | 4.00 (0.87)              | 0.60 (0.27)                         | 13.80 (1.87)                      |
| IR 79156 A         | 84                  | 1.60 (0.46)             | 4.00 (0.60)              | 0.60 (0.27)                         | 16.40 (1.93)                      |
| IR 79156 B         | 84                  | 3.00 (0.40)             | 2.00 (0.57)              | 0.20 (0.09)                         | 9.80 (1.85)                       |
| IR60819-34-2       | 84                  | 0.60 (0.11)             | 2.40 (0.76)              | 0.40 (0.18)                         | 7.20 (0.69)                       |
| F-time             |                     | 29.262***               | 24.500***                | 31.148***                           | 63.717ns                          |
| F time x Accession |                     | 2.173ns                 | 1.494ns                  | 1.406ns                             | 0.856ns                           |
| F-accession        |                     | 0.245ns                 | 1.469ns                  | 0.963ns                             | 1.218ns                           |
| IR 84714 H         | 21                  | 1.00 (0.20)             | 5.60 (1.87)              | 0.00 (0.00)                         | 2.80 (0.60)                       |

|                    |    |               |               |             |               |
|--------------------|----|---------------|---------------|-------------|---------------|
| IR 80559 A         | 21 | 0.80 (0.26)   | 8.00 (1.22)   | 0.00 (0.00) | 2.60 (0.56)   |
| IR 80559 B         | 21 | 0.20 (0.09)   | 3.40 (0.64)   | 0.00 (0.00) | 2.00 (0.63)   |
| IR60819-34-2 R     | 21 | 0.00 (0.00)   | 1.20 (0.36)   | 0.00 (0.00) | 0.80 (0.36)   |
| IR 84714 H         | 56 | 14.40 (2.55)  | 12.80 (2.51)  | 0.80 (0.27) | 14.40 (2.55)  |
| IR 80559 A         | 56 | 51.80 (4.71)  | 63.60 (4.82)  | 2.80 (1.11) | 41.60 (4.79)  |
| IR 80559 B         | 56 | 56.80 (6.52)  | 59.80 (6.34)  | 1.20 (0.47) | 33.40 (5.53)  |
| IR60819-34-2 R     | 56 | 33.20 (4.01)  | 20.20 (4.07)  | 0.80 (0.22) | 21.60 (4.56)  |
| IR 84714 H         | 84 | 0.80 (0.22)AB | 8.40 (2.54)AB | 0.40 (0.18) | 7.00 (1.46)   |
| IR 80559 A         | 84 | 2.80 (0.22)B  | 9.20 (1.40)B  | 0.00 (0.00) | 18.60 (2.34)  |
| IR 80559 B         | 84 | 2.20 (0.30)AB | 3.80 (0.76)AB | 0.40 (0.18) | 14.60 (3.09)  |
| IR60819-34-2 R     | 84 | 0.80 (0.17)A  | 2.20 (0.50)A  | 0.20 (0.09) | 10.60 (1.33)  |
| F-time             |    | 34.620***     | 18.869***     | 38.958***   | 10.220***     |
| F time x Accession |    | 1.324ns       | 1.443ns       | 2.029ns     | 0.389ns       |
| F-accession        |    | 3.642*        | 3.575*        | 3.159ns     | 0.217ns       |
| IR 85471 H         | 21 | 1.00 (0.24)   | 4.20 (1.00)   | 0.20 (0.09) | 2.40 (0.50)   |
| IR 80564 A         | 21 | 0.20 (0.09)   | 3.60 (0.92)   | 0.00 (0.00) | 2.60 (0.77)   |
| IR 80564 B         | 21 | 0.00 (0.00)   | 1.20 (0.54)   | 0.00 (0.00) | 1.80 (0.61)   |
| IR60819-34-2 R     | 21 | 0.00 (0.00)   | 1.20 (0.36)   | 0.00 (0.00) | 0.80 (0.36)   |
| IR 85471 H         | 56 | 27.20 (7.65)  | 26.20 (6.37)  | 0.20 (6.09) | 34.00 (9.92)  |
| IR 80564 A         | 56 | 29.80 (5.70)  | 20.60 (3.96)  | 1.60 (0.65) | 51.00 (12.76) |
| IR 80564 B         | 56 | 32.40 (5.37)  | 27.40 (5.47)  | 0.20 (0.09) | 28.20 (5.57)  |
| IR60819-34-2 R     | 56 | 33.20 (4.01)  | 20.20 (4.07)  | 0.80 (0.22) | 21.60 (4.56)  |
| IR 85471 H         | 84 | 0.80 (0.17)   | 7.00 (0.81)   | 0.40 (0.18) | 8.20 (1.57)   |
| IR 80564 A         | 84 | 1.60 (0.33)   | 4.00 (0.82)   | 0.40 (0.08) | 10.20 (1.28)  |
| IR 80564 B         | 84 | 0.80 (0.26)   | 1.60 (0.65)   | 0.00 (0.00) | 9.00 (2.35)   |
| IR60819-34-2 R     | 84 | 0.80 (0.17)   | 2.20 (0.50)   | 0.20 (0.09) | 10.60 (1.33)  |
| F-time             |    | 33.285***     | 59.451***     | 9.997***    | 3.517*        |
| F time x Accession |    | 1.395ns       | 1.262ns       | 0.454ns     | 0.726ns       |
| F-accession        |    | 0.246ns       | 1.163ns       | 0.468ns     | 2.135ns       |
| IR 81954 H         | 21 | 2.40 (0.87)   | 7.80 (0.64)   | 0.00 (0.00) | 2.40 (0.59)   |
| IR 70369 A         | 21 | 0.60 (0.18)   | 6.80 (0.85)   | 0.00 (0.00) | 2.60 (0.68)   |
| IR 70369 B         | 21 | 0.40 (0.11)   | 5.60 (0.56)   | 0.00 (0.00) | 6.00 (1.86)   |
| IR72889-46-3-2-1 R | 21 | 0.00 (0.00)   | 6.20 (0.93)   | 0.00 (0.00) | 1.80 (0.52)   |
| IR 81954 H         | 56 | 25.00 (3.97)  | 43.60 (7.79)  | 0.20 (0.09) | 33.20 (6.35)  |

|                    |    |               |               |             |                 |
|--------------------|----|---------------|---------------|-------------|-----------------|
| IR 70369 A         | 56 | 47.60 (7.92)  | 62.00 (6.90)  | 1.60 (0.65) | 55.80 (9.43)    |
| IR 70369 B         | 56 | 48.80 (2.81)  | 59.20 (5.66)  | 3.00 (0.73) | 51.20 (9.13)    |
| IR72889-46-3-2-1 R | 56 | 35.60 (5.07)  | 35.40 (5.05)  | 1.40 (0.53) | 31.80 (7.07)    |
| IR 81954 H         | 84 | 1.20 (0.26)   | 7.00 (2.50)   | 0.00 (0.00) | 3.80 (0.87)A    |
| IR 70369 A         | 84 | 1.00 (0.14)   | 3.60 (1.21)   | 0.00 (0.00) | 7.80 (1.27)AB   |
| IR 70369 B         | 84 | 1.00 (0.14)   | 5.60 (0.83)   | 0.20 (0.09) | 10.00 (1.64)B   |
| IR72889-46-3-2-1 R | 84 | 0.80 (0.17)   | 1.00 (0.36)   | 0.40 (0.18) | 7.80 (1.86)AB   |
| F-time             |    | 48.206***     | 16.436***     | 23.089***   | 19.636***       |
| F time x Accession |    | 0.492ns       | 1.061ns       | 0.506ns     | 2.022ns         |
| F-accession        |    | 0.519ns       | 0.709ns       | 0.747ns     | 3.904*          |
| IR 80637 H         | 21 | 0.40 (0.18)   | 5.40 (1.14)   | 0.00 (0.00) | 2.60 (0.57)     |
| IR 73328 A         | 21 | 0.00 (0.00)   | 3.00 (0.93)   | 0.20 (0.09) | 2.20 (0.65)     |
| IR 73328 B         | 21 | 1.80 (0.43)   | 3.80 (1.16)   | 0.00 (0.00) | 3.20 (0.76)     |
| IR73013-95-1-3-2 R | 21 | 0.40 (0.11)   | 6.40 (1.84)   | 0.00 (0.40) | 2.20 (0.77)     |
| IR 80637 H         | 56 | 27.20 (3.70)  | 37.40 (5.80)  | 1.00 (0.38) | 16.60 (3.97)    |
| IR 73328 A         | 56 | 27.00 (6.31)  | 32.60 (6.72)  | 1.00 (0.45) | 29.00 (6.59)    |
| IR 73328 B         | 56 | 57.80 (6.28)  | 50.00 (8.68)  | 0.80 (0.29) | 46.40 (9.23)    |
| IR73013-95-1-3-2 R | 56 | 31.60 (3.16)  | 15.60 (3.10)  | 1.20 (0.45) | 11.80 (2.65)    |
| IR 80637 H         | 84 | 0.60 (0.11)   | 1.60 (0.61)   | 0.40 (0.18) | 2.80 (0.68)     |
| IR 73328 A         | 84 | 0.80 (0.26)   | 1.60 (0.42)   | 1.20 (0.47) | 10.00 (1.61)    |
| IR 73328 B         | 84 | 0.60 (0.11)   | 2.20 (0.56)   | 0.40 (0.18) | 4.40 (1.04)     |
| IR73013-95-1-3-2 R | 84 | 2.40 (0.86)   | 6.80 (2.14)   | 0.60 (0.20) | 3.80 (1.12)     |
| F-time             |    | 33.499***     | 24.607***     | 18.927***   | 6.737***        |
| F time x Accession |    | 0.386ns       | 1.330ns       | 2.219ns     | 0.348ns         |
| F-accession        |    | 2.362ns       | 0.067ns       | 2.257ns     | 0.368ns         |
| IR 82385 H         | 21 | 0.20 (0.09)   | 6.20 (1.41)   | 0.20 (0.09) | 3.20 (1.02)     |
| IR 79125 A         | 21 | 0.80 (0.36)   | 3.00 (0.63)   | 0.00 (0.00) | 2.80 (0.66)     |
| IR 79125 B         | 21 | 1.40 (0.52)   | 2.20 (0.62)   | 0.00 (0.00) | 2.20 (0.63)     |
| IR73717-46-1-3-3 R | 21 | 1.40 (0.52)   | 1.80 (0.50)   | 0.00 (0.80) | 3.80 (0.80)     |
| IR 82385 H         | 56 | 40.40 (5.70)  | 29.20 (3.73)  | 0.60 (0.27) | 38.80 (8.01)    |
| IR 79125 A         | 56 | 68.60 (21.67) | 73.40 (23.26) | 3.40 (1.22) | 261.00 (102.32) |
| IR 79125 B         | 56 | 30.20 (3.02)  | 22.00 (4.16)  | 1.00 (0.29) | 40.60 (6.49)    |
| IR73717-46-1-3-3 R | 56 | 44.20 (1.45)  | 30.00 (4.06)  | 0.40 (0.18) | 44.20 (7.24)    |
| IR 82385 H         | 84 | 1.40 (0.23)   | 6.60 (1.00)   | 1.00 (0.31) | 7.80 (1.29)     |

|                    |    |               |               |             |               |
|--------------------|----|---------------|---------------|-------------|---------------|
| IR 79125 A         | 84 | 0.60 (0.27)   | 1.60 (0.32)   | 0.00 (0.00) | 10.80 (2.62)  |
| IR 79125 B         | 84 | 1.00 (0.35)   | 3.40 (0.68)   | 0.60 (0.00) | 8.20 (1.52)   |
| IR73717-46-1-3-3 R | 84 | 0.60 (0.18)   | 3.00 (0.72)   | 0.20 (0.09) | 7.00 (1.18)   |
| F-time             |    | 68.898***     | 44.754***     | 3.152ns     | 9.207***      |
| F time x Accession |    | 0.495ns       | 0.559ns       | 0.837ns     | 0.497ns       |
| F-accession        |    | 0.785ns       | 0.851ns       | 0.853ns     | 1.181ns       |
| IR 82363 H         | 21 | 1.00 (0.24)   | 6.00 (0.87)   | 0.00 (0.00) | 6.60 (1.40)   |
| IR 68897 A         | 21 | 0.20 (0.09)   | 4.20 (0.94)   | 0.20 (0.09) | 5.80 (1.30)   |
| IR 68897 B         | 21 | 0.00 (0.00)   | 5.67 (2.19)   | 0.00 (0.00) | 6.00 (2.52)   |
| SRT 3 R            | 21 | 0.00 (0.00)   | 3.00 (0.44)   | 0.00 (0.00) | 0.60 (0.27)   |
| IR 82363 H         | 56 | 23.20 (3.37)  | 34.80 (5.01)  | 0.00 (0.00) | 24.40 (4.47)  |
| IR 68897 A         | 56 | 16.00 (3.56)  | 33.80 (4.83)  | 0.80 (0.36) | 28.80 (6.38)  |
| IR 68897 B         | 56 | 36.00 (18.08) | 45.33 (30.07) | 0.33 (0.33) | 40.00 (10.02) |
| SRT 3 R            | 56 | 39.80 (9.16)  | 34.20 (3.36)  | 0.80 (0.27) | 31.80 (6.91)  |
| IR 82363 H         | 84 | 1.40 (0.39)   | 3.20 (0.89)   | 0.20 (0.09) | 9.20 (1.34)   |
| IR 68897 A         | 84 | 1.40 (0.33)   | 3.80 (0.57)   | 0.20 (0.09) | 23.00 (3.12)  |
| IR 68897 B         | 84 | 1.67 (0.88)   | 2.67 (1.20)   | 0.67 (0.67) | 11.33 (1.20)  |
| SRT 3 R            | 84 | 0.60 (0.27)   | 2.60 (0.58)   | 0.20 (0.09) | 5.60 (1.05)   |
| F-time             |    | 119.528***    | 14.733***     | 17.508***   | 2.288ns       |
| F time x Accession |    | 1.339ns       | 0.157ns       | 0.853ns     | 0.679ns       |
| F-accession        |    | 1.433ns       | 0.234ns       | 0.725ns     | 1.091ns       |

1: Numbers are means (SEM) (N = 5); Degrees of freedom for Time = 2,32, Time x Accession = 6,32 and Accession = 3,16; ns = P > 0.05, \* = P < 0.05, \*\*\* = P < 0.001; uppercase letters indicate homogenous accession groups based on repeated measures (Tukey P > 0.05); 2: Note that the results for BPH and WBPH have been summarized by plant-type and presented in a related paper by Horgan et al (2016); the data and information by accession, and other data from this table have not been previously published.

Table S15: Results from egg mass sampling and dissections of rice plants sampled from rice field plots at IRRI indicating the occurrence of Lepidopteran defoliators and stemborers. Results are summarized in Table 3

| Accession            | Period | Number of Leaf<br>folders per<br>Plant <sup>1,2</sup> | Number of Green<br>Hairy Caterpillars<br>per Plant <sup>1,2</sup> | Number of PSB<br>per Plant <sup>1,2</sup> | Number of SSB<br>per Plant <sup>1,2</sup> | Number of YSB<br>per Plant <sup>1,2</sup> | Proportion of<br>Deadheart Tillers<br>per Plant <sup>1,2</sup> | Proportion of<br>Whitehead Tillers<br>per Plant <sup>1,2</sup> | Number of YSB Egg<br>Masses per Plant <sup>1</sup> |
|----------------------|--------|-------------------------------------------------------|-------------------------------------------------------------------|-------------------------------------------|-------------------------------------------|-------------------------------------------|----------------------------------------------------------------|----------------------------------------------------------------|----------------------------------------------------|
| IR82396H             | 56     | 0.33 (0.03)                                           | 0.03 (0.01)                                                       | 0.00 (0.00)                               | 0.00 (0.00)                               | 0.40 (0.13)                               | 0.03 (0.01)                                                    |                                                                | 0.00 (0.00)                                        |
| IR80156A             | 56     | 0.19 (0.02)                                           | 0.04 (0.00)                                                       | 0.00 (0.00)                               | 0.00 (0.00)                               | 0.30 (0.05)                               | 0.04 (0.01)                                                    |                                                                | 0.40 (0.18)                                        |
| IR80156B             | 56     | 0.38 (0.08)                                           | 0.05 (0.01)                                                       | 0.00 (0.00)                               | 0.00 (0.00)                               | 0.10 (0.04)                               | 0.02 (0.00)                                                    |                                                                | 0.00 (0.00)                                        |
| IR46R                | 56     | 0.27 (0.03)                                           | 0.04 (0.01)                                                       | 0.00 (0.00)                               | 0.00 (0.00)                               | 0.10 (0.04)                               | 0.04 (0.01)                                                    |                                                                | 0.00 (0.00)                                        |
| IR82396H             | 84     | 0.89 (0.08)                                           | 0.67 (0.14)                                                       | 0.00 (0.00)                               | 0.00 (0.00)                               | 0.00 (0.00)                               | 0.01 (0.00)                                                    | 0.00 (0.00)                                                    |                                                    |
| IR80156A             | 84     | 0.54 (0.04)                                           | 0.23 (0.05)                                                       | 0.00 (0.00)                               | 0.20 (0.09)                               | 0.00 (0.00)                               | 0.00 (0.00)                                                    | 0.02 (0.01)                                                    |                                                    |
| IR80156B             | 84     | 0.26 (0.03)                                           | 0.53 (0.10)                                                       | 0.00 (0.00)                               | 0.00 (0.00)                               | 0.00 (0.00)                               | 0.00 (0.00)                                                    | 0.01 (0.00)                                                    |                                                    |
| IR46R                | 84     | 0.79 (0.08)                                           | 0.38 (0.07)                                                       | 0.00 (0.00)                               | 0.00 (0.00)                               | 0.00 (0.00)                               | 0.01 (0.01)                                                    | 0.07 (0.03)                                                    |                                                    |
| IR82396H             | 98     | 0.55 (0.04)C                                          | 0.22 (0.03)                                                       | 0.60 (0.18)                               | 0.40 (0.18)                               | 1.60 (0.39)AB                             | 0.07 (0.01)                                                    | 0.15 (0.02)AB                                                  |                                                    |
| IR80156A             | 112    | 0.22 (0.03)A                                          | 0.23 (0.05)                                                       | 0.60 (0.18)                               | 0.40 (0.18)                               | 2.80 (0.26)A                              | 0.11 (0.03)                                                    | 0.21 (0.03)B                                                   |                                                    |
| IR80156B             | 93     | 0.52 (0.02)AB                                         | 0.66 (0.11)                                                       | 0.00 (0.00)                               | 0.00 (0.00)                               | 0.20 (0.09)AB                             | 0.00 (0.00)                                                    | 0.01 (0.00)A                                                   |                                                    |
| IR46R                | 112    | 0.64 (0.07)BC                                         | 0.26 (0.03)                                                       | 0.40 (0.11)                               | 0.60 (0.27)                               | 4.20 (0.55)B                              | 0.06 (0.01)                                                    | 0.26 (0.02)B                                                   |                                                    |
| F-Period             |        | 2.507ns                                               | 0.792ns                                                           |                                           |                                           |                                           |                                                                |                                                                |                                                    |
| F-Period x Accession |        | 2.562ns                                               | 1.003ns                                                           | 3.00                                      | 16.00                                     |                                           |                                                                |                                                                |                                                    |
| F-Accession          |        | 5.022**                                               | 1.548ns                                                           | 0.842ns                                   | 0.373ns                                   | 4.338*                                    | 0.380ns                                                        | 4.959*                                                         | 1.000ns                                            |
| IR 82391 H           | 56     | 0.19 (0.02)                                           | 0.11 (0.04)                                                       | 0.00 (0.00)                               | 0.00 (0.00)                               | 0.40 (0.08)                               | 0.06 (0.01)B                                                   |                                                                | 0.80 (0.17)                                        |
| IR 79156 A           | 56     | 0.25 (0.02)                                           | 0.05 (0.01)                                                       | 0.00 (0.00)                               | 0.00 (0.00)                               | 0.20 (0.09)                               | 0.02 (0.00)A                                                   |                                                                | 0.00 (0.00)                                        |
| IR 79156 B           | 56     | 0.35 (0.02)                                           | 0.06 (0.01)                                                       | 0.00 (0.00)                               | 0.00 (0.00)                               | 0.00 (0.00)                               | 0.02 (0.01)AB                                                  |                                                                | 0.80 (0.17)                                        |
| IR60819-34-2         | 56     | 0.30 (0.05)                                           | 0.02 (0.00)                                                       | 0.00 (0.00)                               | 0.00 (0.00)                               | 0.10 (0.04)                               | 0.01 (0.00)A                                                   |                                                                | 0.20 (0.09)                                        |
| IR 82391 H           | 84     | 0.50 (0.07)                                           | 0.52 (0.12)                                                       | 0.10 (0.00)                               | 0.40 (0.18)                               | 0.00 (0.00)                               | 0.01 (0.00)                                                    | 0.00 (0.00)                                                    |                                                    |
| IR 79156 A           | 84     | 0.50 (0.05)                                           | 0.20 (0.03)                                                       | 0.20 (0.00)                               | 0.20 (0.00)                               | 0.20 (0.09)                               | 0.01 (0.00)                                                    | 0.01 (0.00)                                                    |                                                    |
| IR 79156 B           | 84     | 0.21 (0.03)                                           | 0.14 (0.02)                                                       | 0.00 (0.00)                               | 0.00 (0.00)                               | 0.00 (0.00)                               | 0.01 (0.00)                                                    | 0.01 (0.00)                                                    |                                                    |
| IR60819-34-2         | 84     | 0.95 (0.08)                                           | 0.23 (0.06)                                                       | 0.00 (0.00)                               | 0.20 (0.09)                               | 0.40 (0.11)                               | 0.00 (0.00)                                                    | 0.06 (0.01)                                                    |                                                    |
| IR 82391 H           | 93     | 0.30 (0.05)A                                          | 0.83 (0.12)                                                       | 0.00 (0.00)                               | 0.00 (0.00)                               | 0.00 (0.00)A                              | 0.03 (0.02)                                                    | 0.01 (0.00)A                                                   |                                                    |
| IR 79156 A           | 98     | 0.33 (0.05)A                                          | 0.53 (0.09)                                                       | 0.40 (0.18)                               | 0.20 (0.09)                               | 1.20 (0.54)AB                             | 0.02 (0.01)                                                    | 0.12 (0.01)BC                                                  |                                                    |
| IR 79156 B           | 98     | 0.26 (0.04)A                                          | 0.50 (0.07)                                                       | 0.00 (0.00)                               | 0.00 (0.00)                               | 3.00 (0.32)B                              | 0.02 (0.00)                                                    | 0.23 (0.01)C                                                   |                                                    |
| IR60819-34-2         | 93     | 0.81 (0.11)B                                          | 0.56 (0.09)                                                       | 0.40 (0.11)                               | 0.20 (0.09)                               | 0.40 (0.18)AB                             | 0.00 (0.00)                                                    | 0.05 (0.01)AB                                                  |                                                    |
| F-Period             |        | 1.307ns                                               | 7.027*                                                            |                                           |                                           |                                           |                                                                |                                                                |                                                    |

|                      |     |                 |               |             |             |                |             |               |             |
|----------------------|-----|-----------------|---------------|-------------|-------------|----------------|-------------|---------------|-------------|
| F-Period x Accession |     | 0.305ns         | 0.010ns       |             |             |                |             |               |             |
| F-Accession          |     | 7.795***        | 1.552ns       | 0.970ns     | 0.667ns     | 3.371*         | 4.578*      | 14.887***     | 2.125ns     |
| F-Leafiness          |     |                 | 12.355***     |             |             |                |             |               |             |
| IR 84714 H           | 56  | 0.24 (0.04)     | 0.05 (0.01)   | 0.00 (0.00) | 0.00 (0.00) | 0.00 (0.00)    | 0.03 (0.01) |               | 0.40 (0.11) |
| IR 80559 A           | 56  | 0.32 (0.05)     | 0.04 (0.01)   | 0.00 (0.00) | 0.00 (0.00) | 0.00 (0.00)    | 0.01 (0.00) |               | 0.00 (0.00) |
| IR 80559 B           | 56  | 0.39 (0.04)     | 0.06 (0.00)   | 0.00 (0.00) | 0.00 (0.00) | 0.10 (0.04)    | 0.01 (0.00) |               | 0.00 (0.00) |
| IR60819-34-2 R       | 56  | 0.13 (0.02)     | 0.04 (0.01)   | 0.00 (0.00) | 0.00 (0.00) | 0.10 (0.04)    | 0.02 (0.01) |               | 0.20 (0.09) |
| IR 84714 H           | 84  | 0.52 (0.04)     | 0.38 (0.06)   | 0.00 (0.00) | 0.00 (0.00) | 0.00 (0.00)    | 0.01 (0.00) | 0.00 (0.00)   |             |
| IR 80559 A           | 84  | 0.65 (0.09)     | 0.32 (0.03)   | 0.20 (0.09) | 0.20 (0.09) | 0.00 (0.00)    | 0.01 (0.00) | 0.00 (0.00)   |             |
| IR 80559 B           | 84  | 0.39 (0.03)     | 0.24 (0.02)   | 0.20 (0.09) | 0.20 (0.09) | 0.00 (0.00)    | 0.01 (0.00) | 0.01 (0.00)   |             |
| IR60819-34-2 R       | 84  | 0.63 (0.06)     | 0.26 (0.06)   | 0.00 (0.00) | 0.00 (0.00) | 0.20 (0.09)    | 0.00 (0.00) | 0.02 (0.01)   |             |
| IR 84714 H           | 93  | 0.76 (0.10)AB   | 0.84 (1.00)B  | 0.00 (1.00) | 0.00 (1.00) | 0.00 (0.00)Aa  | 0.00 (0.00) | 0.00 (0.00)Aa |             |
| IR 80559 A           | 112 | 0.23 (0.02)A    | 0.21 (0.05)A  | 0.00 (0.00) | 0.40 (0.18) | 6.60 (0.99)B   | 0.07 (0.02) | 0.22 (0.02)B  |             |
| IR 80559 B           | 93  | 0.59 (0.05)AB   | 0.45 (0.08)AB | 0.00 (0.00) | 0.00 (0.00) | 0.00 (0.00)Aa  | 0.00 (0.00) | 0.04 (0.01)Aa |             |
| IR60819-34-2 R       | 98  | 1.05 (0.07)B    | 0.51 (0.05)AB | 0.20 (0.09) | 0.20 (0.09) | 2.60 (0.30)ABb | 0.06 (0.01) | 0.22 (0.02)Bb |             |
| F-Period             |     | 1.194ns         | 1.144ns       |             |             |                |             |               |             |
| F-Period x Accession |     | 3.194*          | 3.556*        |             |             |                |             |               |             |
| F-Accession          |     | 3.112*          | 7.842***      | 1.000ns     | 0.444ns     | 7.308***       | 0.327ns     | 15.185***     | 1.467ns     |
| F-Height             |     | 0.581ns         | 9.905***      |             |             |                |             |               |             |
| F-Leafiness          |     | 2.530ns         | 15.841***     |             |             |                |             |               |             |
| IR 85471 H           | 56  | 0.24 (0.02)     | 0.02 (0.00)   | 0.00 (0.00) | 0.00 (0.00) | 0.10 (0.04)    | 0.01 (0.00) |               | 0.40 (0.11) |
| IR 80564 A           | 56  | 0.23 (0.04)     | 0.04 (0.01)   | 0.00 (0.00) | 0.00 (0.00) | 0.20 (0.09)    | 0.04 (0.01) |               | 0.00 (0.00) |
| IR 80564 B           | 56  | 0.38 (0.02)     | 0.11 (0.02)   | 0.00 (0.00) | 0.00 (0.00) | 0.30 (0.09)    | 0.03 (0.01) |               | 0.00 (0.00) |
| IR60819-34-2 R       | 56  | 0.13 (0.02)     | 0.04 (0.01)   | 0.00 (0.00) | 0.00 (0.00) | 0.10 (0.04)    | 0.02 (0.01) |               | 0.20 (0.09) |
| IR 85471 H           | 84  | 0.88 (0.08)     | 0.32 (0.06)   | 0.00 (0.00) | 0.00 (0.00) | 0.40 (0.18)    | 0.03 (0.01) | 0.04 (0.01)   |             |
| IR 80564 A           | 84  | 0.31 (0.05)     | 0.43 (0.08)   | 0.20 (0.09) | 0.20 (0.09) | 0.00 (0.00)    | 0.01 (0.01) | 0.02 (0.01)   |             |
| IR 80564 B           | 84  | 0.58 (0.07)     | 0.55 (0.08)   | 0.00 (0.00) | 0.00 (0.00) | 0.00 (0.00)    | 0.00 (0.00) | 0.00 (0.00)   |             |
| IR60819-34-2 R       | 84  | 0.63 (0.06)     | 0.26 (0.06)   | 0.00 (0.00) | 0.00 (0.00) | 0.20 (0.09)    | 0.00 (0.00) | 0.02 (0.01)   |             |
| IR 85471 H           | 93  | 0.89 (0.04)Cb   | 0.69 (0.05)   | 0.20 (0.09) | 0.00 (0.00) | 0.40 (0.11)a   | 0.00 (0.00) | 0.04 (0.01)Aa |             |
| IR 80564 A           | 112 | 0.15 (0.01)A    | 0.21 (0.02)   | 1.20 (0.26) | 0.00 (0.00) | 4.80 (0.42)    | 0.05 (0.01) | 0.22 (0.01)B  |             |
| IR 80564 B           | 93  | 0.45 (0.05)ABa  | 0.56 (0.08)   | 0.00 (0.00) | 0.00 (0.00) | 0.20 (0.09)a   | 0.01 (0.00) | 0.05 (0.01)Aa |             |
| IR60819-34-2 R       | 98  | 1.05 (0.07)BCab | 0.51 (0.05)   | 0.20 (0.09) | 0.20 (0.09) | 2.60 (0.30)b   | 0.06 (0.01) | 0.22 (0.02)Bb |             |
| F-Period             |     | 0.153ns         | 1.034ns       |             |             |                |             |               |             |
| F-Period x Accession |     | 2.060ns         | 1.744ns       |             |             |                |             |               |             |

| F-Accession          |     | 10.994***     | 1.153ns       | 2.794ns     | 1.000ns      | 1.761ns (9.500***) | 0.617ns        | 14.441***     | 1.467ns     |
|----------------------|-----|---------------|---------------|-------------|--------------|--------------------|----------------|---------------|-------------|
| IR 81954 H           | 56  | 0.26 (0.03)   | 0.02 (0.00)   | 0.00 (0.00) | 0.00 (0.00)  | 0.10 (0.04)        | 0.03 (0.01)    |               | 0.20 (0.09) |
| IR 70369 A           | 56  | 0.38 (0.05)   | 0.04 (0.01)   | 0.00 (0.00) | 0.00 (0.00)  | 0.20 (0.05)        | 0.02 (0.00)    |               | 0.00 (0.00) |
| IR 70369 B           | 56  | 0.36 (0.06)   | 0.05 (0.02)   | 0.10 (0.04) | 0.00 (0.00)  | 0.10 (0.04)        | 0.06 (0.02)    |               | 0.00 (0.00) |
| IR72889-46-3-2-1 R   | 56  | 0.20 (0.02)   | 0.07 (0.01)   | 0.00 (0.00) | 0.00 (0.00)  | 0.00 (0.00)        | 0.01 (0.00)    |               | 0.20 (0.09) |
| IR 81954 H           | 84  | 0.66 (0.11)   | 0.22 (1.06)   | 0.00 (1.00) | 0.00 (0.00)  | 0.20 (0.09)        | 0.02 (0.01)    | 0.05 (0.02)   |             |
| IR 70369 A           | 84  | 0.64 (0.06)   | 0.13 (0.04)   | 0.00 (0.00) | 0.00 (0.00)  | 0.00 (0.00)        | 0.01 (0.00)    | 0.01 (0.00)   |             |
| IR 70369 B           | 84  | 0.55 (0.05)   | 0.52 (0.03)   | 0.20 (0.09) | 0.00 (0.00)  | 0.60 (0.27)        | 0.02 (0.01)    | 0.03 (0.01)   |             |
| IR72889-46-3-2-1 R   | 84  | 0.35 (0.03)   | 0.33 (0.08)   | 0.00 (0.00) | 0.00 (0.00)  | 0.00 (0.00)        | 0.08 (0.03)    | 0.00 (0.00)   |             |
| IR 81954 H           | 98  | 0.49 (0.14)   | 0.45 (1.06)B  | 0.50 (0.14) | 0.25(0.13)   | 3.50 (0.66)        | 0.01 (0.00)    | 0.14 (0.02)AB |             |
| IR 70369 A           | 98  | 0.47 (0.08)   | 0.38 (0.08)AB | 0.00 (0.00) | 0.00 (0.00)  | 0.80 (0.17)        | 0.01 (0.00)    | 0.13 (0.01)AB |             |
| IR 70369 B           | 91  | 0.57 (0.10)   | 0.34 (1.03)A  | 0.20 (0.09) | 0.00 (0.00)  | 0.80 (0.36)        | 0.01 (0.00)    | 0.00 (0.00)A  |             |
| IR72889-46-3-2-1 R   | 112 | 0.17 (0.02)   | 0.35 (0.08)A  | 1.20 (0.43) | 0.60 (0.18)  | 1.00 (0.20)        | 0.00 (0.00)    | 0.25 (0.02)B  |             |
| F-Period             |     | 1.519ns       | 5.824*        |             |              |                    |                |               |             |
| F-Period x Accession |     | 0.240ns       | 0.950ns       |             |              |                    |                |               |             |
| F-Accession          |     | 1.298ns       | 3.974*        | 1.004ns     | 1.753ns      | 2.713ns (3,15)     | 2.842ns (3,15) | 11.243***     | 0.667ns     |
| F-Height             |     |               |               |             |              |                    |                | 5.114*        |             |
| F-Leafiness          |     | 0.558ns       | 19.704***     |             |              |                    | 6.829* (1,15)  |               |             |
| IR 80637 H           | 56  | 0.16 (0.03)   | 0.04 (0.01)   | 0.00 (0.00) | 0.00 (0.00)  | 0.10 (0.04)        | 0.03 (0.01)    |               | 0.00 (0.00) |
| IR 73328 A           | 56  | 0.13 (0.03)   | 0.05 (0.01)   | 0.10 (0.04) | 0.00 (0.00)  | 0.00 (0.00)        | 0.02 (0.01)    |               | 0.00 (0.00) |
| IR 73328 B           | 56  | 0.27 (0.04)   | 0.04 (0.01)   | 0.00 (0.00) | 0.00 (0.00)  | 0.20 (0.09)        | 0.02 (0.01)    |               | 0.00 (0.00) |
| IR73013-95-1-3-2 R   | 56  | 0.15 (0.01)   | 0.02 (0.00)   | 0.00 (0.00) | 0.00 (0.00)  | 0.00 (0.00)        | 0.02 (0.00)    |               | 0.00 (0.00) |
| IR 80637 H           | 84  | 0.61 (0.11)   | 0.23 (1.06)   | 0.00 (0.00) | 0.00 (0.00)  | 0.00 (0.00)        | 0.03 (0.01)    | 0.10 (0.03)   |             |
| IR 73328 A           | 84  | 0.24 (0.03)   | 0.34 (0.05)   | 0.00 (0.00) | 0.00 (0.00)  | 0.20 (0.09)        | 0.00 (0.00)    | 0.00 (0.00)   |             |
| IR 73328 B           | 84  | 0.31 (0.06)   | 0.36 (0.07)   | 0.00 (0.00) | 0.00 (0.00)  | 0.00 (0.00)        | 0.01 (0.00)    | 0.01 (0.00)   |             |
| IR73013-95-1-3-2 R   | 84  | 0.70 (0.14)   | 0.20 (1.06)   | 0.00 (0.00) | 0.00 (0.00)  | 0.00 (0.00)        | 0.01 (0.00)    | 0.00 (0.00)   |             |
| IR 80637 H           | 98  | 0.62 (0.05)AB | 0.42 (0.08)   | 0.60 (0.18) | 0.00 (0.00)A | 2.80 (0.52)        | 0.01 (0.00)    | 0.26 (0.03)B  |             |
| IR 73328 A           | 98  | 0.14 (0.02)A  | 0.21 (0.04)   | 0.20 (0.09) | 0.00 (0.00)A | 0.40 (0.11)        | 0.01 (0.00)    | 0.05 (0.01)A  |             |
| IR 73328 B           | 91  | 0.12 (0.02)A  | 0.19 (0.02)   | 0.00 (0.00) | 0.80 (0.26)B | 2.00 (0.20)        | 0.00 (0.00)    | 0.09 (0.01)AB |             |
| IR73013-95-1-3-2 R   | 112 | 0.71 (0.10)B  | 0.32 (0.06)   | 0.00 (0.00) | 1.00 (0.24)B | 1.80 (0.26)        | 0.02 (0.00)    | 0.17 (0.02)AB |             |
| F-Period             |     | 0.249ns       | 3.806ns       |             |              |                    |                |               |             |
| F-Period x Accession |     | 0.130ns       | 0.865ns       |             |              |                    |                |               |             |
| F-Accession          |     | 3.558*        | 1.264ns       | 0.924ns     | 3.730*       | 1.771ns            | 0.198ns (3,16) | 3.931*        | NA          |
| F-Height             |     |               |               | 0.064ns     | 5.515*       | 2.949ns            |                |               |             |

|                      |     |               |              |             |             |               |               |                 |             |
|----------------------|-----|---------------|--------------|-------------|-------------|---------------|---------------|-----------------|-------------|
| F-Leafiness          |     | 0.017ns       | 11.626***    |             |             |               |               |                 |             |
| IR 82385 H           | 56  | 0.15 (0.02)   | 0.06 (0.02)  | 0.10 (0.04) | 0.00 (0.00) | 0.70 (0.21)   | 0.05 (0.01)   |                 | 0.20 (0.09) |
| IR 79125 A           | 56  | 0.16 (0.02)   | 0.05 (0.01)  | 0.00 (0.00) | 0.00 (0.00) | 0.00 (0.00)   | 0.01 (0.00)   |                 | 0.00 (0.00) |
| IR 79125 B           | 56  | 0.38 (0.04)   | 0.04 (0.00)  | 0.00 (0.00) | 0.00 (0.00) | 0.10 (0.04)   | 0.02 (0.01)   |                 | 0.20 (0.09) |
| IR73717-46-1-3-3 R   | 56  | 0.26 (0.02)   | 0.07 (0.01)  | 0.00 (0.00) | 0.00 (0.00) | 0.50 (0.10)   | 0.05 (0.01)   |                 | 0.00 (0.00) |
| IR 82385 H           | 84  | 0.63 (0.05)   | 0.55 (0.12)  | 0.20 (0.00) | 0.20 (0.00) | 0.00 (0.00)   | 0.00 (0.00)   | 0.02 (0.00)     |             |
| IR 79125 A           | 84  | 0.16 (0.02)   | 0.47 (0.06)  | 0.00 (0.00) | 0.00 (0.00) | 0.80 (0.36)   | 0.02 (0.01)   | 0.04 (0.02)     |             |
| IR 79125 B           | 84  | 0.61 (0.04)   | 0.57 (0.17)  | 0.00 (0.00) | 0.00 (0.00) | 0.20 (0.09)   | 0.00 (0.00)   | 0.03 (0.01)     |             |
| IR73717-46-1-3-3 R   | 84  | 0.67 (0.08)   | 0.47 (0.06)  | 0.00 (0.00) | 0.00 (0.00) | 0.20 (0.09)   | 0.01 (0.01)   | 0.05 (0.02)     |             |
| IR 82385 H           | 112 | 0.39 (0.02)   | 0.25 (0.05)  | 0.60 (0.11) | 0.80 (0.17) | 5.00 (0.73)B  | 0.03 (0.01)   | 0.25 (0.02)B    |             |
| IR 79125 A           | 98  | 0.29 (0.03)   | 0.43 (0.05)  | 0.40 (0.18) | 0.20 (0.09) | 2.40 (0.46)AB | 0.01 (0.01)   | 0.10 (0.01)A    |             |
| IR 79125 B           | 93  | 0.39 (0.03)   | 0.64 (0.07)  | 0.00 (0.00) | 0.20 (0.09) | 0.00 (0.00)A  | 0.01 (0.00)   | 0.00 (0.00)A    |             |
| IR73717-46-1-3-3 R   | 93  | 0.61 (0.07)   | 0.73 (0.06)  | 0.40 (0.18) | 1.20 (0.26) | 1.20 (0.22)A  | 0.01 (0.00)   | 0.06 (0.01)A    |             |
| F-Period             |     | 0.001ns       | 2.666ns      |             |             |               |               |                 |             |
| F-Period x Accession |     | 2.597ns       | 1.760ns      |             |             |               |               |                 |             |
| F-Accession          |     | 2.071ns       | 1.141ns      | 0.667ns     | 1.714ns     | 4.570*        | 1.158ns       | 13.624***       | 0.667ns     |
| F-Tillers            |     | 4.121*        | 8.205**      |             |             |               |               |                 |             |
| IR 82363 H           | 56  | 0.36 (0.03)   | 0.05 (0.01)  | 0.00 (0.00) | 0.00 (0.00) | 0.20 (0.05)   | 0.02 (0.00)   |                 | 0.20 (0.09) |
| IR 68897 A           | 56  | 0.25 (0.02)   | 0.03 (0.01)  | 0.00 (0.00) | 0.00 (0.00) | 0.00 (0.00)   | 0.01 (0.00)   |                 | 0.40 (0.18) |
| IR 68897 B           | 56  | 0.34 (0.09)   | 0.10 (0.04)  | 0.00 (0.00) | 0.00 (0.00) | 0.50 (0.17)   | 0.04 (0.01)   |                 | 0.67 (0.38) |
| SRT 3 R              | 56  | 0.27 (0.04)   | 0.10 (0.03)  | 0.00 (0.00) | 0.00 (0.00) | 0.10 (0.04)   | 0.03 (0.01)   |                 | 0.20 (0.09) |
| IR 82363 H           | 84  | 0.77 (0.06)   | 0.47 (0.00)  | 0.00 (0.00) | 0.00 (0.00) | 0.00 (0.00)   | 0.01 (0.01)   | 0.01 (0.01)     |             |
| IR 68897 A           | 84  | 0.31 (0.05)   | 0.17 (0.04)  | 0.00 (0.00) | 0.00 (0.00) | 0.20 (0.09)   | 0.00 (0.00)   | 0.02 (0.01)     |             |
| IR 68897 B           | 84  | 0.57 (0.11)   | 0.51 (1.09)  | 0.00 (1.00) | 0.00 (0.00) | 0.00 (0.00)   | 0.00 (0.00)   | 0.00 (0.00)     |             |
| SRT 3 R              | 84  | 0.70 (0.10)   | 0.47 (1.00)  | 0.00 (1.00) | 0.00 (0.00) | 0.40 (0.18)   | 0.00 (0.00)   | 0.12 (0.05)     |             |
| IR 82363 H           | 93  | 0.55 (0.05)B  | 0.70 (0.00)B | 0.00 (0.00) | 0.40 (0.18) | 0.20 (0.09)A  | 0.01 (0.00)   | 0.03 (0.01)A    |             |
| IR 68897 A           | 112 | 0.12 (0.01)A  | 0.16 (0.04)A | 0.00 (0.00) | 0.00 (0.00) | 6.40 (0.01)B  | 0.05 (0.01)   | 0.15 (0.01)AB   |             |
| IR 68897 B           | 93  | 0.42 (0.04)AB | 0.49 (0.11)A | 0.00 (0.00) | 0.00 (0.00) | 1.33 (0.51)AB | 0.01 (0.01)   | 0.05 (0.01)A    |             |
| SRT 3 R              | 112 | 0.48 (0.04)AB | 0.28 (0.06)A | 0.60 (0.27) | 0.20 (0.09) | 4.40 (0.64)B  | 0.07 (0.02)   | 0.28 (0.03)B    |             |
| F-Period             |     | 6.052*        | 2.134ns      |             |             |               |               |                 |             |
| F-Period x Accession |     | 0.110ns       | 1.334ns      |             |             |               |               |                 |             |
| F-Accession          |     | 5.390***      | 4.464*       | 0.843ns     | 0.583ns     | 3.590*        | 0.999ns       | 9.260*** (3,14) | 0.333ns     |
| F-Leafiness          |     | 2.106ns       | 6.820*       |             |             |               | 7.655* (3,13) |                 |             |



1: Numbers are means (SEM) (N = 5); Degrees of freedom for Time = 2,32, Time x Accession = 6,32 and Accession = 3,16 except where indicated by square brackets; ns =  $P > 0.05$ , \* =  $P < 0.05$ , \*\* =  $P < 0.01$ , \*\*\* =  $P < 0.001$ ; numbers in grey font were not included in the analyses because of low numbers of observations and frequent zeros; uppercase letters indicate homogenous accession groups based on all plant types, lowercase letters indicate groups based on analyses with A-lines excluded (Tukey  $P > 0.05$ ); 2: Note that the results for Leaffolders, Green hairy caterpillars, PSB, SSB, YSB, deadhearts and whiteheads have been summarized by plant-type and presented in a related paper by Horgan et al (2016); the data and information by accession and other data from this table have not been previously published.
